# Supplementary material for: Quantum Chemical and Experimental Studies of an Unprecedented Reaction Pathway of Nucleophilic Substitution of 2-Bromomethyl-1,3-thiaselenole with 1,3-Benzothiazole-2-thiol Proceeding Stepwise at Three Different Centers of Seleniranium Intermediates
Source: MDPI journal article supplement (doi:10.3390/molecules26216685), 2021-11-04
Supplement: s1 [file s1]

## Supplementary Materials

# Quantum Chemical and Experimental Studies of an Unprecedented Reaction Pathway of Nucleophilic Substitution of 2-Bromomethyl-1,3-thiaselenole with 1,3-Benzothiazole-2-thiol Proceeding Stepwise at Three Different Centers of Seleniranium Intermediates

Svetlana V. Amosova,\* Vladimir A. Shagun, Nataliya A. Makhaeva, Irina A. Novokshonova and Vladimir A. Potapov

A. E. Favorsky Irkutsk Institute of Chemistry, Siberian Division of The Russian Academy of Sciences, 1 Favorsky Str., Irkutsk 664033, Russia; [shagun@irioch.irk.ru](mailto:shagun@irioch.irk.ru) (V.A.S.); [ggm@irioch.irk.ru](mailto:ggm@irioch.irk.ru) (N.A.M.); [Lotelen@yandex.ru](mailto:Lotelen@yandex.ru) (I.A.N.); [v.a.potapov@mail.ru](mailto:v.a.potapov@mail.ru) (V.A.P.).

\* Correspondence: [amosova@irioch.irk.ru](mailto:amosova@irioch.irk.ru) (S.V.A.)

| Table of Contents                                                            | pages |
|------------------------------------------------------------------------------|-------|
| Synthesis of 2-bromomethyl-1,3-thiaselenole 1                                | 2     |
| 2-(2,3-Dihydro-1,4-thiaselenin-2-ylsulfanyl)-1,3-benzothiazole 4             | 3     |
| 2-[(1,3-Thiaselenol-2-ylmethyl)sulfanyl]-1,3-benzothiazole 5                 | 3     |
| NMR spectra of the compounds 1, 4, 5 and 6a (Figures S1-S13)                 | 4-16  |
| The analysis of NMR spectra of Runs 7, 11 and 12 (Table 1) (Figures S14-S19) | 17-22 |
| Results of quantum chemical calculations (Tables S1-S25)                     | 23-41 |

Starting 2-bromomethyl-1,3-thiaselenole (1) was prepared from SeBr<sub>2</sub> and divinyl sulfide according to the previously described procedure: Amosova, S.V.; Novokshonova, I.A.; Penzik, M.V.; Filippov, A.S.; Albanov, A.I.; Potapov, V.A. Reaction of 2-bromomethyl-1,3-thiaselenole with thiourea: En route to the first representatives of 2-(organylsulfanyl)-2,3-dihydro-1,4-thiaselenines. *Tetrahedron Lett.* 2017, **58**, 4381-4383. <https://doi.org/10.1016/j.tetlet.2017.10.011>

2-Bromomethyl-1,3-thiaselenole (1). Modified procedure for the synthesis 2-bromomethyl-1,3-thiaselenole 1. Dried, freshly distilled and argon-degassed CCl<sub>4</sub> was used in the reaction. The reaction was carried out under argon atmosphere. A solution of bromine (5.85 g, 36.63 mmol) in CCl<sub>4</sub> (30 mL) was added dropwise to powdered selenium (2.89 g, 36.63 mmol, carefully ground) in CCl<sub>4</sub> (70 mL) over 15-20 min under an Ar atmosphere and the mixture stirred for 2 h. The formed solution of SeBr<sub>2</sub> in CCl<sub>4</sub> (100 mL) and divinyl sulfide (3.15 g, 36.63 mmol) in CCl<sub>4</sub> (10 mL) were simultaneously added dropwise over 1 h to a flask containing CCl<sub>4</sub> (15-20 mL) so that the molar ratio of both reagents in the mixture was 1:1. The reaction mixture was stirred for 3 h, then a solution of pyridine (3.47 g, 43.92 mmol) in CCl<sub>4</sub> (10 mL) was added over 10-15 min, and the mixture stirred overnight. The reaction mixture was filtered, and the solution stirred for 24 h and filtered again. Most of the solvent was removed by rotary evaporation. The residue (25-30 mL) was allowed to stand for 1 h and filtered. The solvent and the remaining pyridine were removed from the filtrate *in vacuo* to give high purity thiaselenole 1 (6.35 g, yellow oil) in 71% yield.

<sup>1</sup>H-NMR (400 MHz, CDCl<sub>3</sub>): δ: 6.63 (d, <sup>3</sup>J<sub>H,H</sub> = 6.3 Hz, <sup>2</sup>J<sub>Se,H</sub> = 49.3 Hz, 1H, SeCH=HCS), 6.40 (d, <sup>3</sup>J<sub>H,H</sub> = 6.3 Hz, <sup>3</sup>J<sub>Se,H</sub> = 21.0 Hz, 1H, SeCH=HCS), 5.06 (dd, <sup>3</sup>J<sub>H,H</sub> = 7.3 Hz, <sup>3</sup>J<sub>H,H</sub> = 8.2 Hz, <sup>2</sup>J<sub>Se,H</sub> = 24.0 Hz, 1H, SCHSe), 3.63 (dd, <sup>2</sup>J<sub>H,H</sub> = 10.0 Hz, <sup>3</sup>J<sub>H,H</sub> = 8.2 Hz, 1H, CH<sub>2</sub>Br), 3.57 (dd, <sup>2</sup>J<sub>H,H</sub> = 10.0 Hz, <sup>3</sup>J<sub>H,H</sub> = 7.3 Hz, 1H, CH<sub>2</sub>Br); <sup>13</sup>C-NMR (100 MHz, CDCl<sub>3</sub>): δ: 119.59 (SeCH=HCS), 113.46 (<sup>1</sup>J<sub>Se,C</sub> = 106.6 Hz, SeCH=HCS), 47.65 (<sup>1</sup>J<sub>Se,C</sub> = 71.3 Hz, SCHSe), 37.51 (CH<sub>2</sub>Br); <sup>77</sup>Se-NMR (76 MHz, CDCl<sub>3</sub>): δ: 521.57; MS (EI) *m/z*: 244 ([M]<sup>+</sup>, 21%), 151 (74%), 84 (99%), 58 (87%), 49 (100%); Anal. Calcd for C<sub>4</sub>H<sub>5</sub>BrSSe: C 19.69, H 2.07, Br 32.75, S 13.14, Se 32.36. Found: C 19.43, H 2.18, Br 32.64, S 13.44, Se 32.21.

2-(2,3-Dihydro-1,4-thiaselenin-2-ylsulfanyl)-1,3-benzothiazole (4). Yield: 99%, a yellow powder, m.p. 90-91 °C. <sup>1</sup>H-NMR (400 MHz, CDCl<sub>3</sub>): δ: 7.85 (d, <sup>3</sup>J<sub>H,H</sub> = 8.2 Hz, 1H, H-5), 7.70 (d, <sup>3</sup>J<sub>H,H</sub> = 8.0 Hz, 1H, H-8), 7.38 (dd, <sup>3</sup>J<sub>H-5,H-6</sub> = 8.2 Hz, <sup>3</sup>J<sub>H-6,H-7</sub> = 7.5 Hz, 1H, H-6), 7.26 (dd, <sup>3</sup>J<sub>H-7,H-8</sub> = 8.0 Hz, <sup>3</sup>J<sub>H-6,H-7</sub> = 7.5 Hz, 1H, H-7), 6.47 (d, <sup>3</sup>J<sub>H,H</sub> = 10.0 Hz, <sup>2</sup>J<sub>Se,H</sub> = 50.0 Hz, 1H, SeCH=CHS), 6.39 (d, <sup>3</sup>J<sub>H,H</sub> = 10.0 Hz, 1H, SeCH=CHS), 5.67 (dd, <sup>3</sup>J<sub>H,H</sub> = 6.9 Hz, <sup>3</sup>J<sub>H,H</sub> = 2.3 Hz, 1H, SCHS), 3.68 (dd, <sup>2</sup>J<sub>H,H</sub> = 12.2 Hz, <sup>3</sup>J<sub>H,H</sub> = 2.3 Hz, 1H, SeCH<sub>2</sub>), 3.35 (dd, <sup>2</sup>J<sub>H,H</sub> = 12.2 Hz, <sup>3</sup>J<sub>H,H</sub> = 6.9 Hz, 1H, SeCH<sub>2</sub>); <sup>13</sup>C-NMR (100 MHz, CDCl<sub>3</sub>): δ: 163.34 (C-2), 152.71 (C-4), 135.26 (C-9), 125.97 (C-6), 124.48 (C-7), 121.65 (C-5), 120.93 (C-8), 117.81 (<sup>2</sup>J<sub>C,Se</sub> = 8.2 Hz, SeCH=CHS), 110.02 (<sup>1</sup>J<sub>C,Se</sub> = 116.3 Hz, SeCH=CHS), 45.69 (SCHS), 25.15 (<sup>1</sup>J<sub>C,Se</sub> = 64.6 Hz, SeCH<sub>2</sub>); <sup>15</sup>N-NMR (40 MHz, CDCl<sub>3</sub>): δ: -79.84; <sup>77</sup>Se-NMR (76 MHz, CDCl<sub>3</sub>): δ: 181.05; MS (EI) m/z: 332 ([M]<sup>+</sup>, 4%), 272 (6%), 192 (32%), 164 (100%), 151 (7%), 135 (7%), 122 (8%), 108 (24%), 84 (58%), 69 (16%), 63 (10%), 58 (25%), 53 (10%), 45 (23%), 39 (9%). Anal. calcd for C<sub>11</sub>H<sub>9</sub>NS<sub>3</sub>Se: C 39.99, H 2.75, N 4.24, S 29.12, Se 23.90. Found: C 39.82, H 2.60, N 4.08, S 28.97, Se 24.15.

2-[(1,3-Thiaselenol-2-ylmethyl)sulfanyl]-1,3-benzothiazole (5). Yield: 99%, a white-yellow powder, m.p. 109-110 °C. <sup>1</sup>H-NMR (400 MHz, CDCl<sub>3</sub>): δ: 7.86 (ddd, <sup>3</sup>J<sub>H-5,H-6</sub> = 8.3 Hz, <sup>4</sup>J<sub>H-5,H-7</sub> = 1.0 Hz, <sup>5</sup>J<sub>H-5,H-8</sub> = 0.6 Hz, 1H, H-5), 7.74 (ddd, <sup>3</sup>J<sub>H-7,H-8</sub> = 8.1 Hz, <sup>4</sup>J<sub>H-6,H-8</sub> = 1.2 Hz, <sup>5</sup>J<sub>H-5,H-8</sub> = 0.6 Hz, 1H, H-8), 7.41 (ddd, <sup>3</sup>J<sub>H-5,H-6</sub> = 8.3 Hz, <sup>3</sup>J<sub>H-6,H-7</sub> = 7.3 Hz, <sup>4</sup>J<sub>H-6,H-8</sub> = 1.2 Hz, 1H, H-6), 7.29 (ddd, <sup>3</sup>J<sub>H-7,H-8</sub> = 8.1 Hz, <sup>3</sup>J<sub>H-6,H-7</sub> = 7.3 Hz, <sup>4</sup>J<sub>H-5,H-7</sub> = 1.0 Hz, 1H, H-7), 6.64 (d, <sup>3</sup>J<sub>H,H</sub> = 6.6 Hz, <sup>2</sup>J<sub>Se,H</sub> = 48.4 Hz, 1H, SeCH=CHS), 6.42 (d, <sup>3</sup>J<sub>H,H</sub> = 6.6 Hz, 1H, SeCH=CHS), 5.34 (t, <sup>3</sup>J<sub>H,H</sub> = 7.2 Hz, 1H, SCHSe), 3.73 (dd, <sup>2</sup>J<sub>H,H</sub> = 13.8 Hz, <sup>3</sup>J<sub>H,H</sub> = 7.2 Hz, 1H, CH<sub>2</sub>S), 3.67 (dd, <sup>2</sup>J<sub>H,H</sub> = 13.8 Hz, <sup>3</sup>J<sub>H,H</sub> = 7.2 Hz, 1H, CH<sub>2</sub>S); <sup>13</sup>C-NMR (100 MHz, CDCl<sub>3</sub>): δ: 165.15 (C-2), 153.04 (C-4), 135.40 (C-9), 126.08 (C-6), 124.42 (C-7), 121.62 (C-5), 121.01 (C-8), 119.85 (SeCH=CHS), 113.74 (<sup>1</sup>J<sub>C,Se</sub> = 106.0 Hz, SeCH=CHS), 46.75 (<sup>1</sup>J<sub>C,Se</sub> = 70.0 Hz, SCHSe), 41.94 (<sup>2</sup>J<sub>C,Se</sub> = 7.8 Hz, CH<sub>2</sub>S); <sup>15</sup>N-NMR (40 MHz, CDCl<sub>3</sub>): δ: -83.70; <sup>77</sup>Se-NMR (76 MHz, CDCl<sub>3</sub>): δ 517.6; MS (EI) m/z: 332 ([M]<sup>+</sup>, 2%), 192 (19%), 164 (100%), 151 (44%), 135 (5%), 122 (11%), 108 (27%), 102 (7%), 95 (4%), 84 (34%), 69 (15%), 63 (10%), 58 (24%), 53 (6%), 45 (27%), 39 (10%). Anal. calcd for C<sub>11</sub>H<sub>9</sub>NS<sub>3</sub>Se: C 39.99, H 2.75, N 4.24, S 29.12, Se 23.90. Found: C 39.94, H 2.65, N 4.14, S 29.27, Se 23.77.

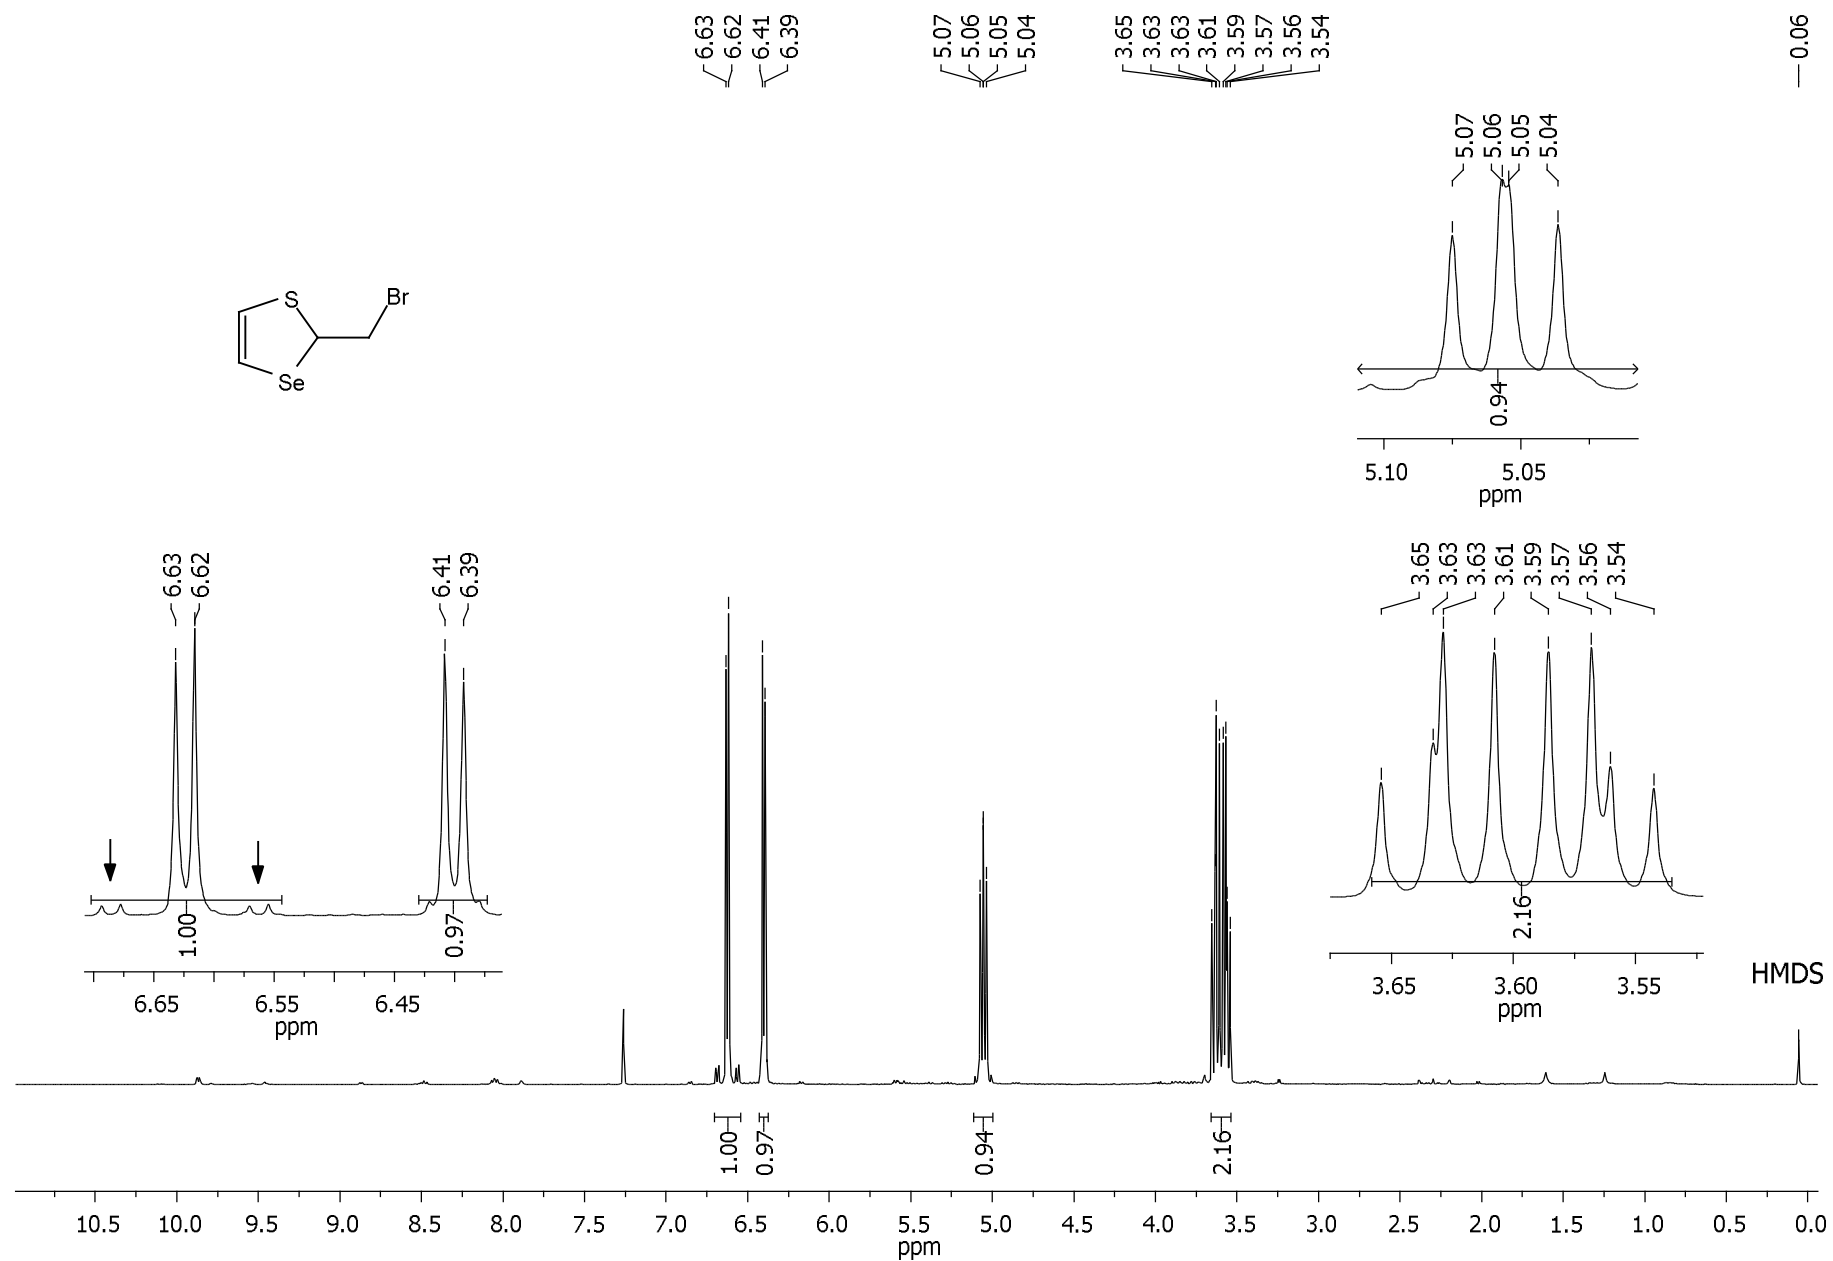

Figure S1. <sup>1</sup>H-NMR spectrum of 2-bromomethyl-1,3-thiaselenole (1)

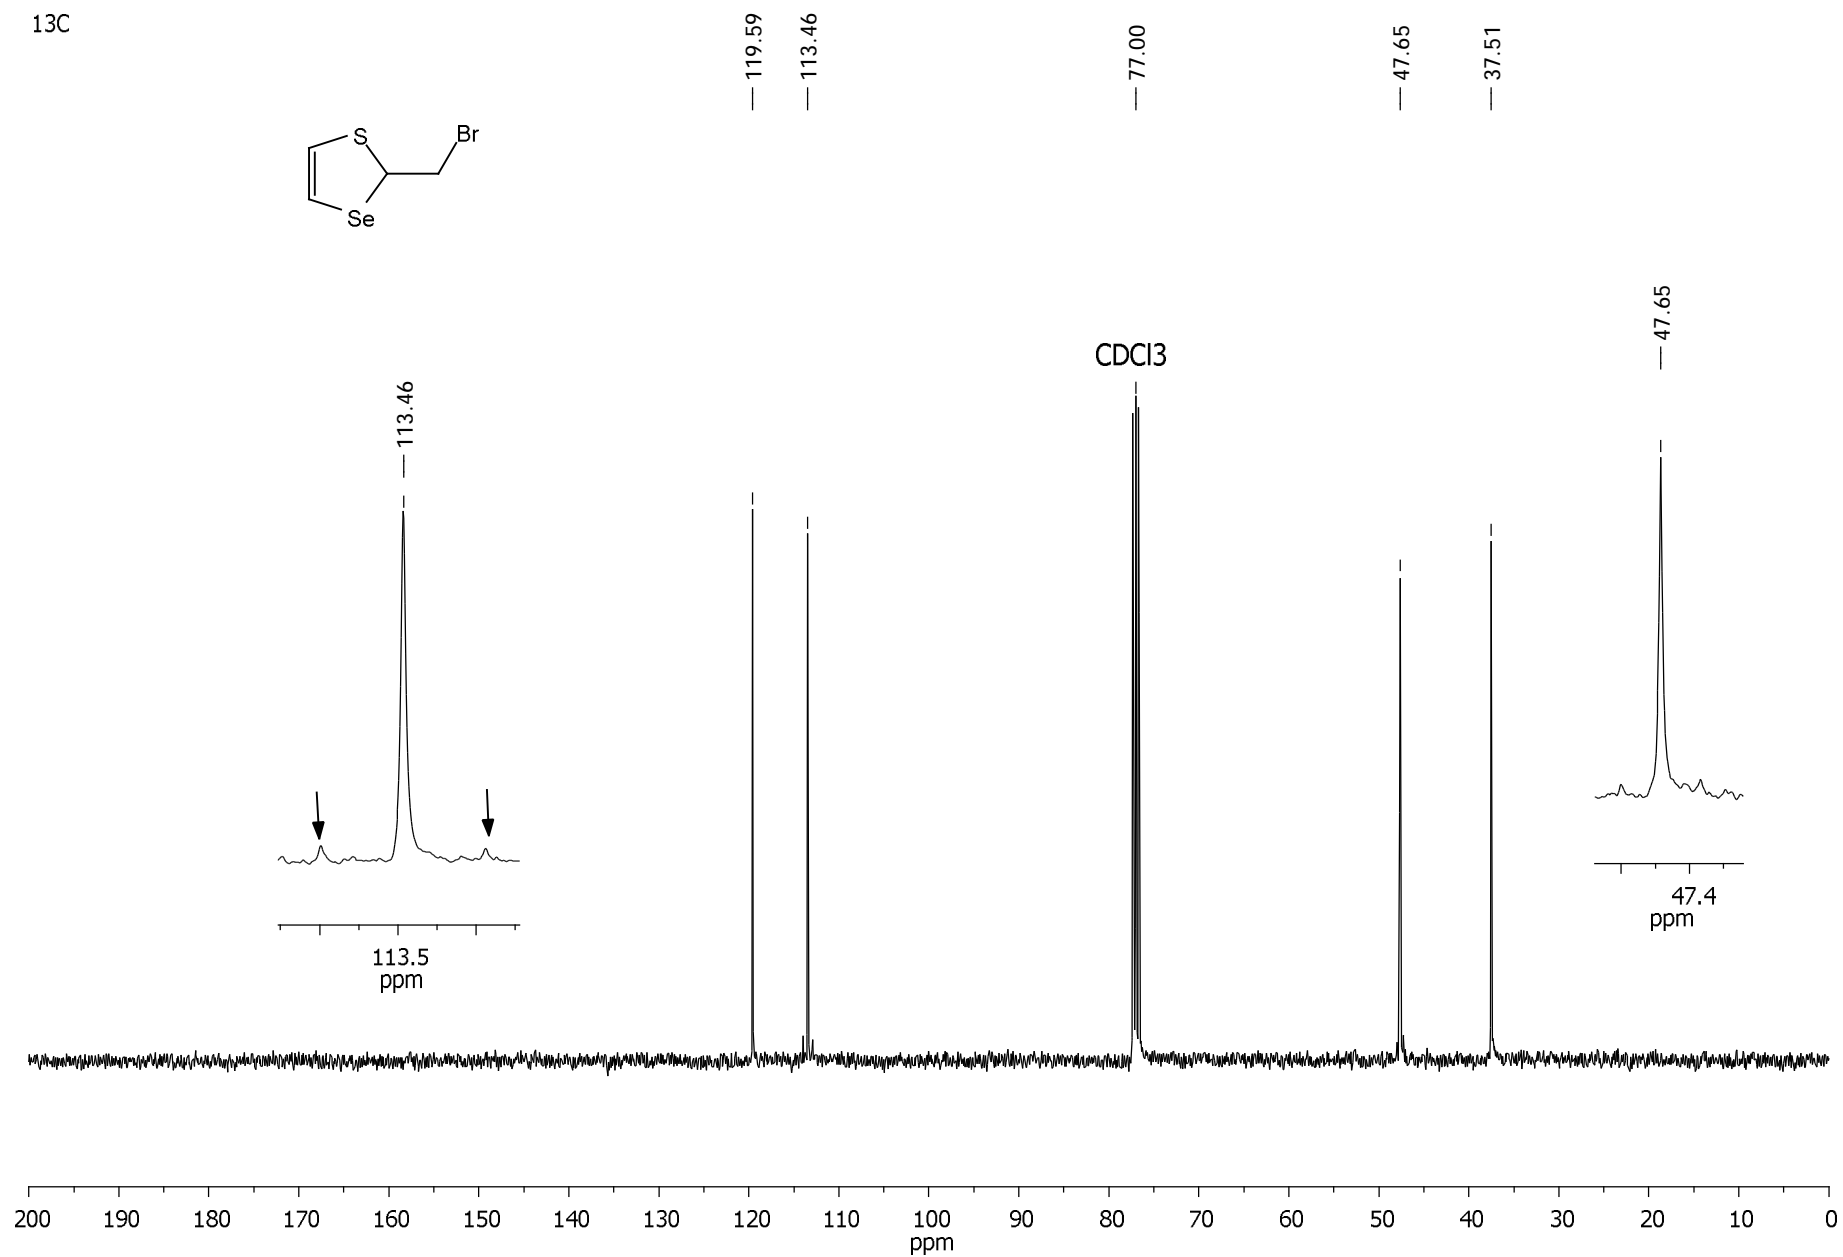

Figure S2. <sup>13</sup>C–NMR spectrum of 2-bromomethyl-1,3-thiaselenole (1)

$^{77}\text{Se}$

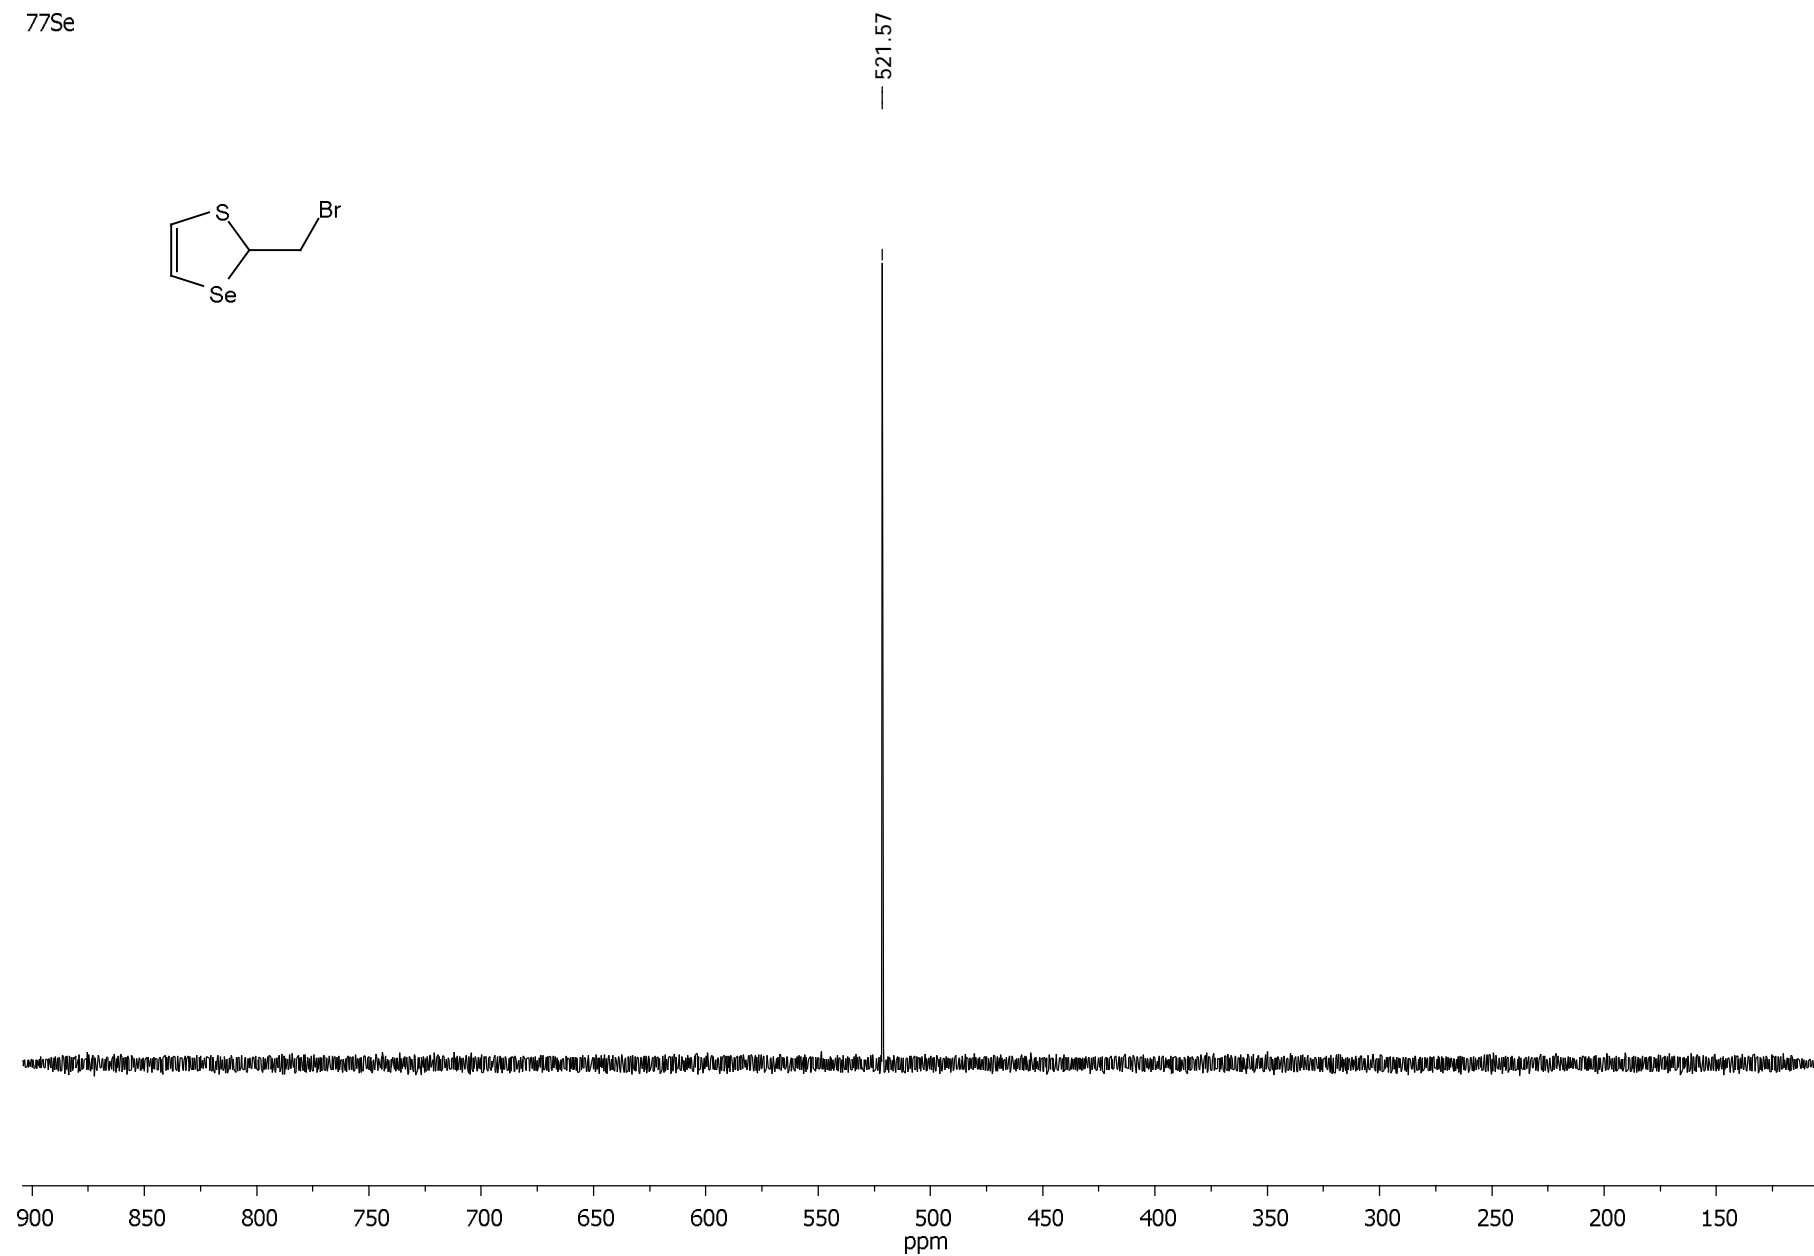

**Figure S3.**  $^{77}\text{Se}$ -NMR spectrum of 2-bromomethyl-1,3-thiaselenole (1)

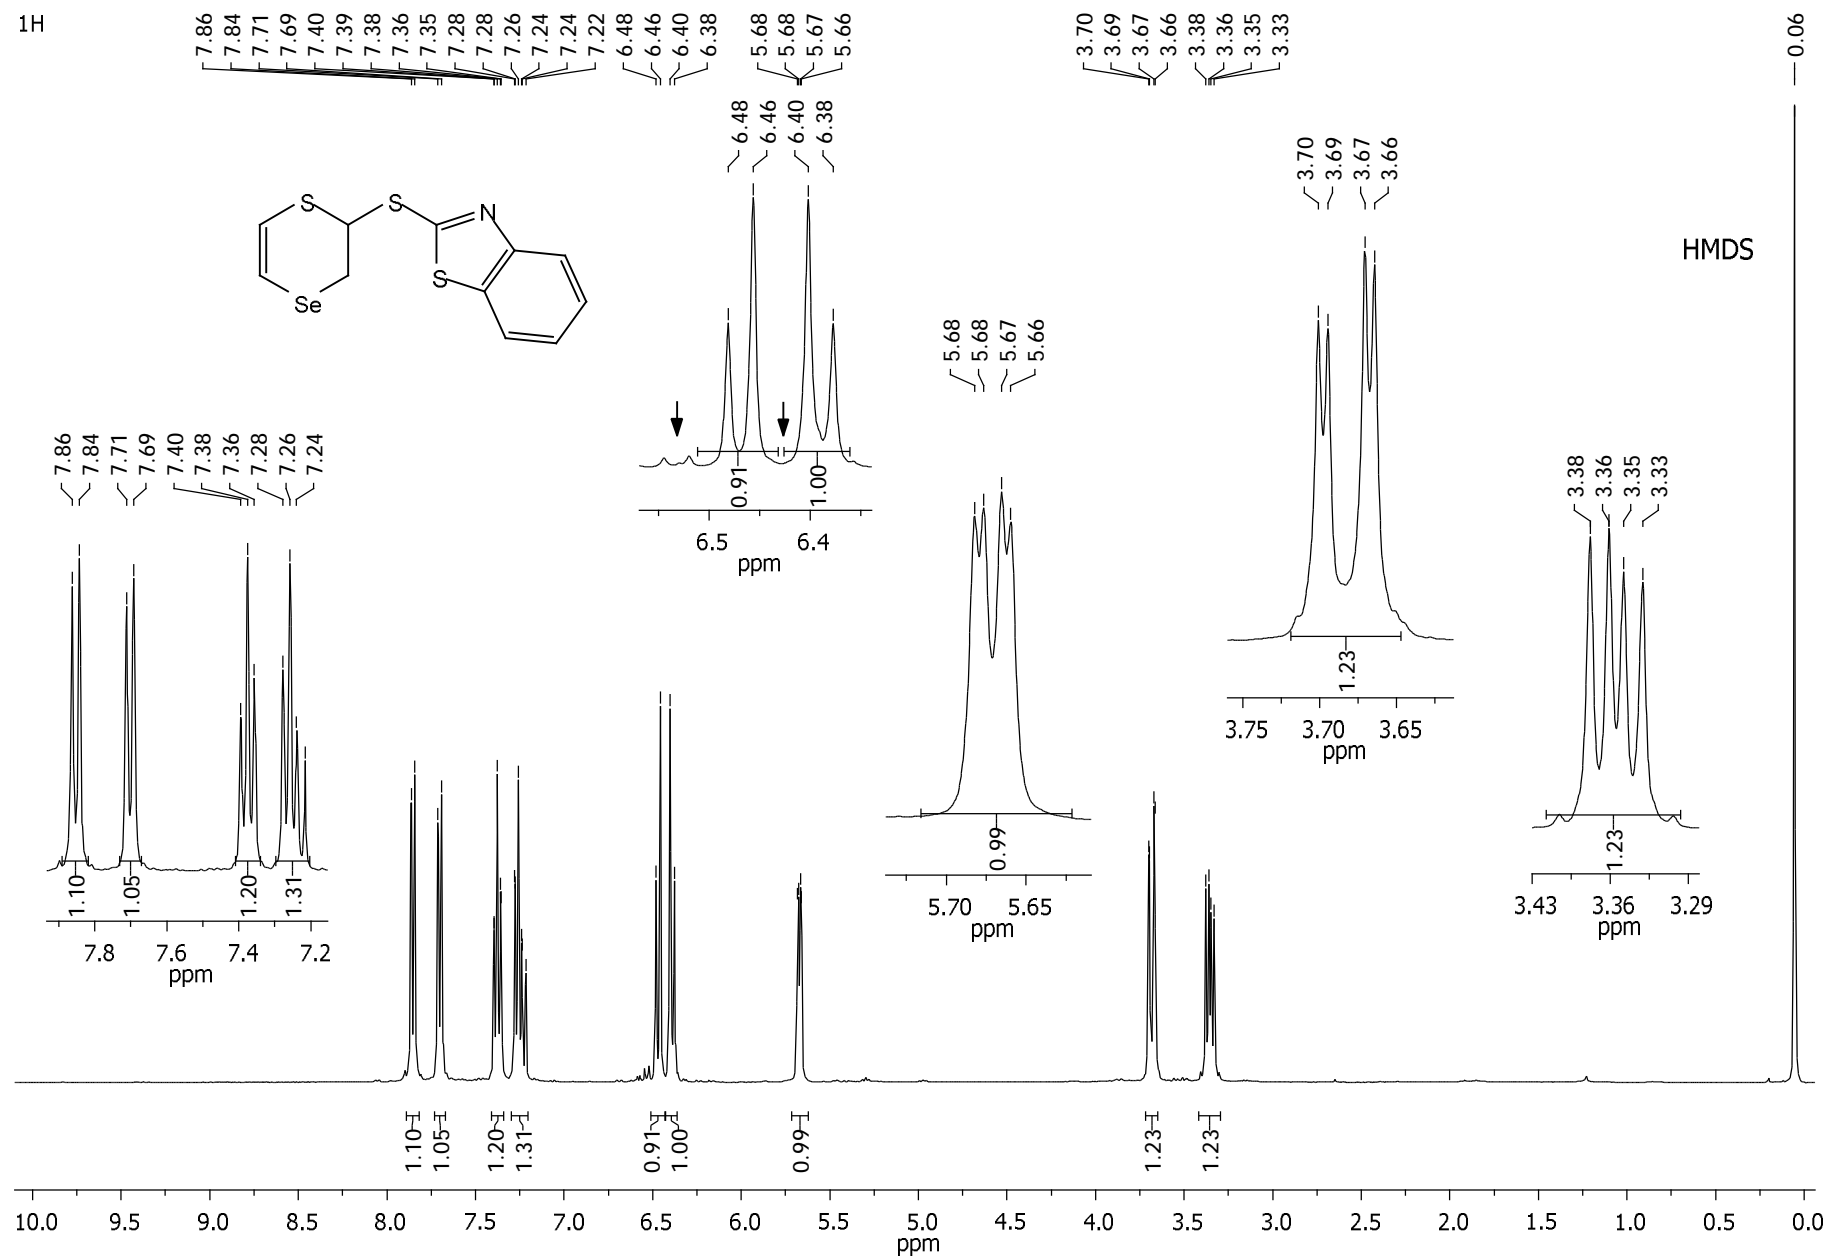

Figure S4. <sup>1</sup>H-NMR spectrum of 2-(2,3-dihydro-1,4-thiaselenin-2-ylsulfanyl)-1,3-benzothiazole (4)

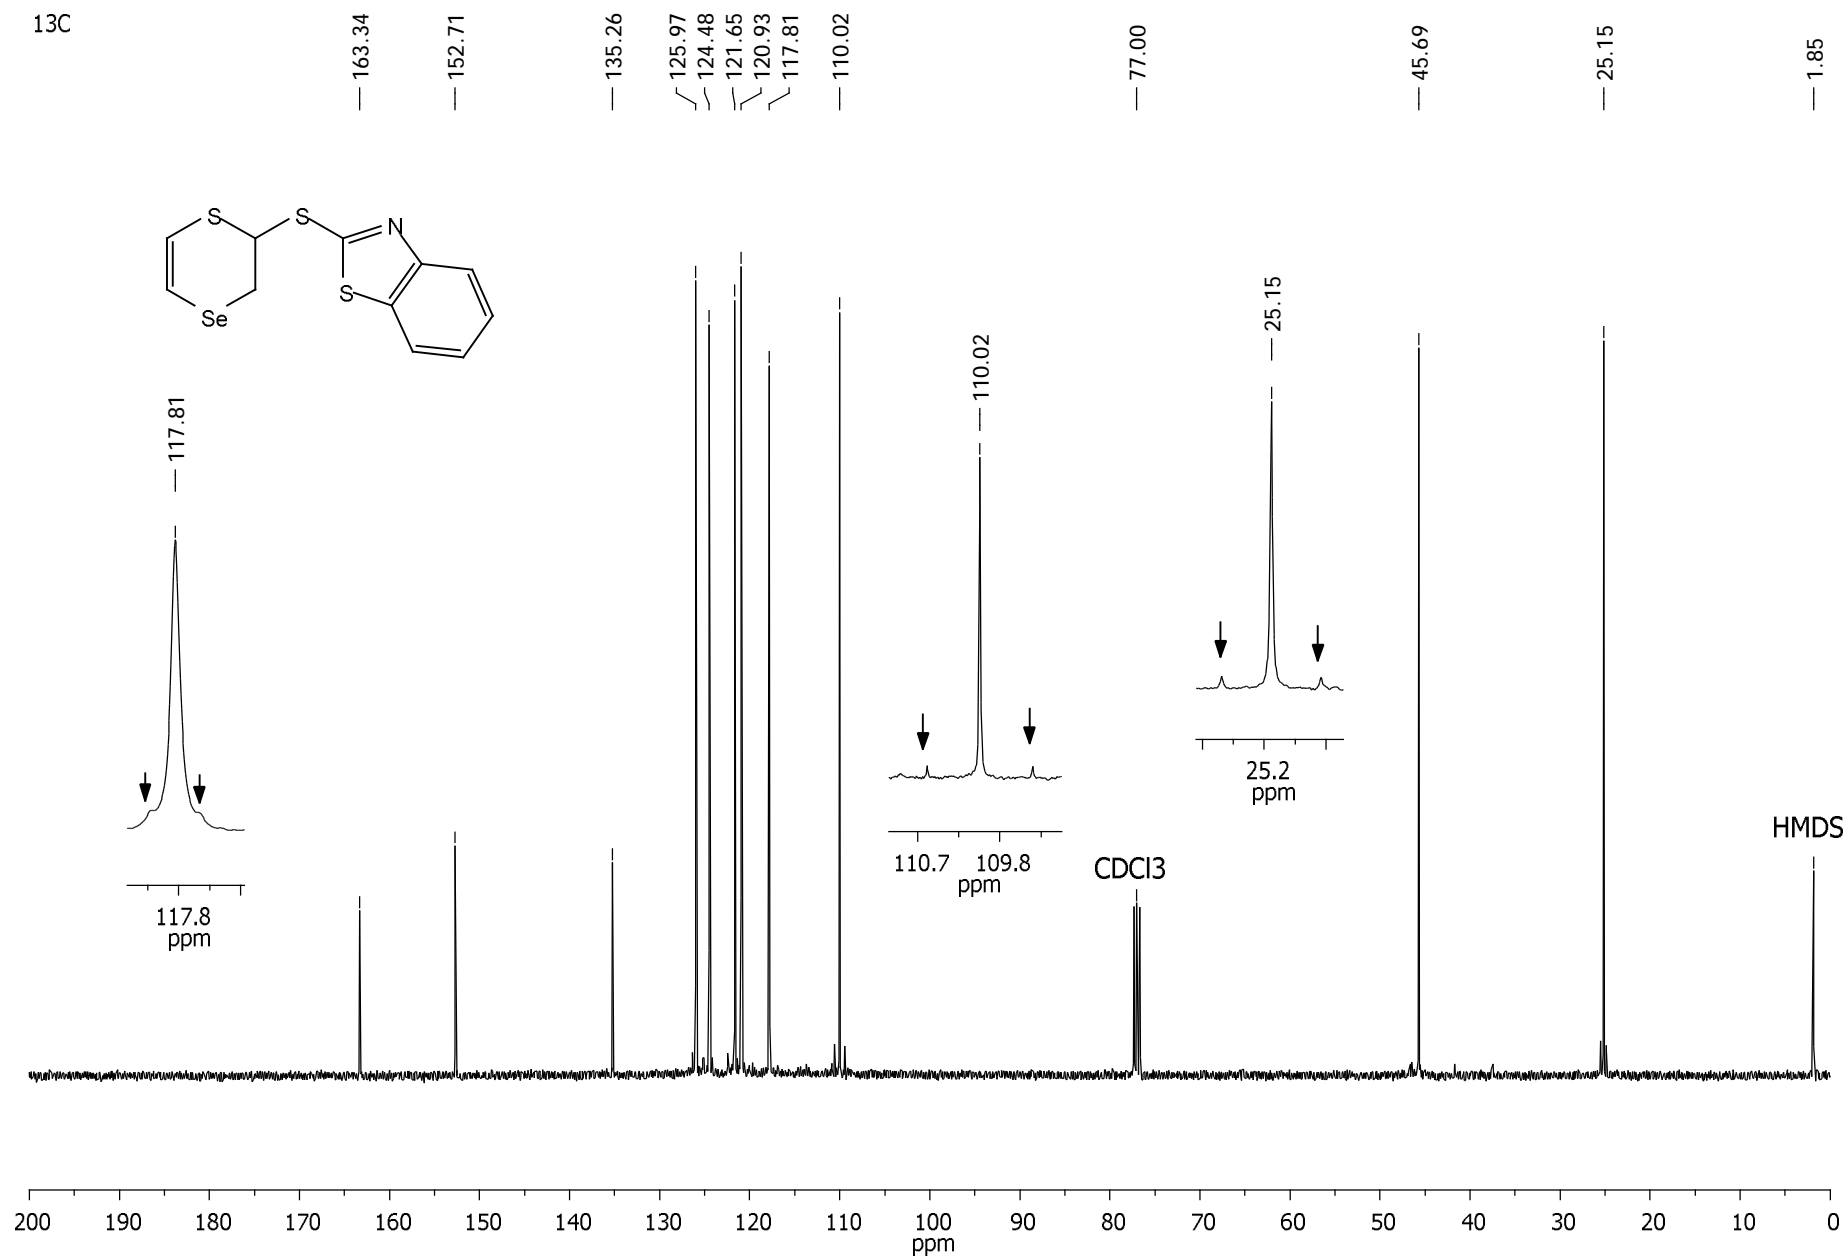

Figure S5. <sup>13</sup>C-NMR spectrum of 2-(2,3-dihydro-1,4-thiaselenin-2-ylsulfanyl)-1,3-benzothiazole (4)



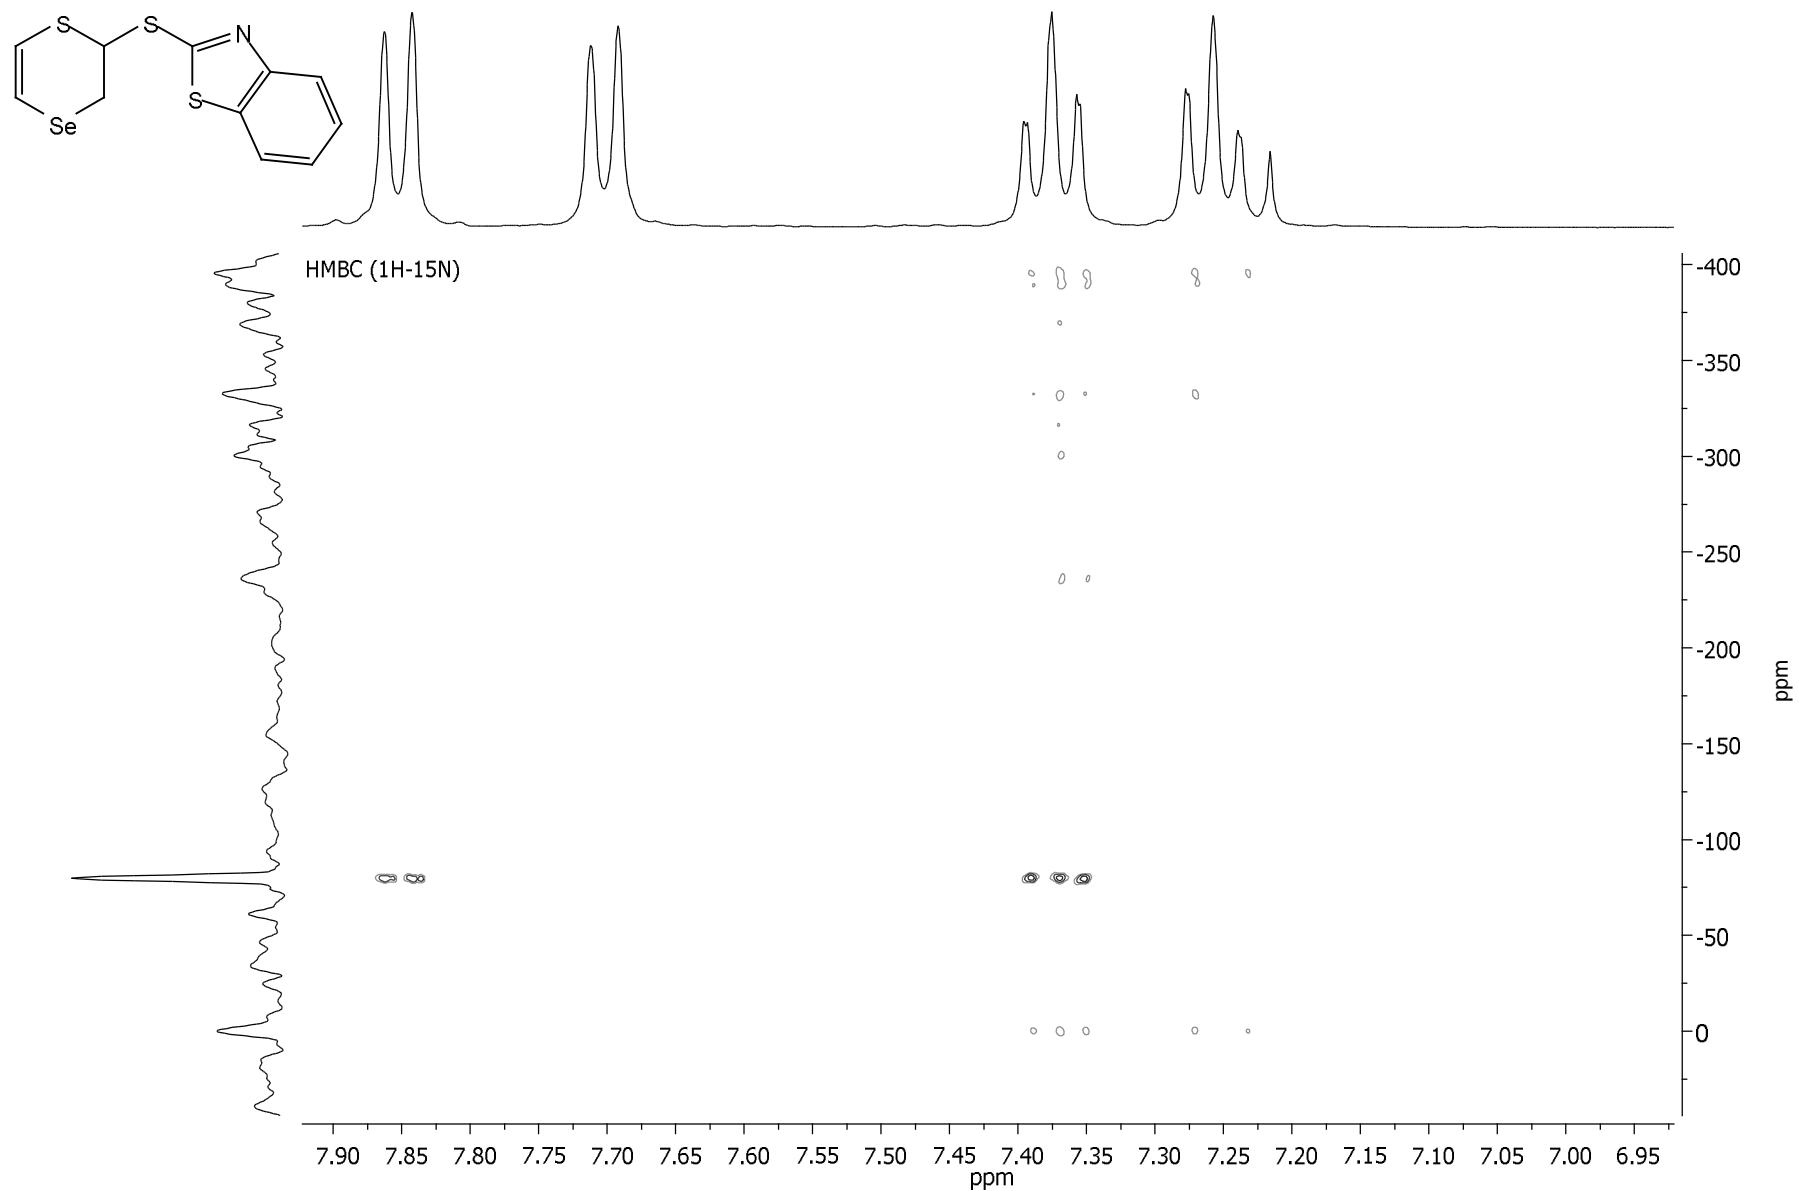

**Figure S6.** HMBC-( $^1\text{H}$ - $^{15}\text{N}$ )-NMR spectrum of 2-(2,3-dihydro-1,4-thiaselenin-2-ylsulfanyl)-1,3-benzothiazole (4)

$^{77}\text{Se}$

— 181.05

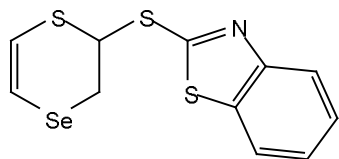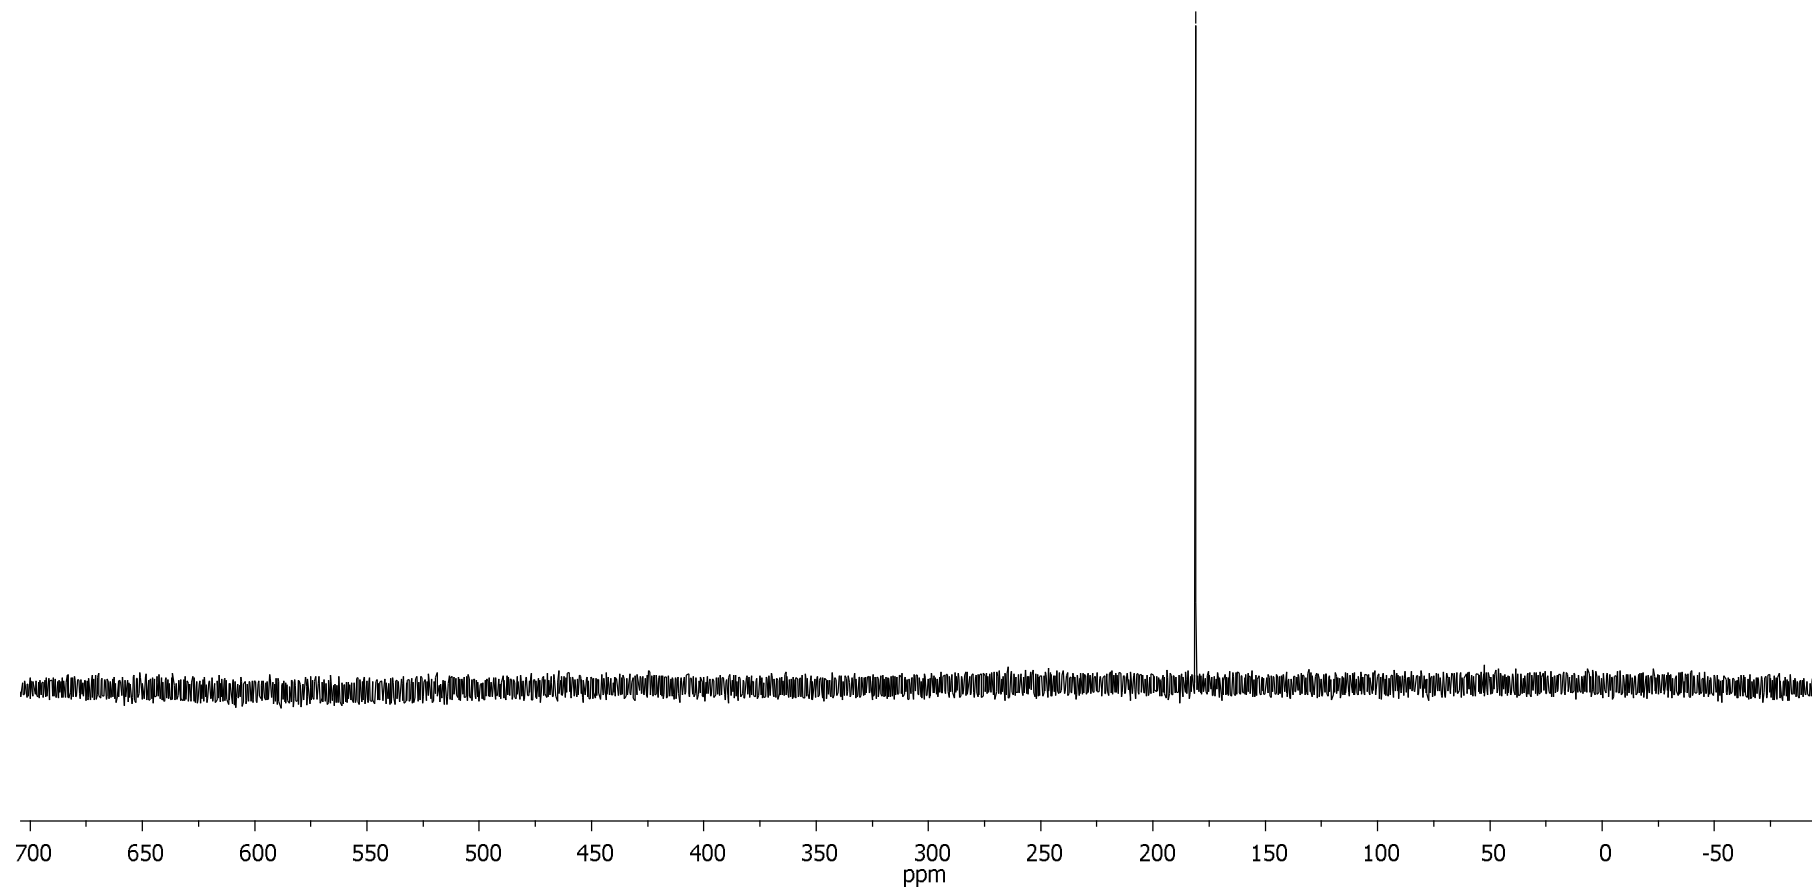

**Figure S7.**  $^{77}\text{Se}$ -NMR spectrum of 2-(2,3-dihydro-1,4-thiaselenin-2-ylsulfanyl)-1,3-benzothiazole (4)

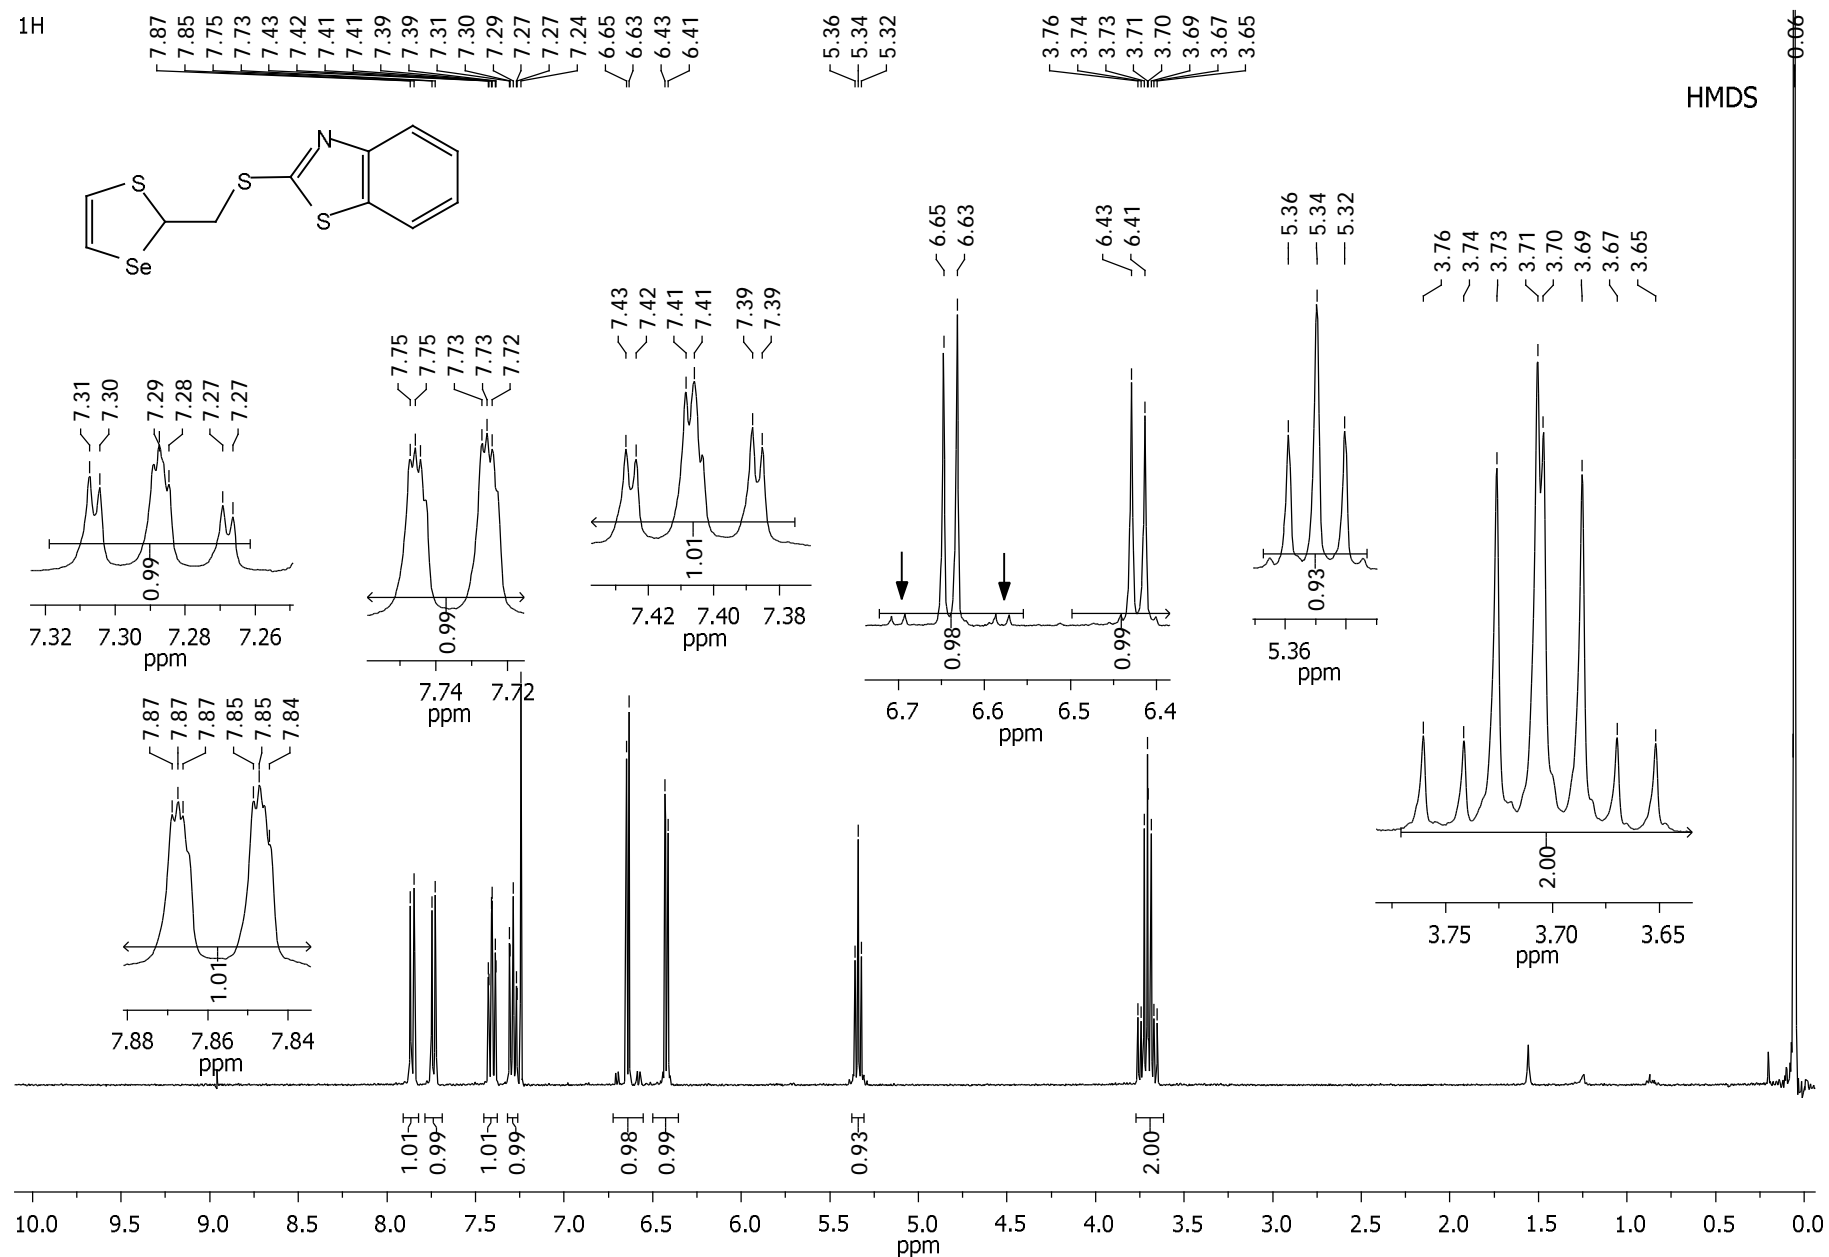

Figure S8. <sup>1</sup>H-NMR spectrum of 2-[(1,3-thiaselenol-2-ylmethyl)sulfanyl]-1,3-benzothiazole (5)

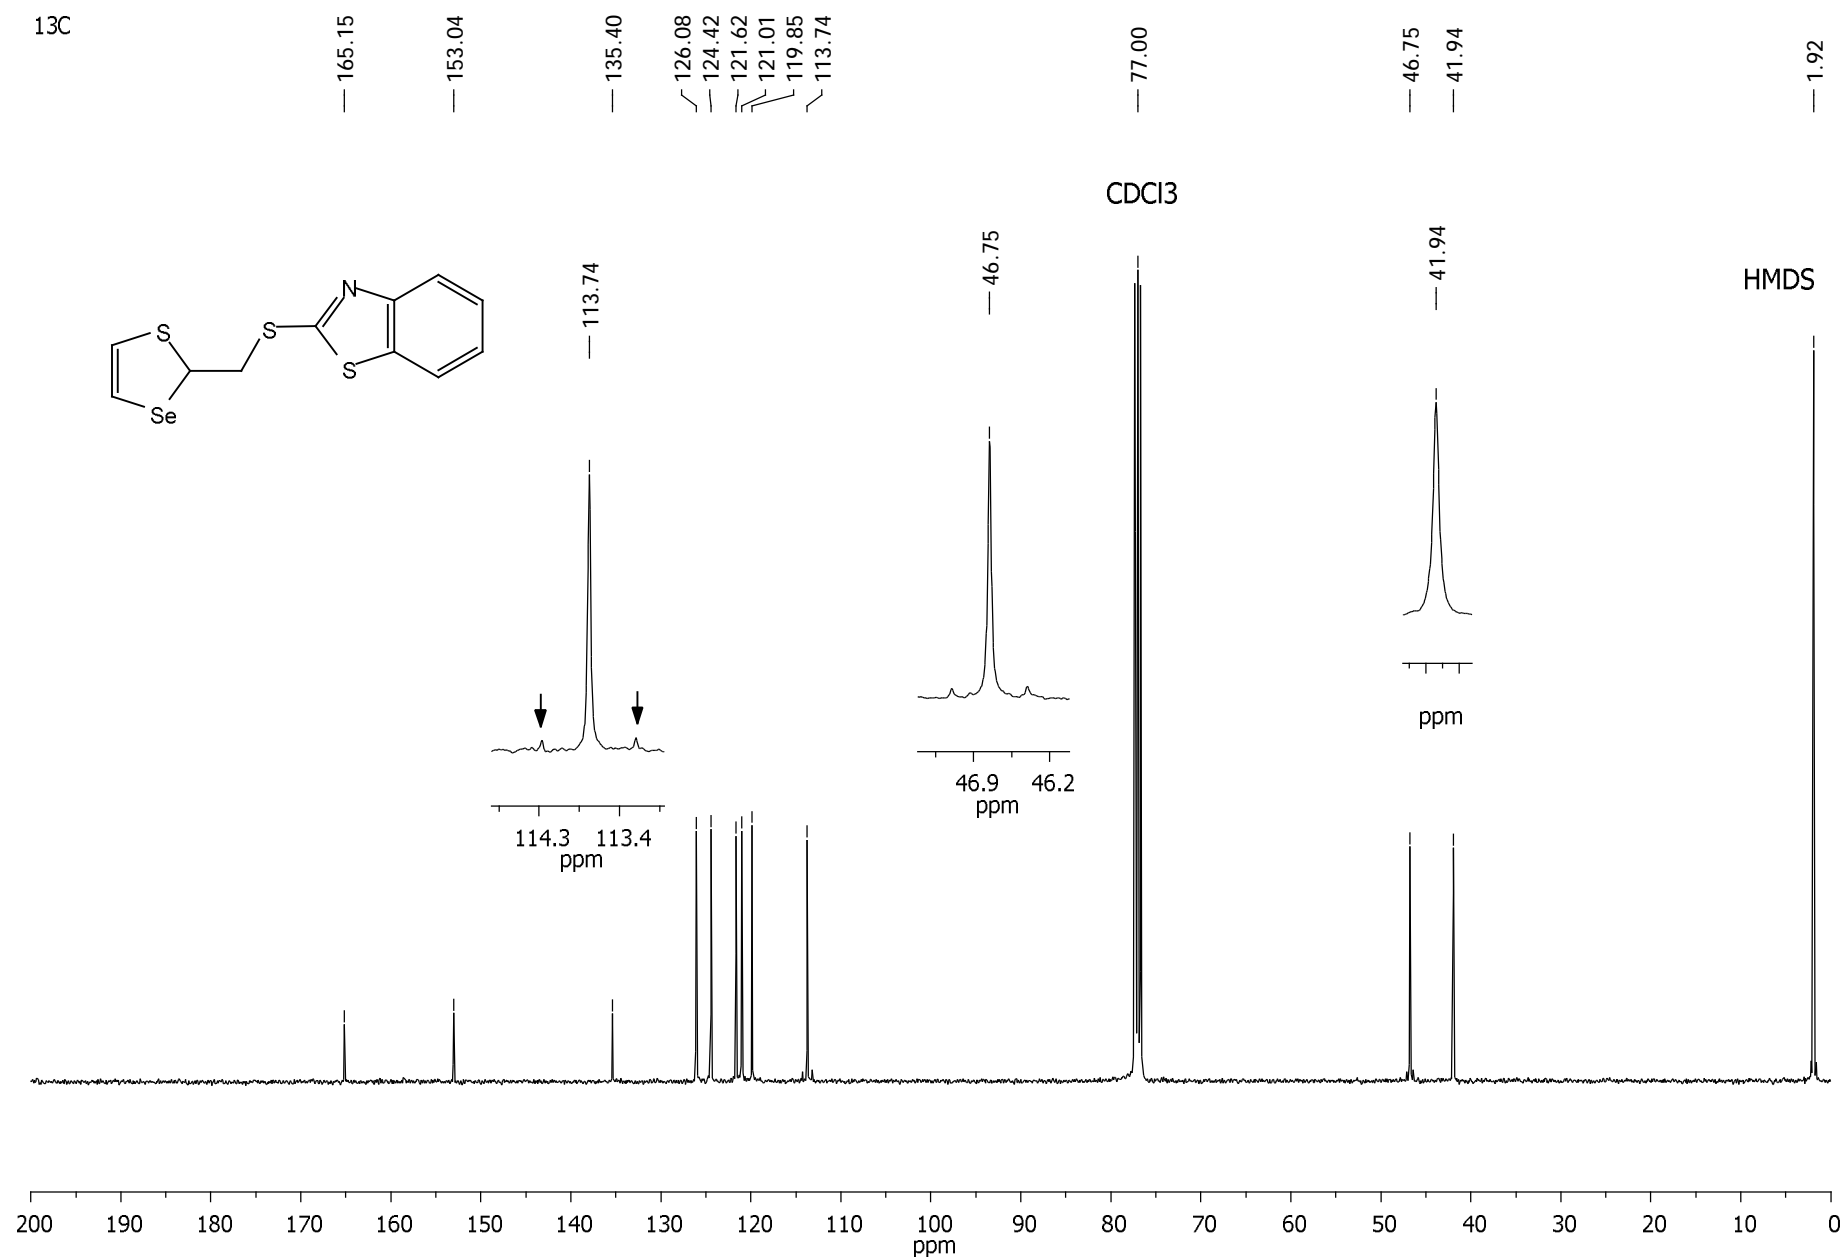

**Figure S9.** <sup>13</sup>C–NMR spectrum of 2-[(1,3-thiaselenol-2-ylmethyl)sulfanyl]-1,3-benzothiazole (5)

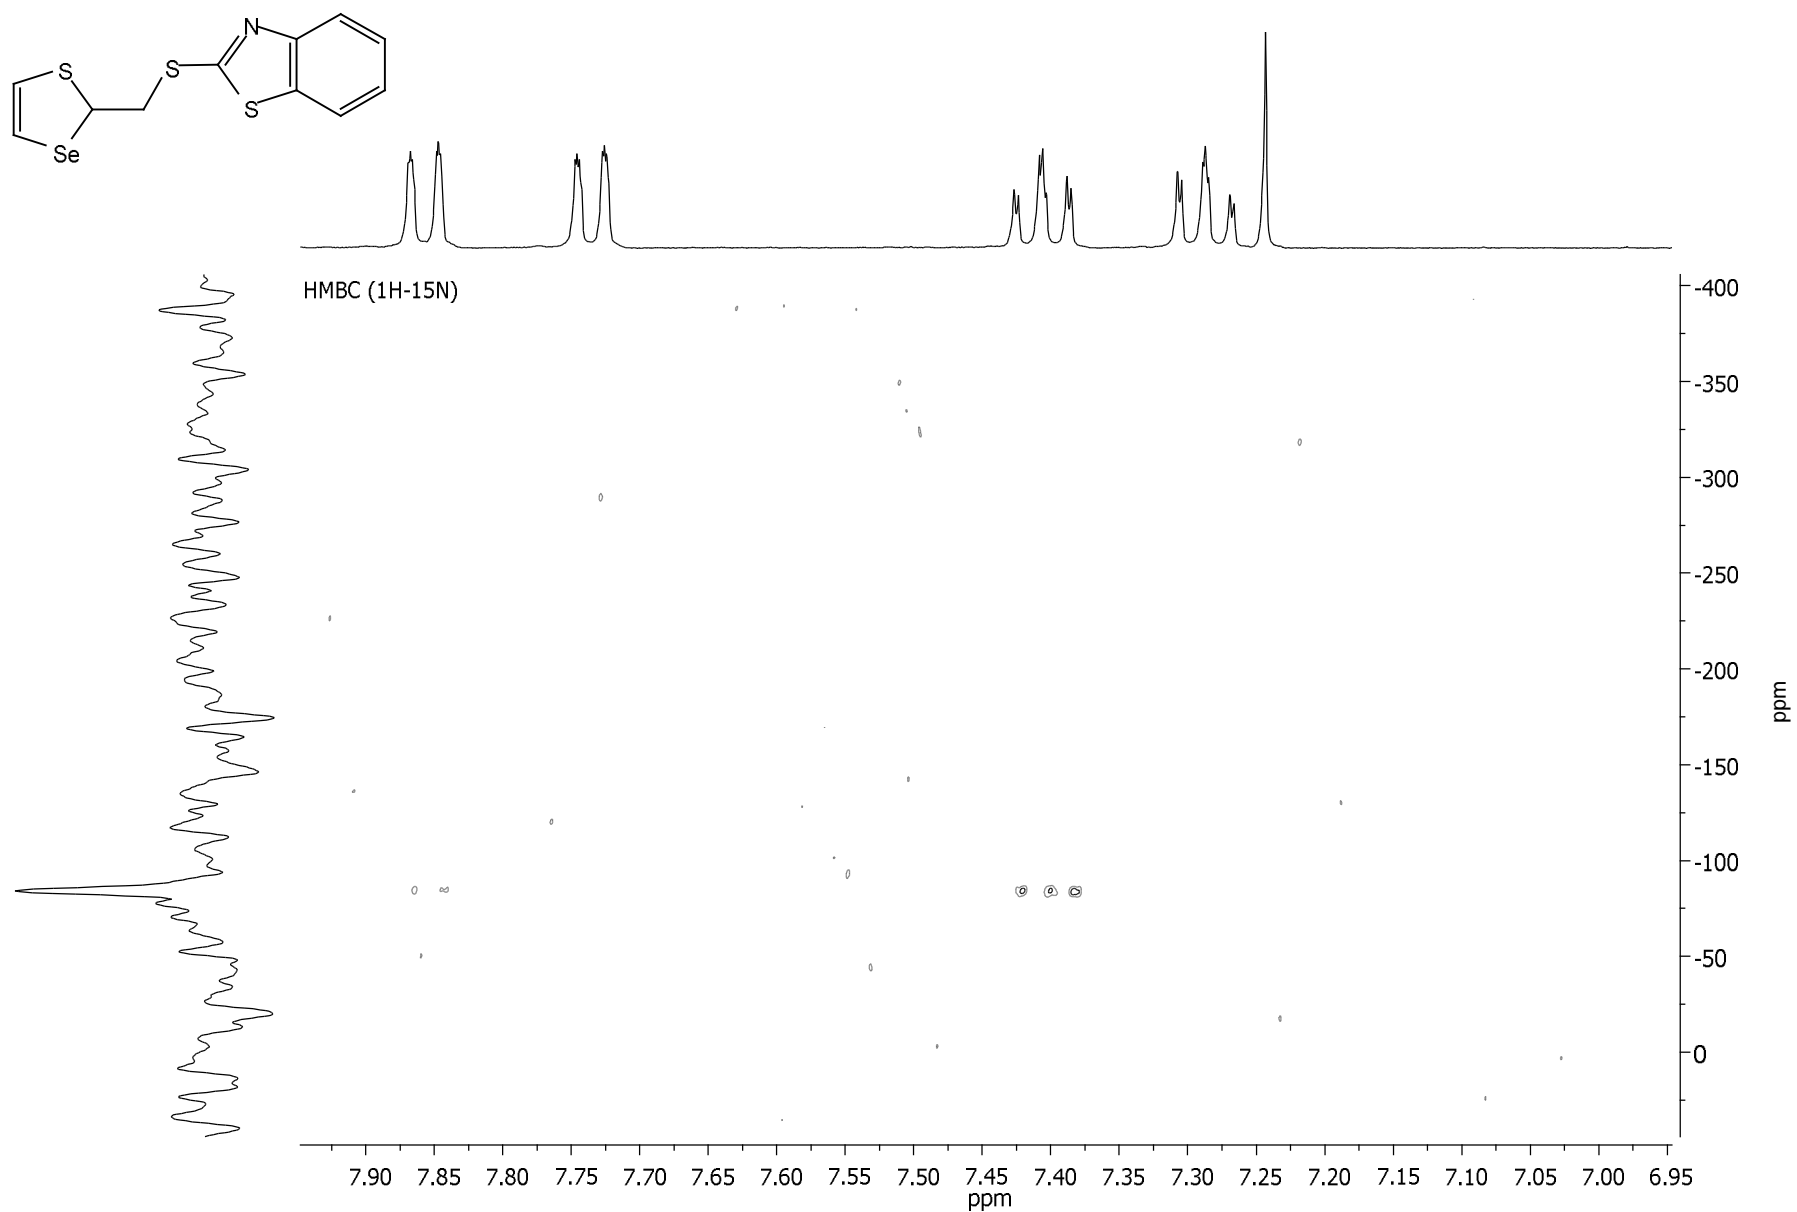

**Figure S10.** HMBC-( $^1\text{H}$ - $^{15}\text{N}$ )-NMR spectrum of 2-[(1,3-thiaselenol-2-ylmethyl)sulfanyl]-1,3-benzothiazole (5)

$^{77}\text{Se}$

— 517.55

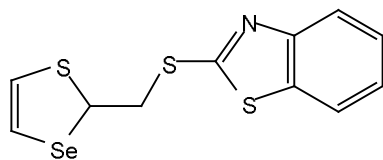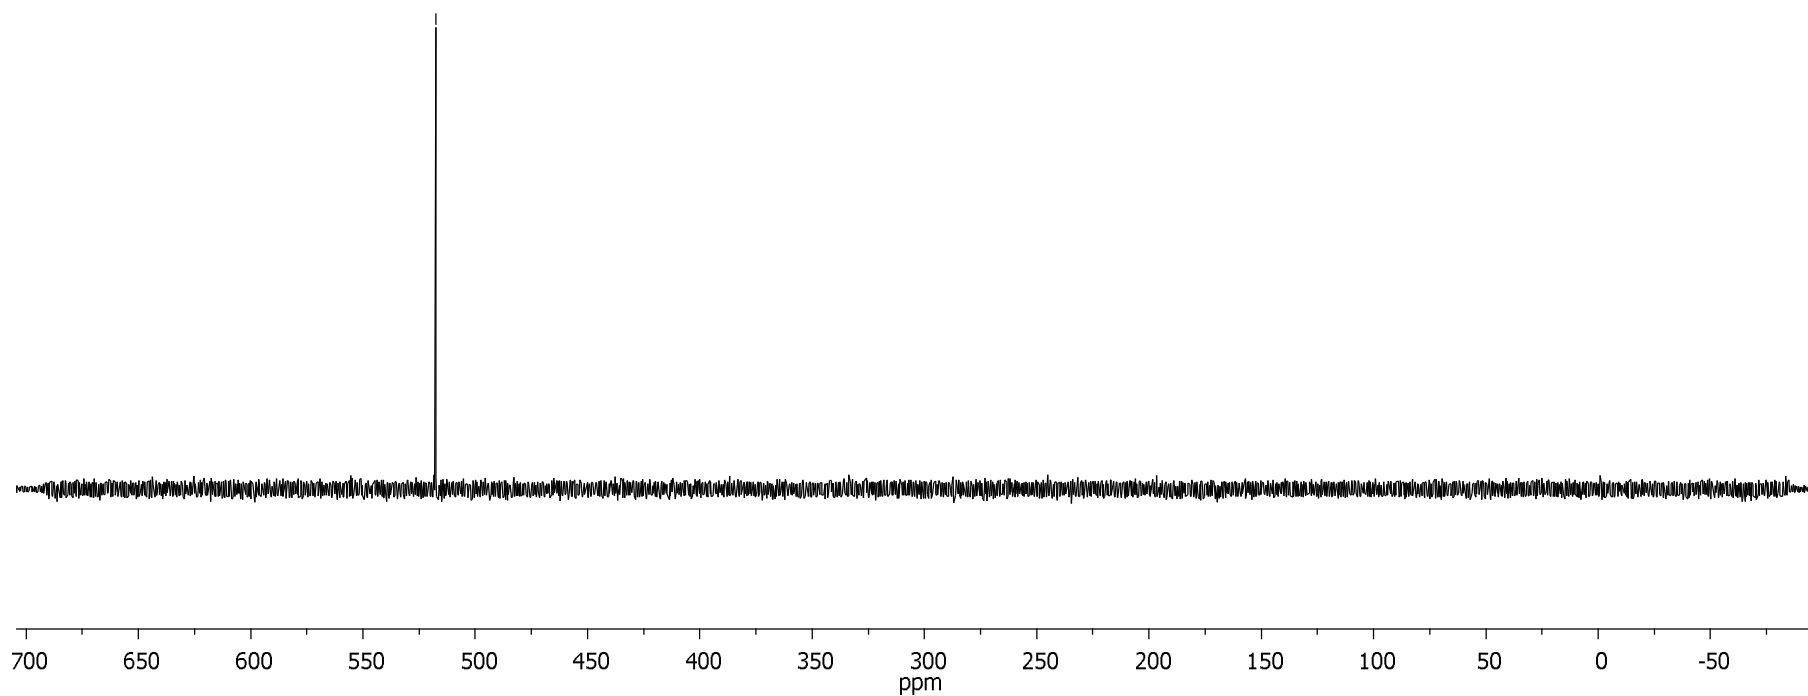

**Figure S11.**  $^{77}\text{Se}$ -NMR spectrum of 2-[(1,3-thiaselenol-2-ylmethyl)sulfanyl]-1,3-benzothiazole (5)

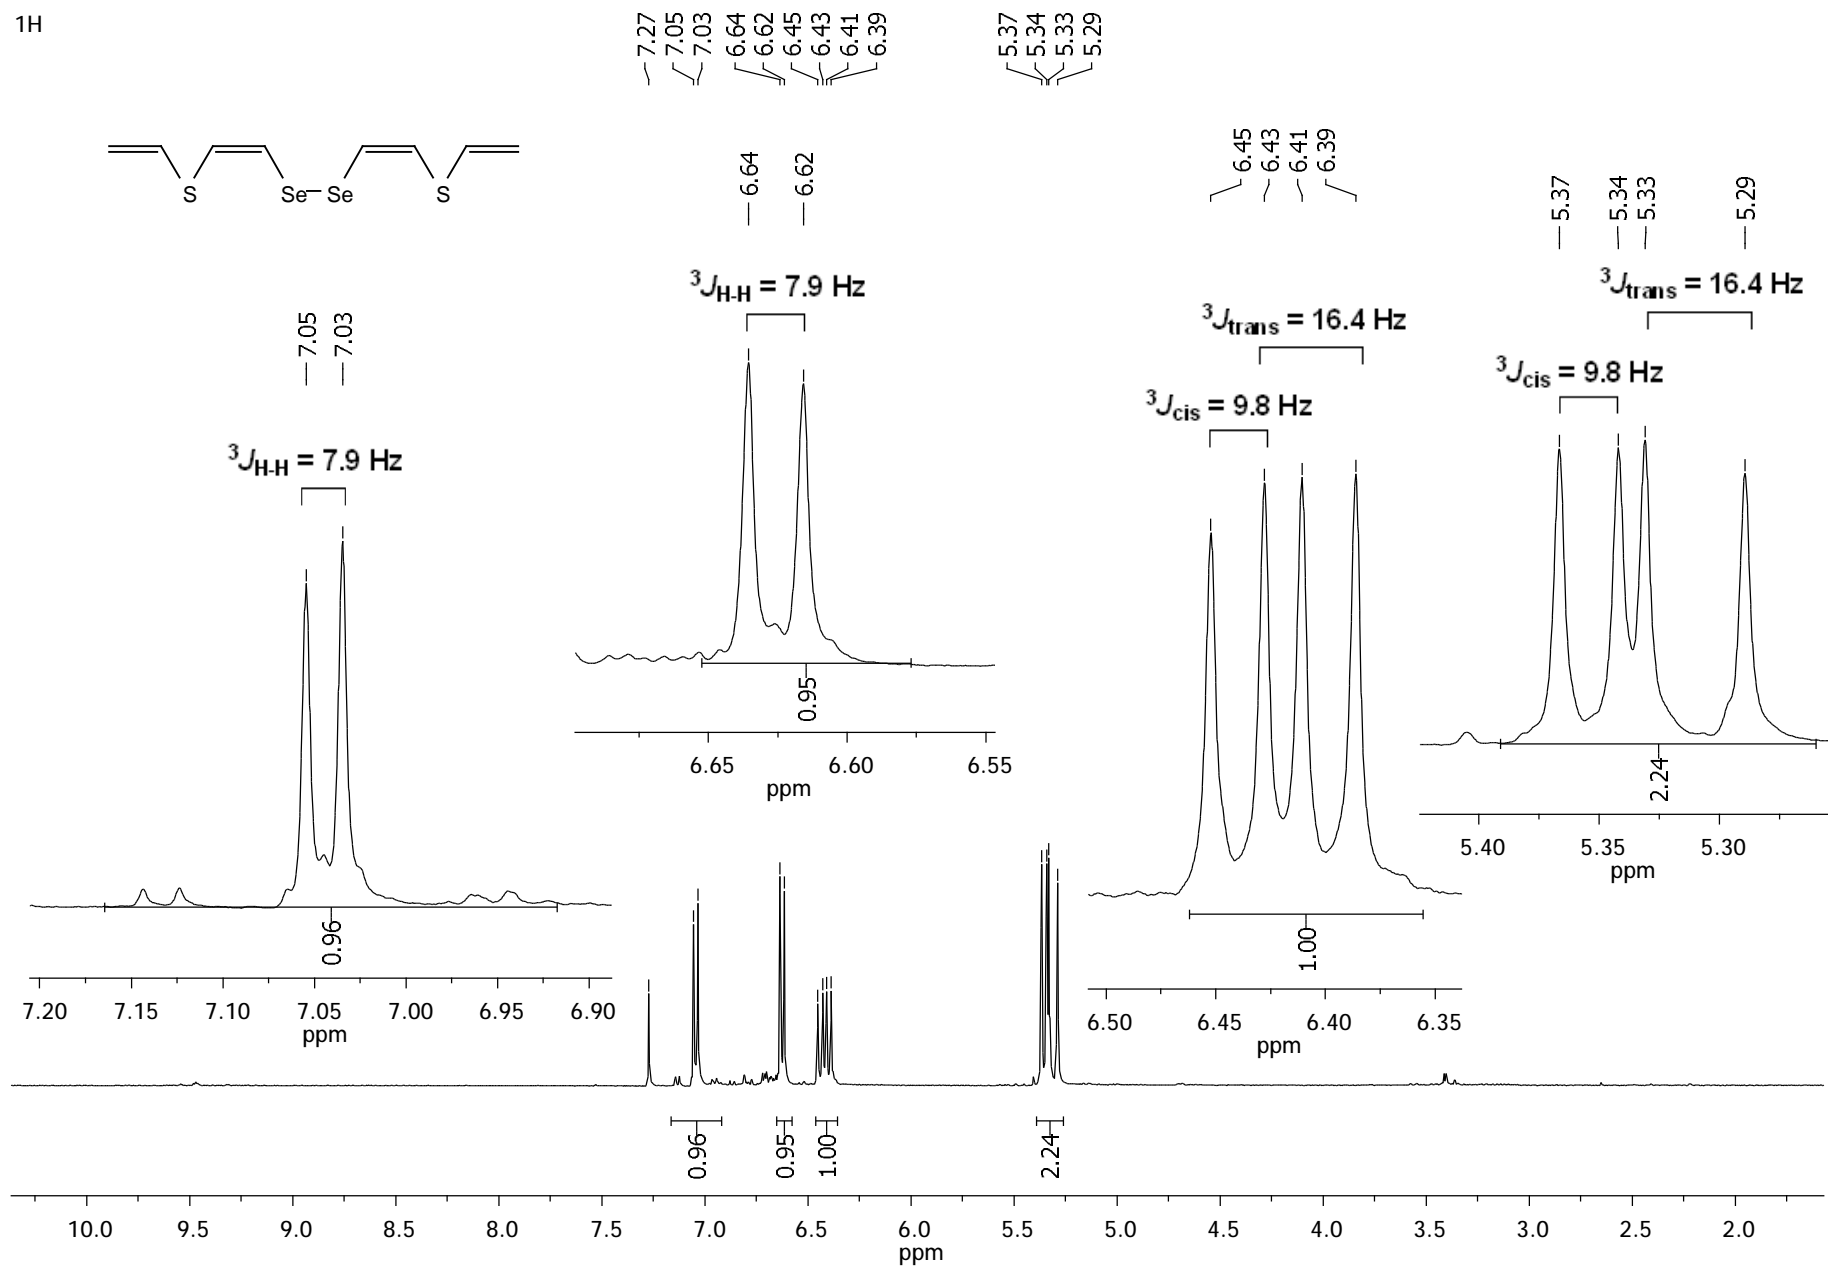

Figure S12. <sup>1</sup>H-NMR spectrum of 1,2-bis[(Z)-2-(vinylsulfanyl)ethenyl]diselane (6a)

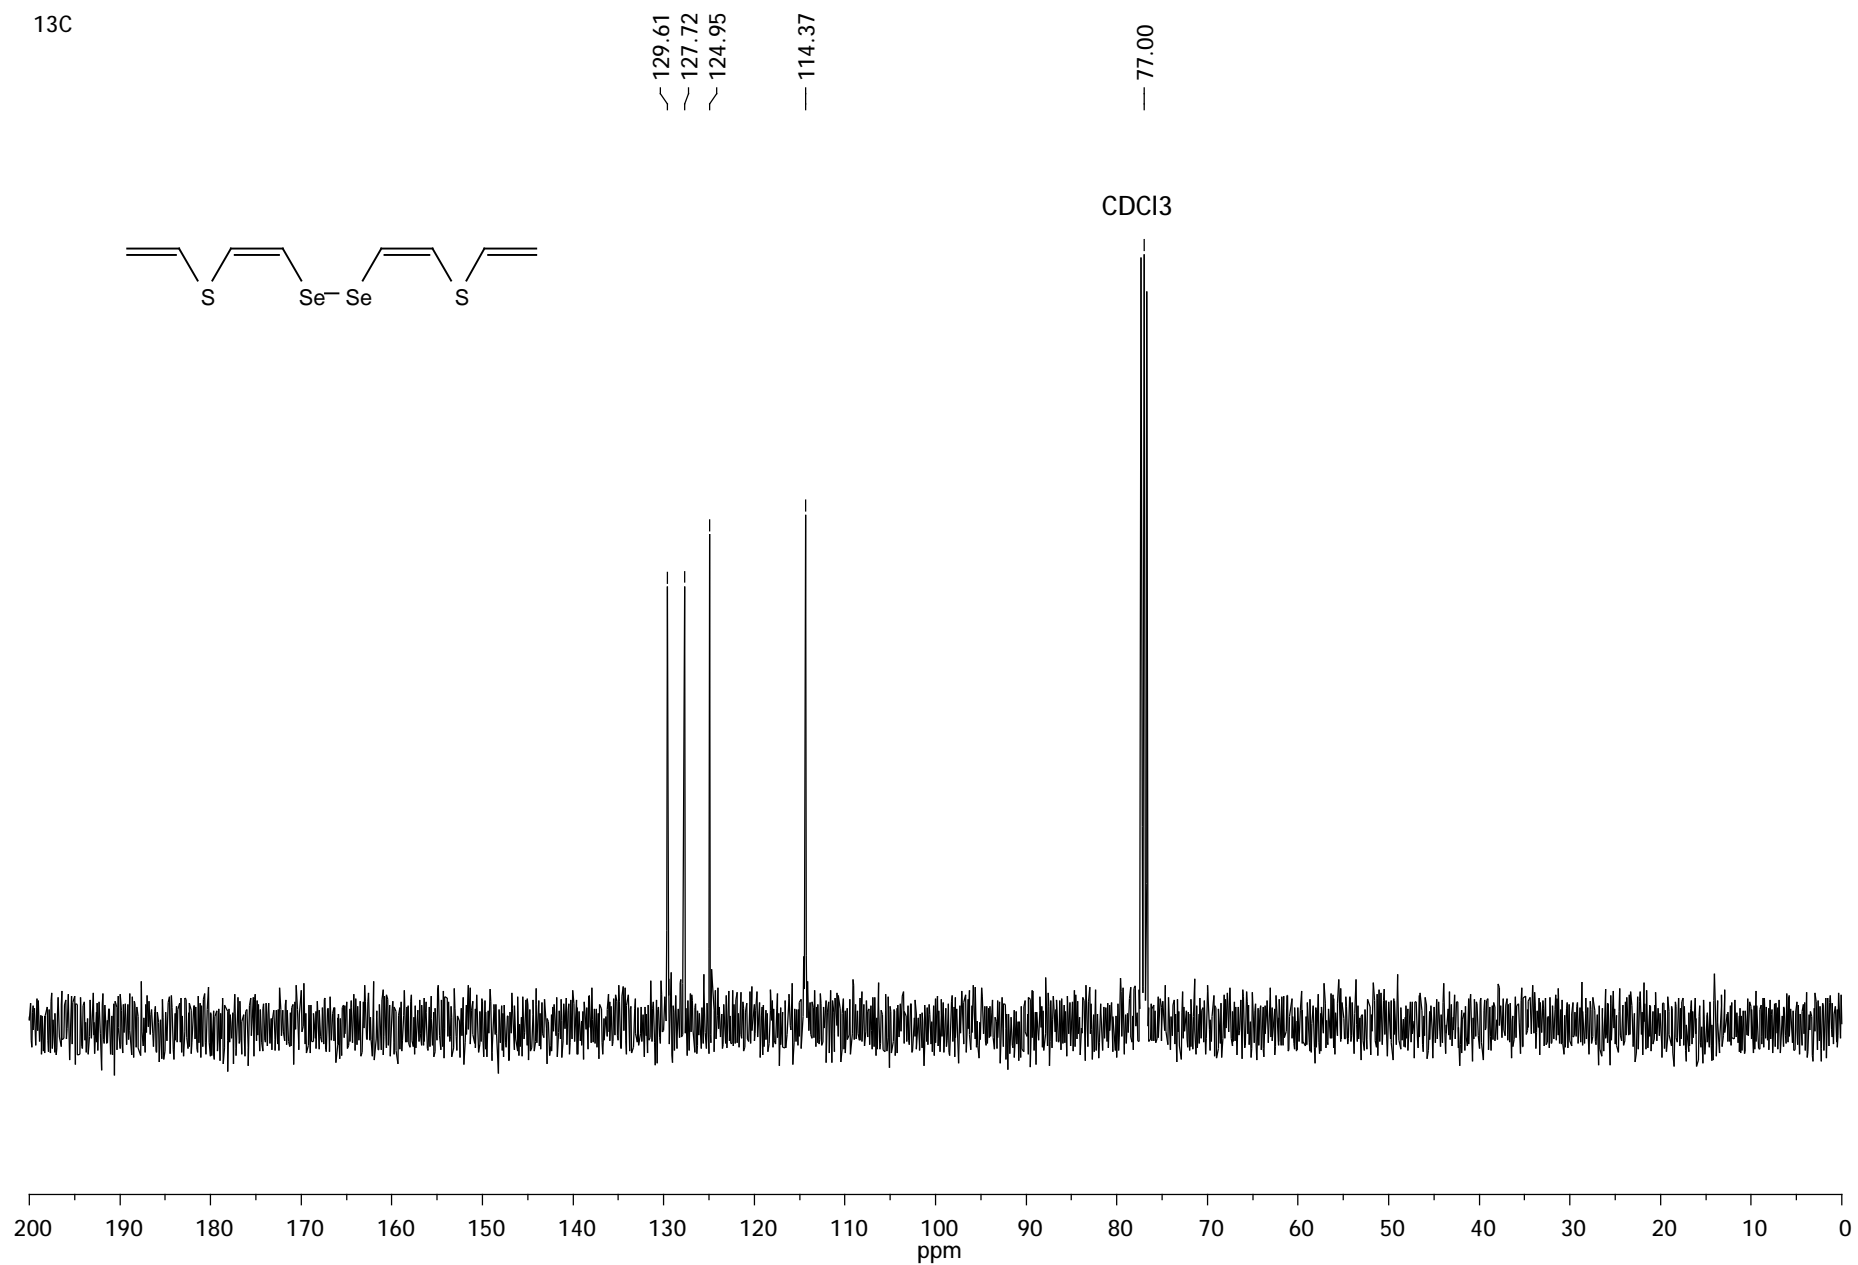

Figure S13. <sup>13</sup>C–NMR spectrum of 1,2-bis[(Z)-2-(vinylsulfanyl)ethenyl]diselane (6a)



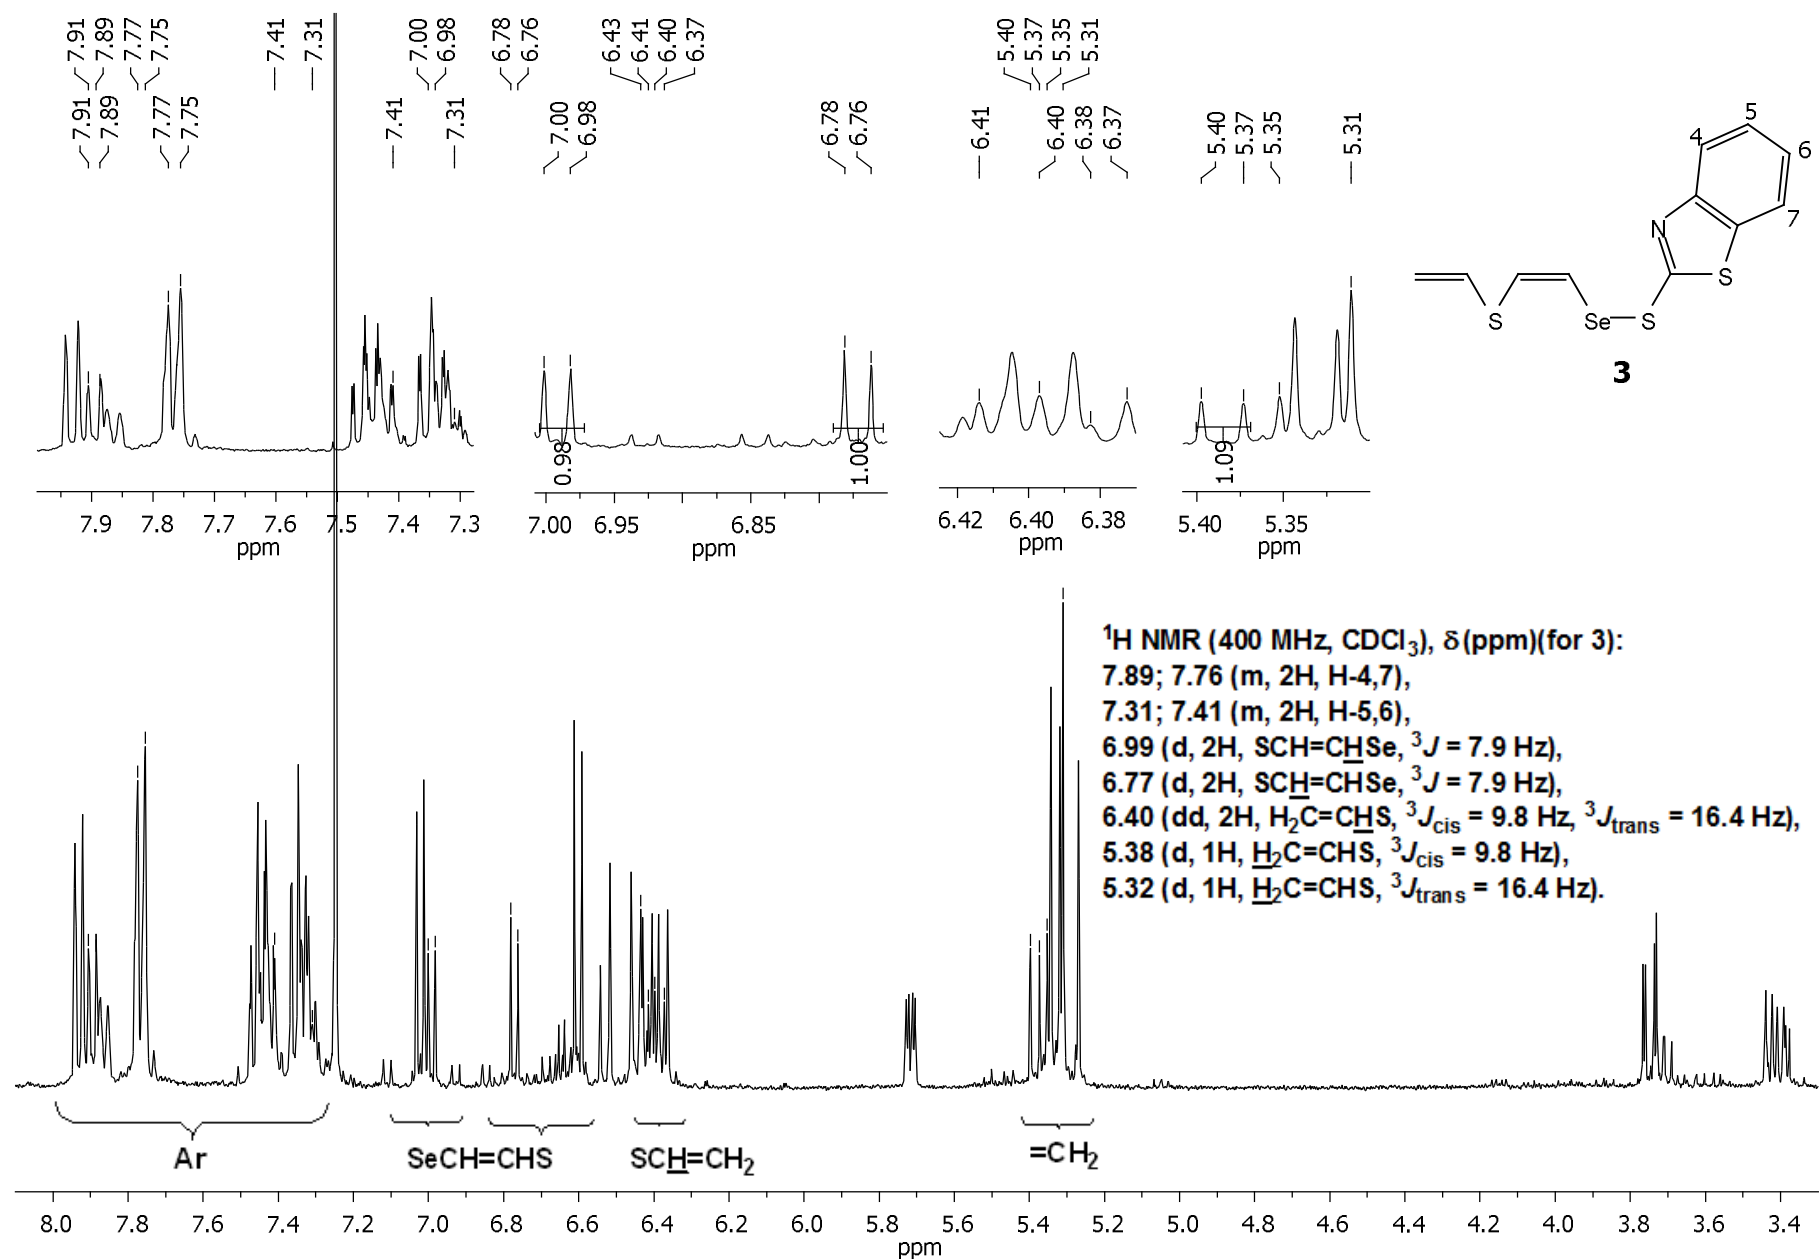

**Figure S14.** <sup>1</sup>H-NMR spectrum of (Z)-2-[(1,3-benzothiazol-2-ylsulfanyl)selenyl]ethenyl vinyl sulfide (3) in mixture (a 15 : 46 : 39 molar ratio of compounds 3, 4 and 6a) (Table 1, Run 7)

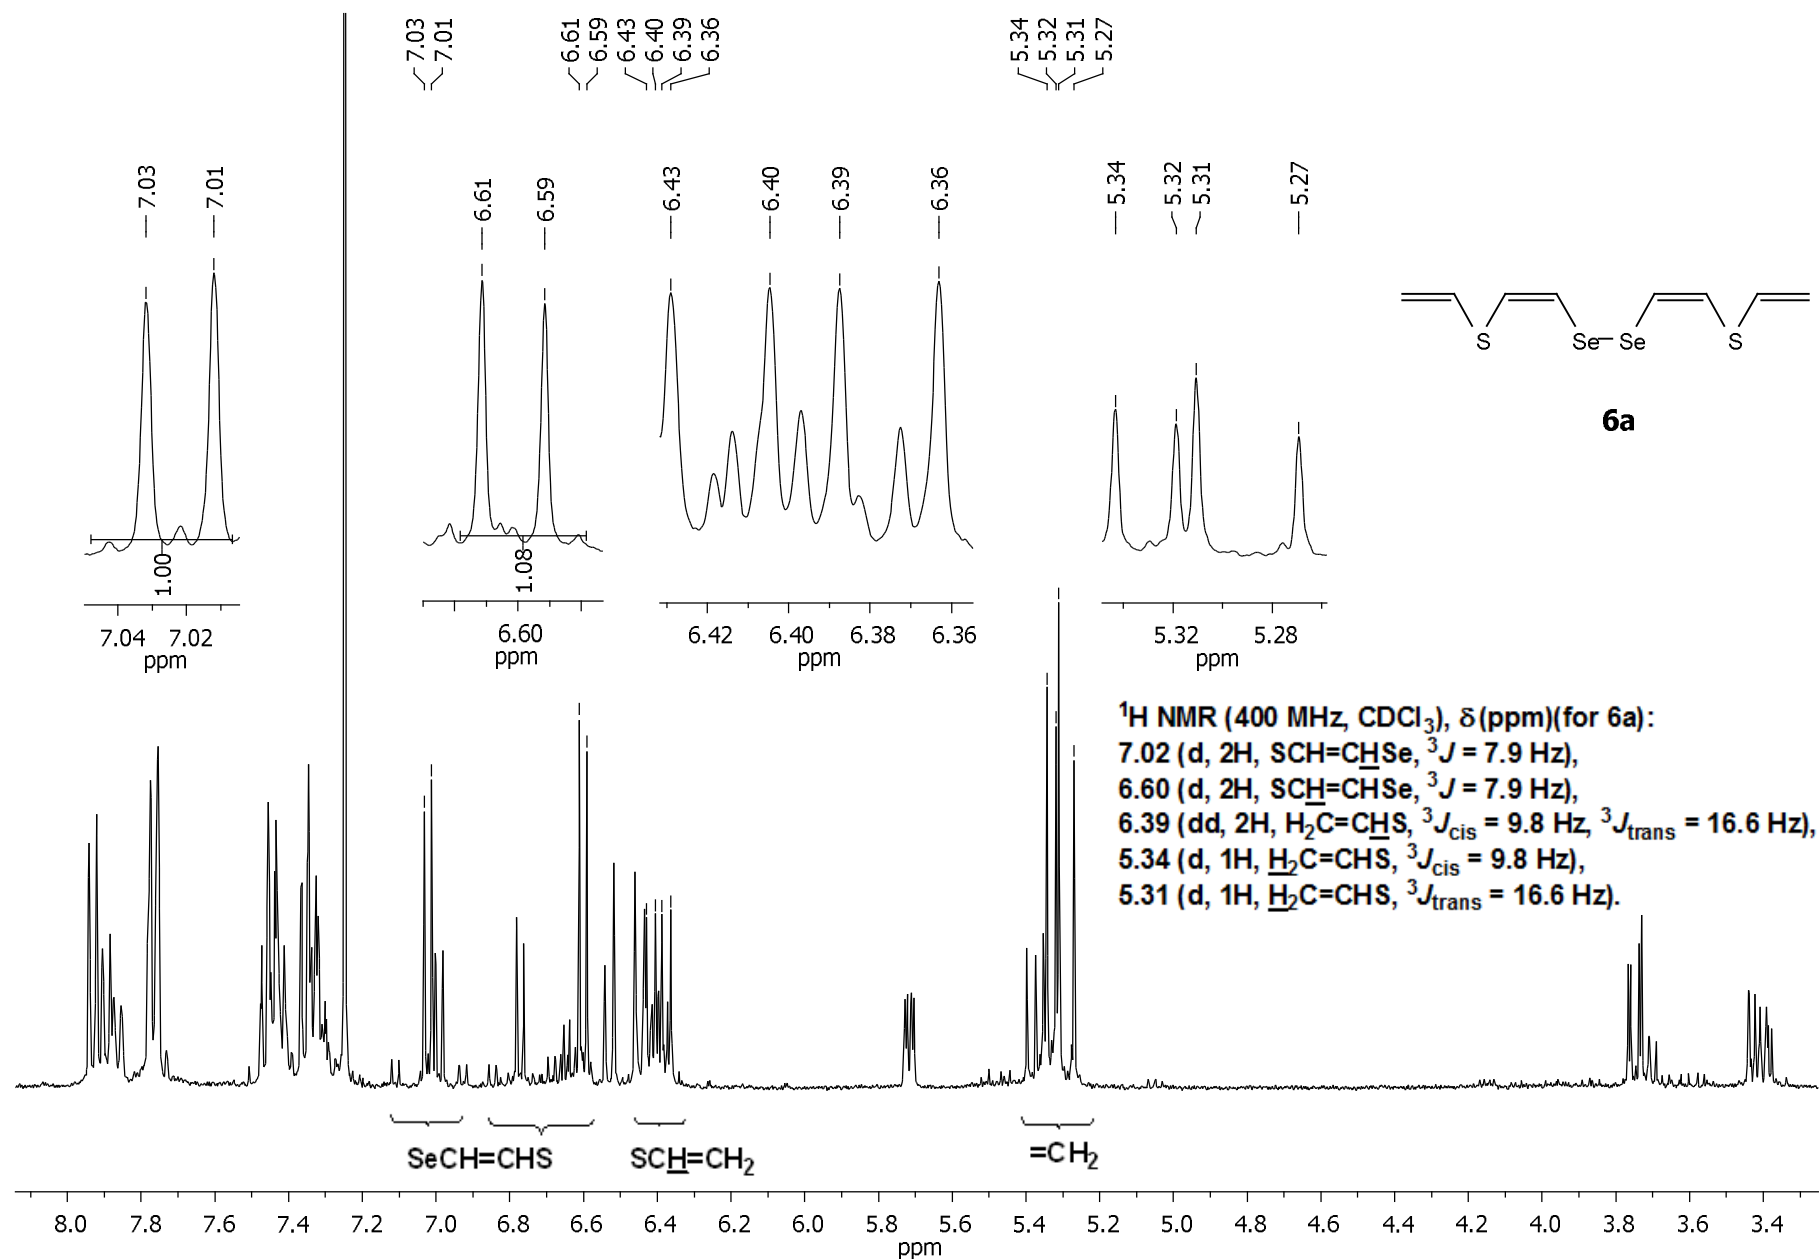

**Figure S15.** <sup>1</sup>H-NMR spectrum of 1,2-bis[(Z)-2-(vinylsulfanyl)ethenyl]diselane (6a) in mixture (a 15 : 46 : 39 molar ratio of compounds 3, 4 and 6a) (Table 1, Run 7)

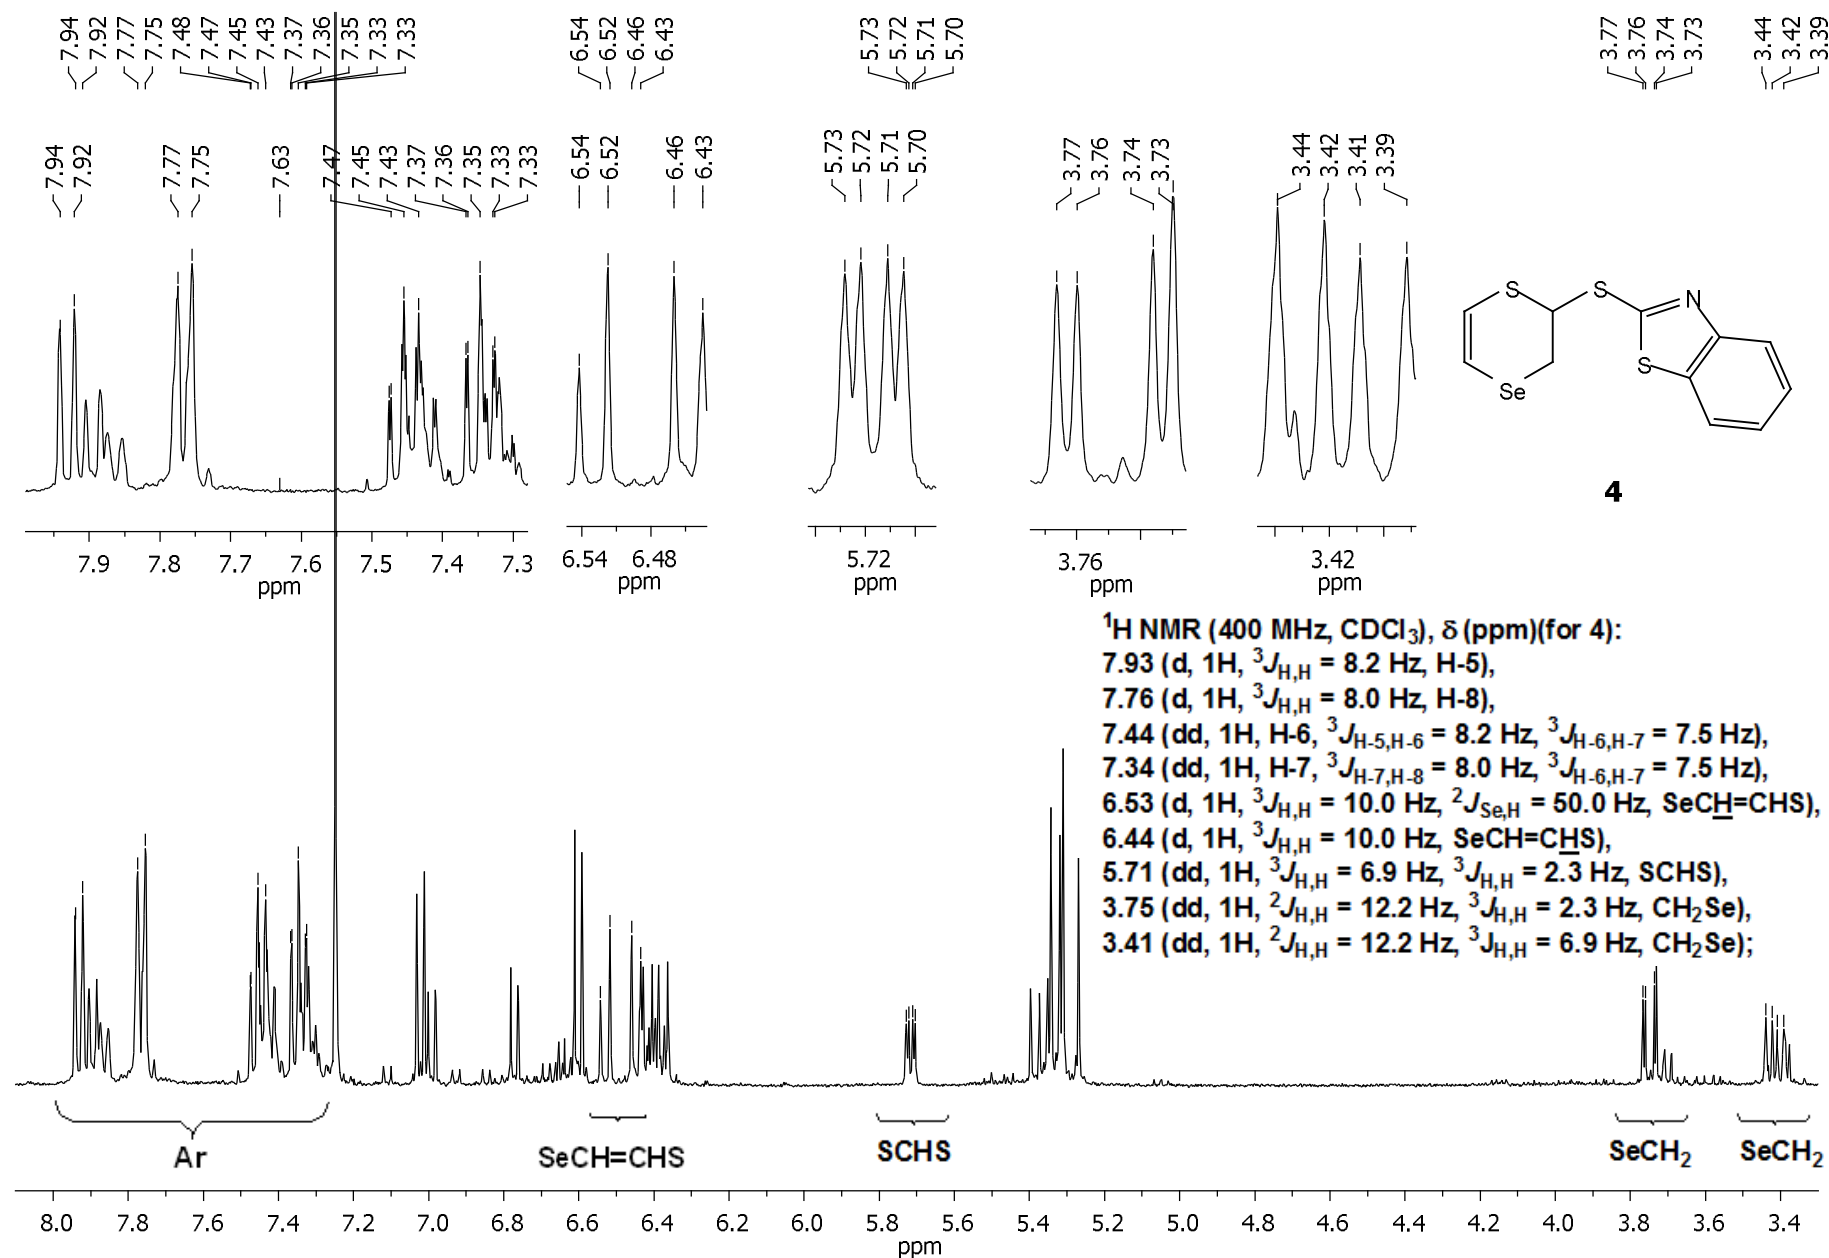

**Figure S16.** <sup>1</sup>H-NMR spectrum of 2-(2,3-dihydro-1,4-thiaselenin-2-ylsulfanyl)-1,3-benzothiazole (4) in mixture (a 15 : 46 : 39 molar ratio of compounds 3, 4 and 6a) (Table 1, Run 7)

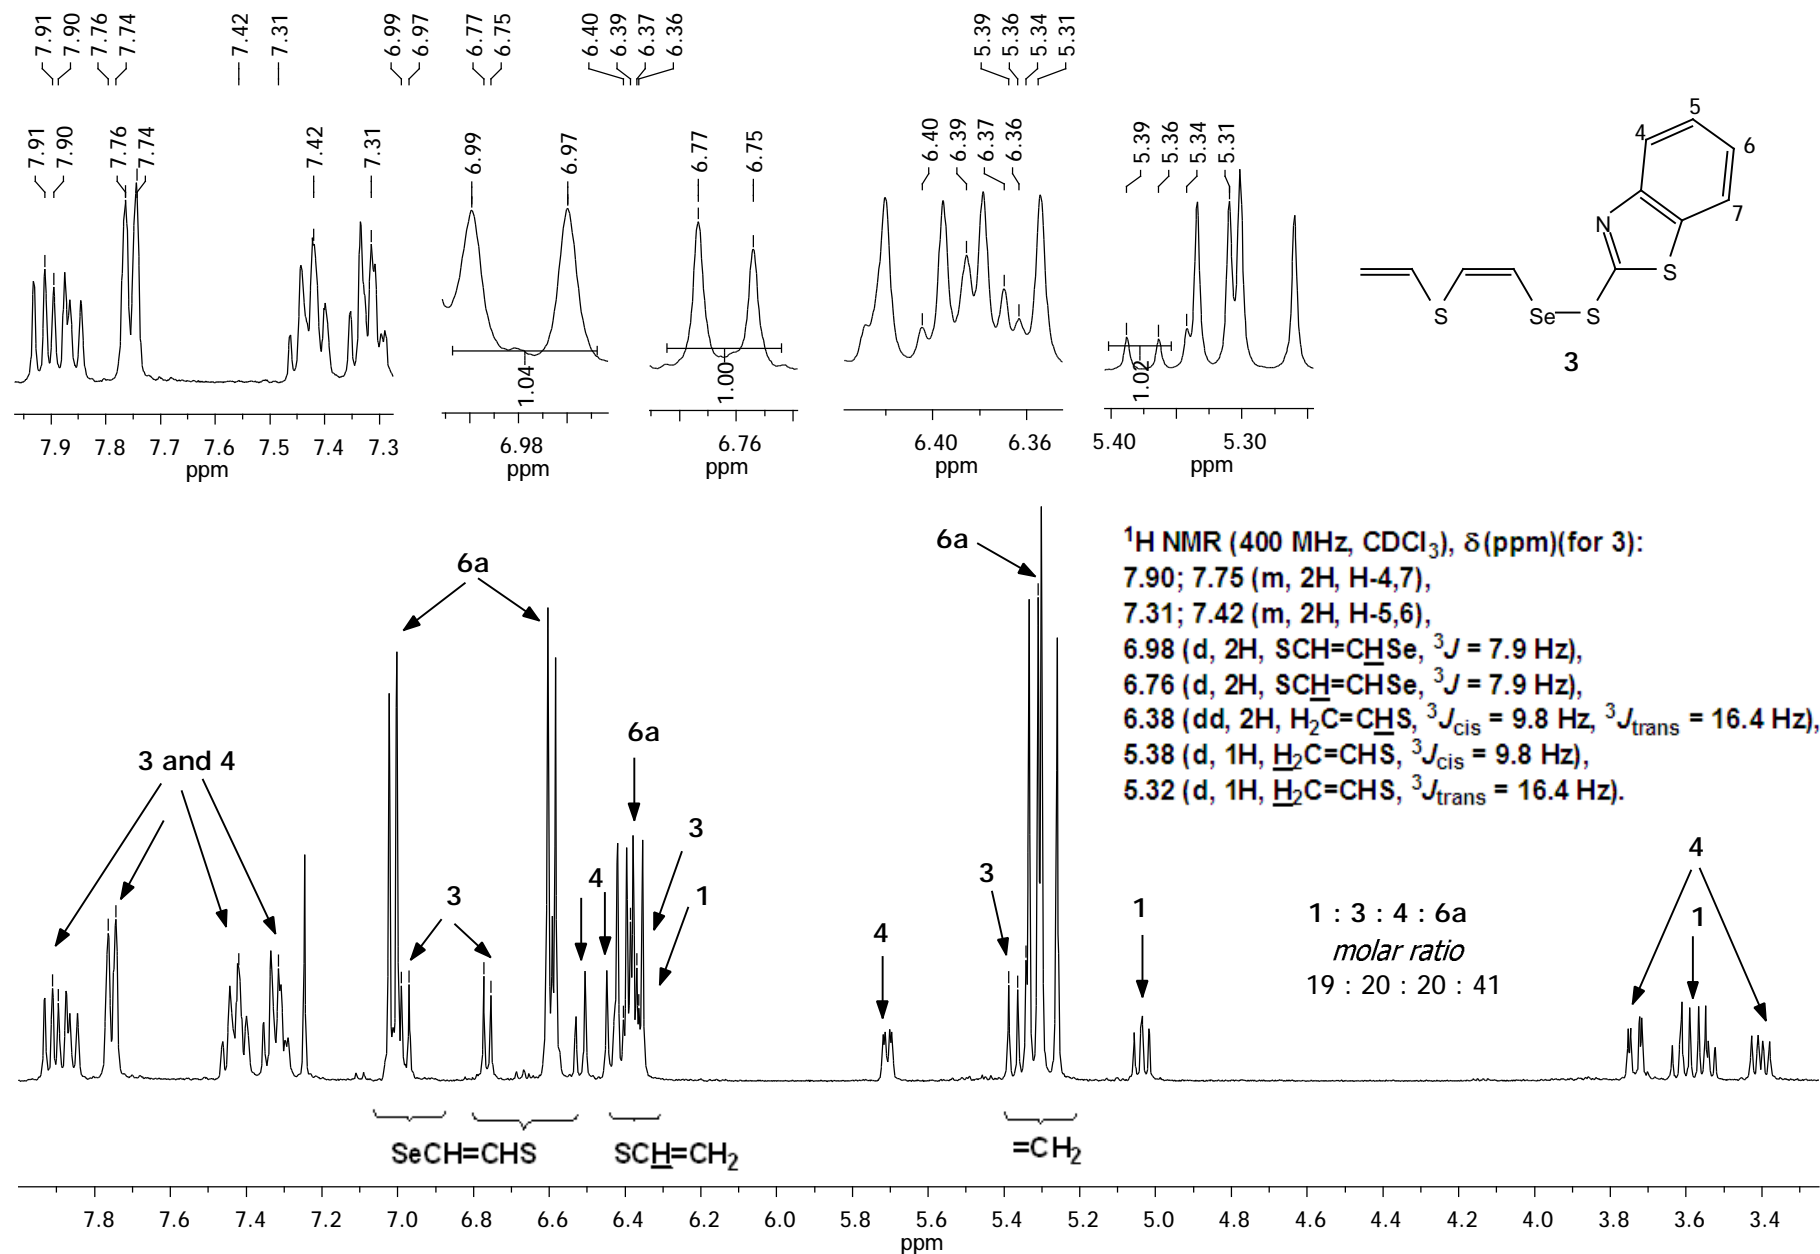

**Figure S17.** <sup>1</sup>H-NMR spectrum of (Z)-2-[(1,3-benzothiazol-2-ylsulfanyl)selenyl]ethenyl vinyl sulfide (3) in mixture (a 19 : 20 : 20 : 41 molar ratio of compounds 1, 3, 4 and 6a) (Table 1, Run 11)

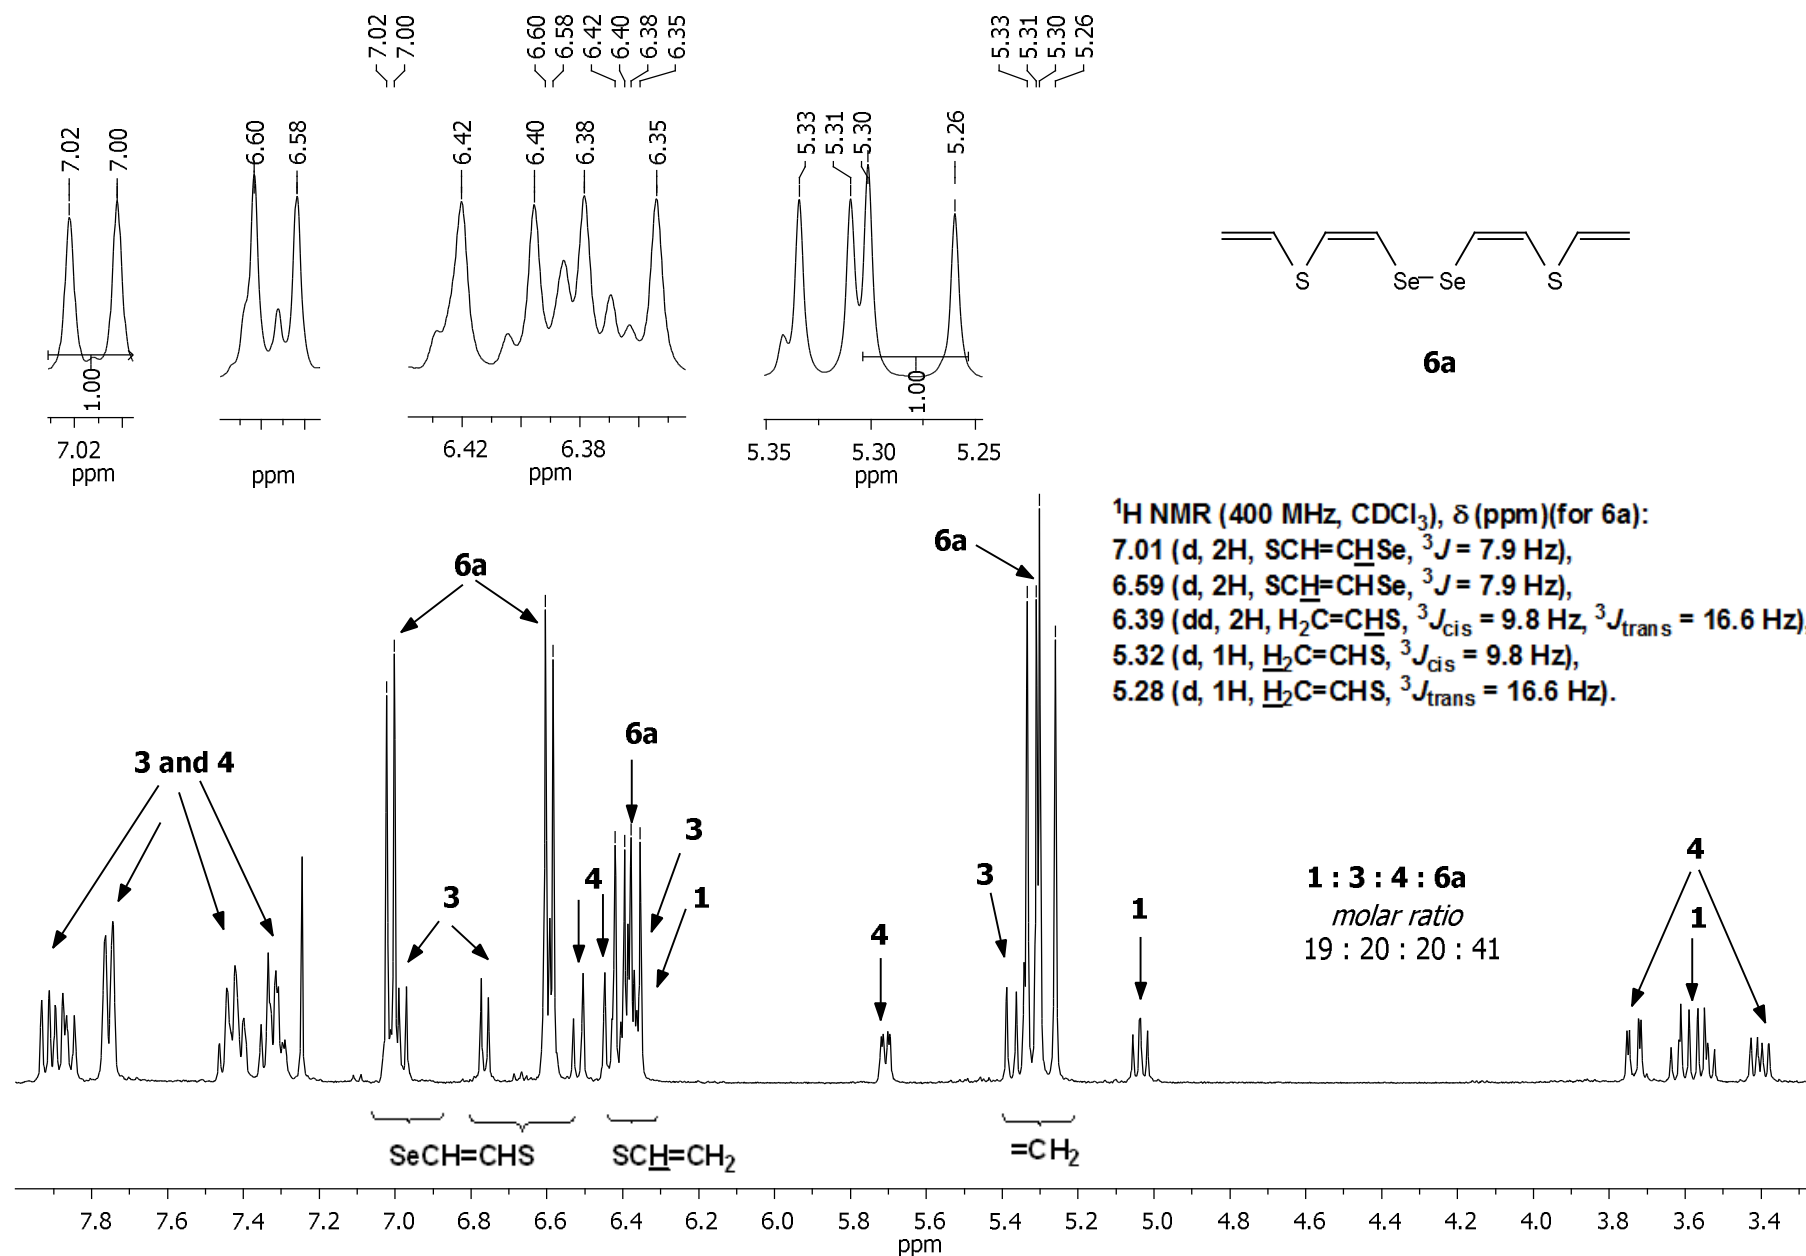

**Figure S18.** <sup>1</sup>H-NMR spectrum of 1,2-bis[(Z)-2-(vinylsulfanyl)ethenyl]diselane (**6a**) in mixture (a 19 : 20 : 20 : 41 molar ratio of compounds **1**, **3**, **4** and **6a**) (Table 1, Run 11)

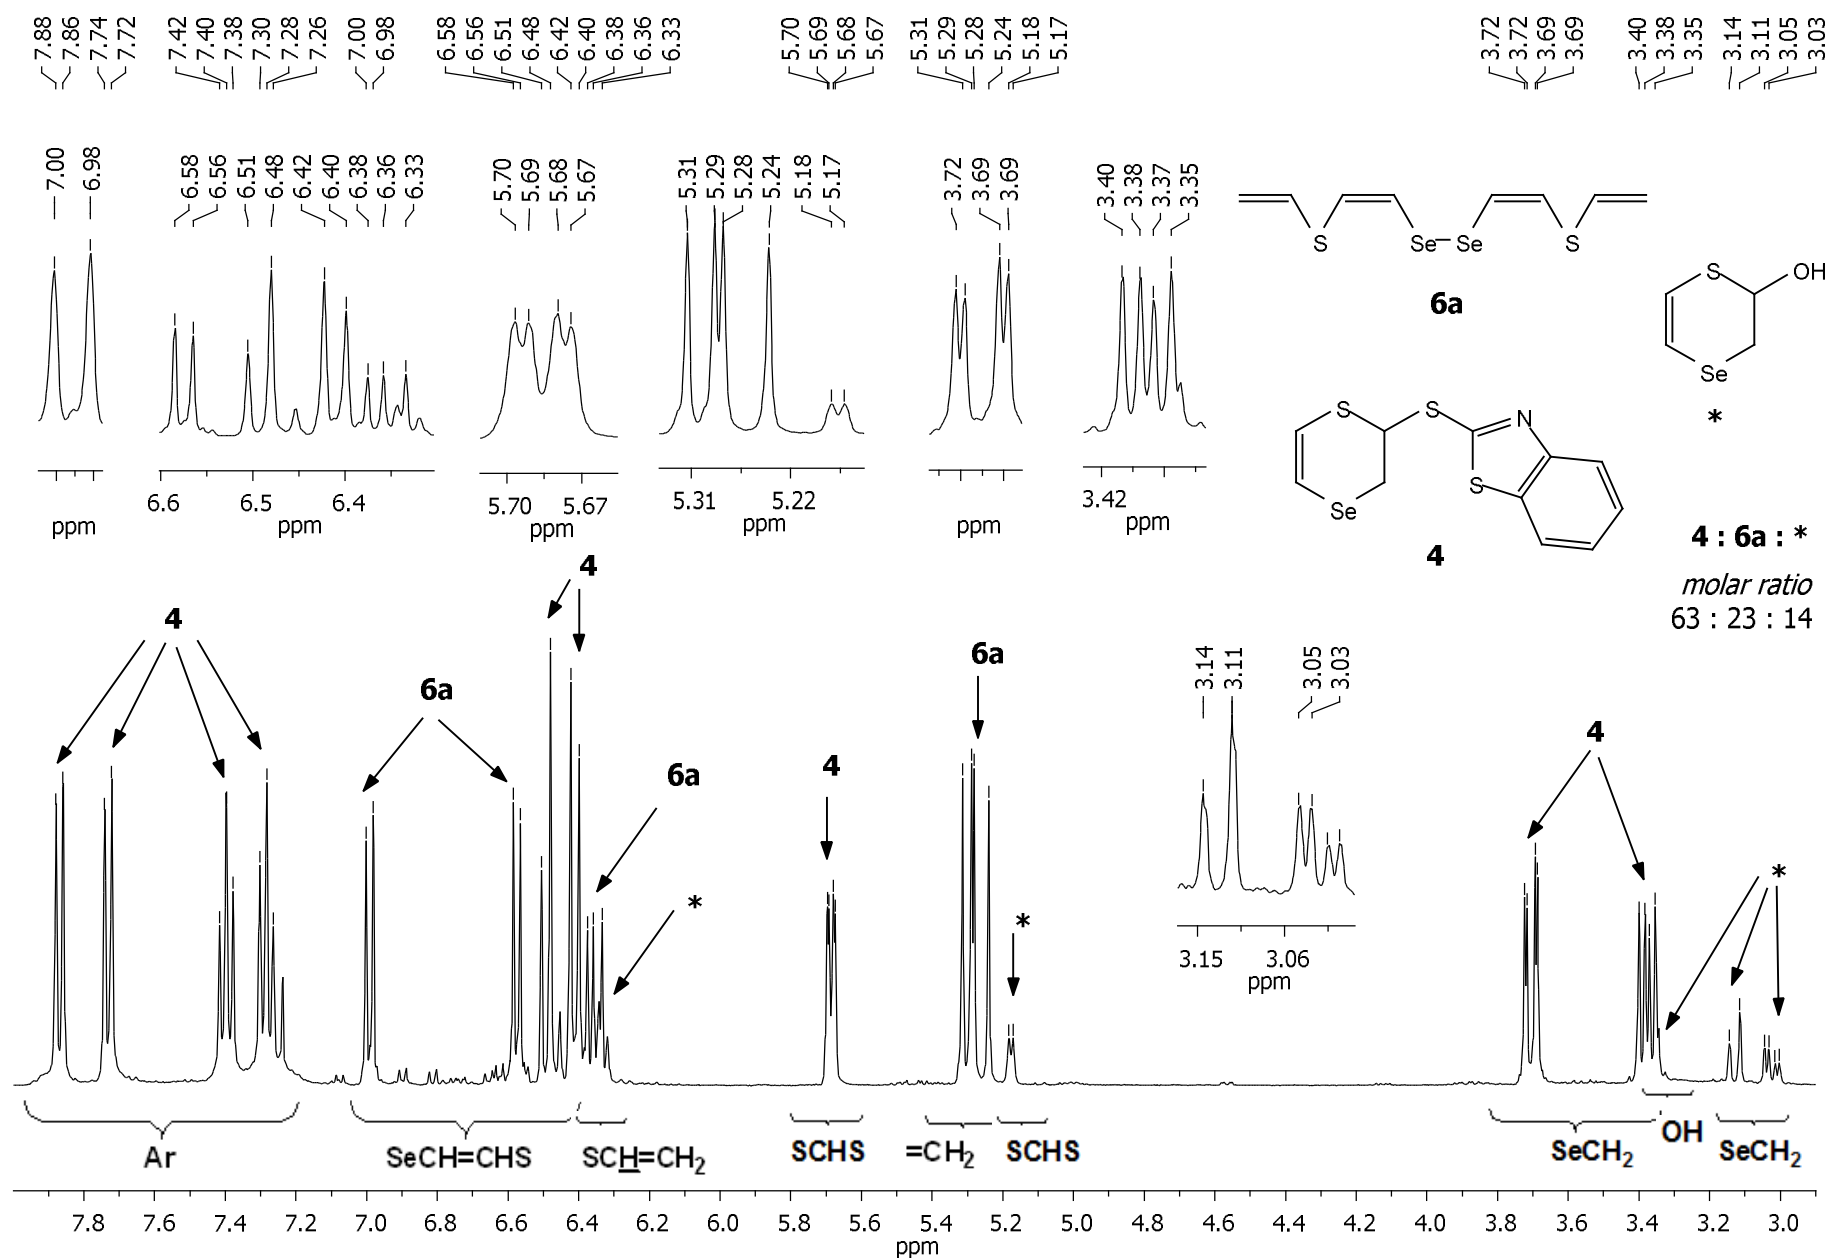

**Figure S19.** <sup>1</sup>H-NMR spectrum of mixture: compounds 4, 6a and 2,3-dihydro-1,4-thiaselenin-2-ol (\*) (molar ratio 63 : 23 : 14) (Table 1, Run 12)

# Quantum chemical calculations B3LYP/6-311+G(d,p)

**Table S1. Structure 1**

|                                                                                   |                                                           |              |              |              |
|-----------------------------------------------------------------------------------|-----------------------------------------------------------|--------------|--------------|--------------|
| 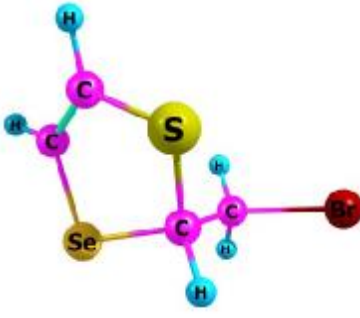 | 6                                                         | 1.744517000  | 1.741861000  | 0.536842000  |
|                                                                                   | 6                                                         | 2.479841000  | 0.651274000  | 0.741964000  |
|                                                                                   | 1                                                         | 1.968395000  | 2.709654000  | 0.968815000  |
|                                                                                   | 1                                                         | 3.368147000  | 0.612543000  | 1.357331000  |
|                                                                                   | 16                                                        | 0.325239000  | 1.682836000  | -0.516744000 |
|                                                                                   | 6                                                         | 0.131457000  | -0.148074000 | -0.518743000 |
|                                                                                   | 34                                                        | 1.926021000  | -0.952601000 | -0.140046000 |
|                                                                                   | 6                                                         | -0.856495000 | -0.666304000 | 0.509508000  |
|                                                                                   | 1                                                         | -0.866996000 | -1.754040000 | 0.528322000  |
|                                                                                   | 1                                                         | -0.657395000 | -0.273648000 | 1.503046000  |
|                                                                                   | 35                                                        | -2.724227000 | -0.138752000 | 0.073740000  |
|                                                                                   | 1                                                         | -0.148654000 | -0.447666000 | -1.526365000 |
|                                                                                   | Temperature 298.150 Kelvin. Pressure 1.00000 Atm.         |              |              |              |
|                                                                                   | Zero-point correction= 0.079622 (Hartree/Particle)        |              |              |              |
|                                                                                   | Thermal correction to Energy= 0.087576                    |              |              |              |
|                                                                                   | Thermal correction to Enthalpy= 0.088521                  |              |              |              |
|                                                                                   | Thermal correction to Gibbs Free Energy= 0.044164         |              |              |              |
|                                                                                   | Sum of electronic and zero-point Energies= -5529.282728   |              |              |              |
|                                                                                   | Sum of electronic and thermal Energies= -5529.274774      |              |              |              |
|                                                                                   | Sum of electronic and thermal Enthalpies= -5529.273830    |              |              |              |
|                                                                                   | Sum of electronic and thermal Free Energies= -5529.318186 |              |              |              |

**Table S2. Structure 2**

|                                                                                     |                                                           |              |              |              |
|-------------------------------------------------------------------------------------|-----------------------------------------------------------|--------------|--------------|--------------|
|  | 6                                                         | 2.075078000  | 1.255771000  | -0.000128000 |
|                                                                                     | 6                                                         | 0.811917000  | 0.668880000  | -0.000053000 |
|                                                                                     | 6                                                         | 0.646033000  | -0.733840000 | -0.000024000 |
|                                                                                     | 6                                                         | 1.775654000  | -1.559108000 | -0.000047000 |
|                                                                                     | 6                                                         | 3.035202000  | -0.976658000 | -0.000101000 |
|                                                                                     | 6                                                         | 3.184610000  | 0.417404000  | -0.000150000 |
|                                                                                     | 6                                                         | -1.488639000 | -0.187068000 | 0.000102000  |
|                                                                                     | 7                                                         | -0.668036000 | -1.177962000 | 0.000067000  |
|                                                                                     | 1                                                         | 2.194362000  | 2.332340000  | -0.000167000 |
|                                                                                     | 1                                                         | 1.644239000  | -2.634024000 | -0.000014000 |
|                                                                                     | 1                                                         | 3.916622000  | -1.607240000 | -0.000118000 |
|                                                                                     | 1                                                         | 4.177935000  | 0.850717000  | -0.000199000 |
|                                                                                     | 16                                                        | -0.767834000 | 1.439754000  | -0.000035000 |
|                                                                                     | 16                                                        | -3.249706000 | -0.335084000 | 0.000172000  |
|                                                                                     | 1                                                         | -3.215395000 | -1.683066000 | 0.000253000  |
|                                                                                     | Temperature 298.150 Kelvin. Pressure 1.00000 Atm.         |              |              |              |
|                                                                                     | Zero-point correction= 0.101134 (Hartree/Particle)        |              |              |              |
|                                                                                     | Thermal correction to Energy= 0.109357                    |              |              |              |
|                                                                                     | Thermal correction to Enthalpy= 0.110301                  |              |              |              |
|                                                                                     | Thermal correction to Gibbs Free Energy= 0.067535         |              |              |              |
|                                                                                     | Sum of electronic and zero-point Energies= -1120.916425   |              |              |              |
|                                                                                     | Sum of electronic and thermal Energies= -1120.908201      |              |              |              |
|                                                                                     | Sum of electronic and thermal Enthalpies= -1120.907257    |              |              |              |
|                                                                                     | Sum of electronic and thermal Free Energies= -1120.950024 |              |              |              |

**Table S3. Structure TS1 [(1-2) → (1<sup>+</sup>-2<sup>-</sup>).HBr]**

|                                                                                   |                                                           |              |              |              |
|-----------------------------------------------------------------------------------|-----------------------------------------------------------|--------------|--------------|--------------|
| 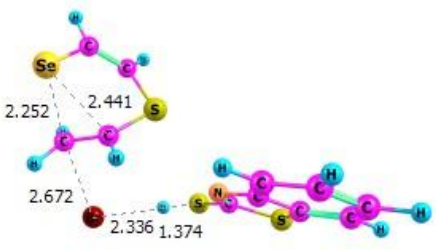 | 6                                                         | -2.450064000 | -0.824617000 | 2.157440000  |
|                                                                                   | 6                                                         | -3.557999000 | -1.372449000 | 1.643128000  |
|                                                                                   | 1                                                         | -2.333729000 | -0.620448000 | 3.214811000  |
|                                                                                   | 1                                                         | -4.397010000 | -1.662394000 | 2.264014000  |
|                                                                                   | 16                                                        | -0.973576000 | -0.631388000 | 1.198908000  |
|                                                                                   | 6                                                         | -1.688114000 | -0.387276000 | -0.354872000 |
|                                                                                   | 34                                                        | -3.753767000 | -1.681160000 | -0.222339000 |
|                                                                                   | 6                                                         | -2.881138000 | 0.353002000  | -0.638423000 |
|                                                                                   | 1                                                         | -3.146983000 | 0.500771000  | -1.670735000 |
|                                                                                   | 1                                                         | -3.381730000 | 0.938851000  | 0.114227000  |
|                                                                                   | 1                                                         | -1.043160000 | -0.657236000 | -1.181586000 |
|                                                                                   | 6                                                         | 5.156023000  | -1.401426000 | -0.176905000 |
|                                                                                   | 6                                                         | 4.086061000  | -0.539483000 | 0.055142000  |
|                                                                                   | 6                                                         | 2.779720000  | -0.844445000 | -0.387623000 |
|                                                                                   | 6                                                         | 2.554857000  | -2.039639000 | -1.080768000 |
|                                                                                   | 6                                                         | 3.619988000  | -2.897541000 | -1.316264000 |
|                                                                                   | 6                                                         | 4.910549000  | -2.582175000 | -0.868724000 |
|                                                                                   | 6                                                         | 2.313658000  | 1.096726000  | 0.570345000  |
|                                                                                   | 7                                                         | 1.807471000  | 0.093550000  | -0.069815000 |
|                                                                                   | 1                                                         | 6.154144000  | -1.159131000 | 0.167280000  |
|                                                                                   | 1                                                         | 1.555473000  | -2.277743000 | -1.424608000 |
|                                                                                   | 1                                                         | 3.453178000  | -3.823591000 | -1.854111000 |
|                                                                                   | 1                                                         | 5.729025000  | -3.265119000 | -1.064073000 |
|                                                                                   | 16                                                        | 4.068978000  | 1.012522000  | 0.870355000  |
|                                                                                   | 16                                                        | 1.451118000  | 2.500590000  | 1.182014000  |
|                                                                                   | 35                                                        | -1.423582000 | 2.532325000  | -1.155571000 |
|                                                                                   | 1                                                         | 0.406405000  | 2.427605000  | 0.292718000  |
|                                                                                   | Temperature 298.150 Kelvin. Pressure 1.00000 Atm.         |              |              |              |
|                                                                                   | Zero-point correction= 0.178889 (Hartree/Particle)        |              |              |              |
|                                                                                   | Thermal correction to Energy= 0.196344                    |              |              |              |
|                                                                                   | Thermal correction to Enthalpy= 0.197288                  |              |              |              |
|                                                                                   | Thermal correction to Gibbs Free Energy= 0.128592         |              |              |              |
|                                                                                   | Sum of electronic and zero-point Energies= -6650.154448   |              |              |              |
|                                                                                   | Sum of electronic and thermal Energies= -6650.136993      |              |              |              |
|                                                                                   | Sum of electronic and thermal Enthalpies= -6650.136049    |              |              |              |
|                                                                                   | Sum of electronic and thermal Free Energies= -6650.204746 |              |              |              |

**Table S4. Structure (1<sup>+</sup>-2<sup>-</sup>).HBr**

|                                                                                     |    |              |              |              |
|-------------------------------------------------------------------------------------|----|--------------|--------------|--------------|
| 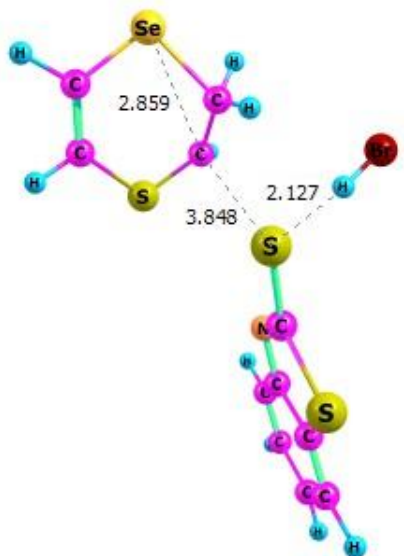 | 6  | 2.401659000  | -0.814962000 | -1.754583000 |
|                                                                                     | 6  | 3.685931000  | -0.955533000 | -1.396026000 |
|                                                                                     | 1  | 2.117433000  | -0.615558000 | -2.780414000 |
|                                                                                     | 1  | 4.451482000  | -0.920265000 | -2.163541000 |
|                                                                                     | 16 | 0.987258000  | -1.176224000 | -0.760342000 |
|                                                                                     | 6  | 1.543027000  | -1.161422000 | 0.785112000  |
|                                                                                     | 34 | 4.368395000  | -1.206089000 | 0.348305000  |
|                                                                                     | 6  | 2.756018000  | -0.442734000 | 1.238550000  |
|                                                                                     | 1  | 2.912481000  | -0.554461000 | 2.309135000  |
|                                                                                     | 1  | 2.730121000  | 0.618157000  | 0.982720000  |
|                                                                                     | 1  | 0.836025000  | -1.564765000 | 1.499149000  |
|                                                                                     | 6  | -5.515057000 | -0.513991000 | 0.003023000  |
|                                                                                     | 6  | -4.175533000 | -0.273077000 | -0.297433000 |
|                                                                                     | 6  | -3.132884000 | -0.888283000 | 0.432700000  |
|                                                                                     | 6  | -3.452431000 | -1.762187000 | 1.478811000  |
|                                                                                     | 6  | -4.786028000 | -2.004090000 | 1.776708000  |
|                                                                                     | 6  | -5.810082000 | -1.385360000 | 1.045603000  |
|                                                                                     | 6  | -1.856270000 | 0.278855000  | -0.963027000 |
|                                                                                     | 7  | -1.849615000 | -0.552427000 | 0.034404000  |
|                                                                                     | 1  | -6.308272000 | -0.037080000 | -0.560035000 |



|                                                   |              |              |                             |
|---------------------------------------------------|--------------|--------------|-----------------------------|
| 1                                                 | -2.654401000 | -2.232983000 | 2.040387000                 |
| 1                                                 | -5.040783000 | -2.678655000 | 2.586031000                 |
| 1                                                 | -6.845477000 | -1.586916000 | 1.294780000                 |
| 16                                                | -3.480568000 | 0.751822000  | -1.538431000                |
| 16                                                | -0.443007000 | 0.940000000  | -1.754290000                |
| 35                                                | 0.828637000  | 2.958950000  | 0.960721000                 |
| 1                                                 | 0.251921000  | 2.170442000  | -0.164260000                |
| Temperature 298.150 Kelvin. Pressure 1.00000 Atm. |              |              |                             |
| Zero-point correction=                            |              |              | 0.178856 (Hartree/Particle) |
| Thermal correction to Energy=                     |              |              | 0.197284                    |
| Thermal correction to Enthalpy=                   |              |              | 0.198228                    |
| Thermal correction to Gibbs Free Energy=          |              |              | 0.125568                    |
| Sum of electronic and zero-point Energies=        |              |              | -6650.158098                |
| Sum of electronic and thermal Energies=           |              |              | -6650.139670                |
| Sum of electronic and thermal Enthalpies=         |              |              | -6650.138726                |
| Sum of electronic and thermal Free Energies=      |              |              | -6650.211386                |

**Table S5. Structure TS2  $[(1^{+}2^{-})\cdot\text{HBr} \rightarrow 3\cdot\text{HBr}]$**

|                                                   |              |              |                             |
|---------------------------------------------------|--------------|--------------|-----------------------------|
| 6                                                 | -3.359704000 | 0.460022000  | 1.249495000                 |
| 6                                                 | -2.259499000 | 0.330590000  | 0.497246000                 |
| 1                                                 | -3.463488000 | 1.300586000  | 1.925205000                 |
| 1                                                 | -1.486847000 | 1.088210000  | 0.541795000                 |
| 16                                                | -4.811159000 | -0.541311000 | 1.148284000                 |
| 6                                                 | -4.164814000 | -2.062828000 | 0.614983000                 |
| 34                                                | -1.868032000 | -1.102193000 | -0.701201000                |
| 6                                                 | -2.913761000 | -2.549514000 | 0.913315000                 |
| 1                                                 | -2.646097000 | -3.541084000 | 0.570589000                 |
| 1                                                 | -2.339442000 | -2.141247000 | 1.733966000                 |
| 6                                                 | 4.776068000  | -1.749018000 | 0.202726000                 |
| 6                                                 | 3.596217000  | -1.102226000 | -0.167410000                |
| 6                                                 | 3.032507000  | -0.086935000 | 0.640073000                 |
| 6                                                 | 3.661435000  | 0.281751000  | 1.838592000                 |
| 6                                                 | 4.830257000  | -0.365795000 | 2.202542000                 |
| 6                                                 | 5.383481000  | -1.372090000 | 1.392813000                 |
| 6                                                 | 1.502350000  | -0.054750000 | -0.996414000                |
| 7                                                 | 1.871616000  | 0.470120000  | 0.141471000                 |
| 1                                                 | 5.207343000  | -2.523585000 | -0.419500000                |
| 1                                                 | 3.228900000  | 1.061280000  | 2.453319000                 |
| 1                                                 | 5.328003000  | -0.091462000 | 3.125117000                 |
| 1                                                 | 6.300001000  | -1.861962000 | 1.700391000                 |
| 16                                                | 2.593657000  | -1.330895000 | -1.580688000                |
| 16                                                | 0.123041000  | 0.416695000  | -1.946287000                |
| 35                                                | -0.190061000 | 3.267671000  | -0.037866000                |
| 1                                                 | 0.785106000  | 2.061874000  | 0.292502000                 |
| 1                                                 | -4.845440000 | -2.624437000 | -0.016271000                |
| Temperature 298.150 Kelvin. Pressure 1.00000 Atm. |              |              |                             |
| Zero-point correction=                            |              |              | 0.176895 (Hartree/Particle) |
| Thermal correction to Energy=                     |              |              | 0.193225                    |
| Thermal correction to Enthalpy=                   |              |              | 0.194169                    |
| Thermal correction to Gibbs Free Energy=          |              |              | 0.129299                    |
| Sum of electronic and zero-point Energies=        |              |              | -6650.158717                |
| Sum of electronic and thermal Energies=           |              |              | -6650.142386                |
| Sum of electronic and thermal Enthalpies=         |              |              | -6650.141442                |
| Sum of electronic and thermal Free Energies=      |              |              | -6650.206312                |

**Table S6. Structure 3·HBr**

|                                                                                   |                                                           |              |              |              |
|-----------------------------------------------------------------------------------|-----------------------------------------------------------|--------------|--------------|--------------|
| 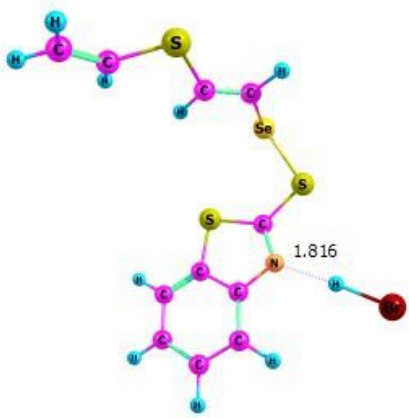 | 6                                                         | 3.431632000  | -0.321964000 | 0.319610000  |
|                                                                                   | 6                                                         | 2.797841000  | -1.482271000 | 0.106335000  |
|                                                                                   | 1                                                         | 3.372539000  | 0.489203000  | -0.398965000 |
|                                                                                   | 1                                                         | 2.816405000  | -2.306251000 | 0.809763000  |
|                                                                                   | 16                                                        | 4.423662000  | -0.005088000 | 1.737364000  |
|                                                                                   | 6                                                         | 4.885466000  | 1.686924000  | 1.464378000  |
|                                                                                   | 34                                                        | 1.893338000  | -1.791400000 | -1.551228000 |
|                                                                                   | 6                                                         | 5.252594000  | 2.503744000  | 2.448287000  |
|                                                                                   | 1                                                         | 5.232858000  | 2.206456000  | 3.490452000  |
|                                                                                   | 1                                                         | 5.595350000  | 3.506474000  | 2.223229000  |
|                                                                                   | 6                                                         | -1.327895000 | 3.595813000  | -1.153006000 |
|                                                                                   | 6                                                         | -1.197265000 | 2.217919000  | -0.985595000 |
|                                                                                   | 6                                                         | -2.165841000 | 1.467050000  | -0.288321000 |
|                                                                                   | 6                                                         | -3.290515000 | 2.103803000  | 0.248168000  |
|                                                                                   | 6                                                         | -3.421917000 | 3.475000000  | 0.077443000  |
|                                                                                   | 6                                                         | -2.451627000 | 4.214579000  | -0.615555000 |
|                                                                                   | 6                                                         | -0.776077000 | -0.198101000 | -0.788380000 |
|                                                                                   | 7                                                         | -1.884216000 | 0.109930000  | -0.195078000 |
|                                                                                   | 1                                                         | -0.581756000 | 4.169926000  | -1.688828000 |
|                                                                                   | 1                                                         | -4.033684000 | 1.525001000  | 0.782598000  |
|                                                                                   | 1                                                         | -4.287712000 | 3.982732000  | 0.485789000  |
|                                                                                   | 1                                                         | -2.577985000 | 5.284104000  | -0.736349000 |
|                                                                                   | 16                                                        | 0.088806000  | 1.155003000  | -1.540042000 |
|                                                                                   | 16                                                        | -0.260615000 | -1.890042000 | -0.878393000 |
|                                                                                   | 35                                                        | -3.917254000 | -1.813022000 | 1.538848000  |
|                                                                                   | 1                                                         | -2.972959000 | -0.992596000 | 0.752757000  |
|                                                                                   | 1                                                         | 4.908803000  | 1.995876000  | 0.424128000  |
|                                                                                   | Temperature 298.150 Kelvin. Pressure 1.00000 Atm.         |              |              |              |
|                                                                                   | Zero-point correction= 0.177186 (Hartree/Particle)        |              |              |              |
|                                                                                   | Thermal correction to Energy= 0.197052                    |              |              |              |
|                                                                                   | Thermal correction to Enthalpy= 0.197996                  |              |              |              |
|                                                                                   | Thermal correction to Gibbs Free Energy= 0.119489         |              |              |              |
|                                                                                   | Sum of electronic and zero-point Energies= -6650.211105   |              |              |              |
|                                                                                   | Sum of electronic and thermal Energies= -6650.191239      |              |              |              |
|                                                                                   | Sum of electronic and thermal Enthalpies= -6650.190295    |              |              |              |
|                                                                                   | Sum of electronic and thermal Free Energies= -6650.268802 |              |              |              |

**Table S7. Structure TS3 [(1<sup>+</sup>-2<sup>-</sup>)·HBr → 4·HBr]**

|                                                                                     |    |              |              |              |
|-------------------------------------------------------------------------------------|----|--------------|--------------|--------------|
|  | 6  | 2.929394000  | 0.100919000  | 1.495557000  |
|                                                                                     | 6  | 3.526850000  | -0.287326000 | 0.364362000  |
|                                                                                     | 1  | 3.390638000  | 0.836684000  | 2.143049000  |
|                                                                                     | 1  | 4.473766000  | 0.164436000  | 0.090563000  |
|                                                                                     | 16 | 1.280251000  | -0.257090000 | 2.026391000  |
|                                                                                     | 6  | 0.735961000  | -1.462328000 | 0.983813000  |
|                                                                                     | 34 | 2.893961000  | -1.537955000 | -0.913914000 |
|                                                                                     | 6  | 1.626901000  | -2.437904000 | 0.296760000  |
|                                                                                     | 1  | 1.042884000  | -3.113462000 | -0.324698000 |
|                                                                                     | 1  | 2.209416000  | -3.009550000 | 1.024538000  |
|                                                                                     | 1  | -0.327923000 | -1.664000000 | 1.088116000  |
|                                                                                     | 6  | -5.025007000 | 0.639076000  | -0.692173000 |
|                                                                                     | 6  | -3.688481000 | 0.249907000  | -0.610946000 |
|                                                                                     | 6  | -3.247928000 | -0.682259000 | 0.356789000  |
|                                                                                     | 6  | -4.173267000 | -1.226504000 | 1.256499000  |
|                                                                                     | 6  | -5.504056000 | -0.838732000 | 1.176255000  |
|                                                                                     | 6  | -5.927963000 | 0.086776000  | 0.210794000  |
|                                                                                     | 6  | -1.279381000 | -0.328652000 | -0.618558000 |
|                                                                                     | 7  | -1.896166000 | -0.983369000 | 0.322169000  |
|                                                                                     | 1  | -5.354538000 | 1.354525000  | -1.436041000 |

|                                                   |    |              |              |                             |
|---------------------------------------------------|----|--------------|--------------|-----------------------------|
|                                                   | 1  | -3.837662000 | -1.941278000 | 1.998579000                 |
|                                                   | 1  | -6.226462000 | -1.255881000 | 1.868486000                 |
|                                                   | 1  | -6.971194000 | 0.377418000  | 0.166248000                 |
|                                                   | 16 | -2.319563000 | 0.759255000  | -1.580352000                |
|                                                   | 16 | 0.430208000  | -0.473202000 | -0.977846000                |
|                                                   | 35 | 1.578518000  | 2.927548000  | 0.165380000                 |
|                                                   | 1  | 1.138950000  | 1.619747000  | -0.395208000                |
| Temperature 298.150 Kelvin. Pressure 1.00000 Atm. |    |              |              |                             |
| Zero-point correction=                            |    |              |              | 0.179857 (Hartree/Particle) |
| Thermal correction to Energy=                     |    |              |              | 0.196140                    |
| Thermal correction to Enthalpy=                   |    |              |              | 0.197084                    |
| Thermal correction to Gibbs Free Energy=          |    |              |              | 0.132165                    |
| Sum of electronic and zero-point Energies=        |    |              |              | -6650.150243                |
| Sum of electronic and thermal Energies=           |    |              |              | -6650.133960                |
| Sum of electronic and thermal Enthalpies=         |    |              |              | -6650.133016                |
| Sum of electronic and thermal Free Energies=      |    |              |              | -6650.197935                |

**Table S8. Structure 4·HBr**

|                                                                                   |    |              |              |                             |
|-----------------------------------------------------------------------------------|----|--------------|--------------|-----------------------------|
| 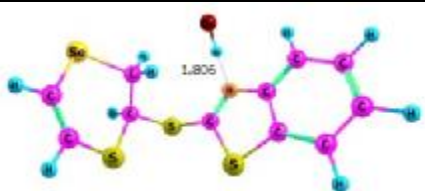 | 6  | 3.338194000  | -2.177541000 | -0.605703000                |
|                                                                                   | 6  | 3.848065000  | -1.162666000 | -1.303797000                |
|                                                                                   | 1  | 3.602486000  | -3.197778000 | -0.867549000                |
|                                                                                   | 1  | 4.535550000  | -1.359489000 | -2.117466000                |
|                                                                                   | 16 | 2.234316000  | -2.187288000 | 0.778174000                 |
|                                                                                   | 6  | 1.842061000  | -0.411998000 | 1.092438000                 |
|                                                                                   | 34 | 3.455654000  | 0.690720000  | -1.066637000                |
|                                                                                   | 6  | 1.717597000  | 0.442336000  | -0.158033000                |
|                                                                                   | 1  | 1.019583000  | 0.013054000  | -0.873632000                |
|                                                                                   | 1  | 1.390087000  | 1.449166000  | 0.101014000                 |
|                                                                                   | 6  | -3.844233000 | -2.452606000 | -0.833359000                |
|                                                                                   | 6  | -2.838563000 | -1.756075000 | -0.159190000                |
|                                                                                   | 6  | -2.711752000 | -0.353699000 | -0.279422000                |
|                                                                                   | 6  | -3.605869000 | 0.365195000  | -1.086171000                |
|                                                                                   | 6  | -4.600679000 | -0.329308000 | -1.751980000                |
|                                                                                   | 6  | -4.719087000 | -1.724799000 | -1.626276000                |
|                                                                                   | 6  | -0.996984000 | -0.707606000 | 1.095232000                 |
|                                                                                   | 7  | -1.669688000 | 0.194294000  | 0.446406000                 |
|                                                                                   | 1  | -3.940296000 | -3.527295000 | -0.740989000                |
|                                                                                   | 1  | -3.504060000 | 1.439651000  | -1.174802000                |
|                                                                                   | 1  | -5.300259000 | 0.209005000  | -2.380093000                |
|                                                                                   | 1  | -5.508360000 | -2.242666000 | -2.158497000                |
|                                                                                   | 16 | -1.586698000 | -2.357713000 | 0.900895000                 |
|                                                                                   | 16 | 0.343114000  | -0.337532000 | 2.198808000                 |
|                                                                                   | 35 | -1.136085000 | 3.432342000  | 0.365290000                 |
|                                                                                   | 1  | -1.363110000 | 1.973847000  | 0.463896000                 |
|                                                                                   | 1  | 2.602697000  | -0.000846000 | 1.755321000                 |
| Temperature 298.150 Kelvin. Pressure 1.00000 Atm.                                 |    |              |              |                             |
| Zero-point correction=                                                            |    |              |              | 0.181038 (Hartree/Particle) |
| Thermal correction to Energy=                                                     |    |              |              | 0.198876                    |
| Thermal correction to Enthalpy=                                                   |    |              |              | 0.199820                    |
| Thermal correction to Gibbs Free Energy=                                          |    |              |              | 0.128436                    |
| Sum of electronic and zero-point Energies=                                        |    |              |              | -6650.205469                |
| Sum of electronic and thermal Energies=                                           |    |              |              | -6650.187631                |
| Sum of electronic and thermal Enthalpies=                                         |    |              |              | -6650.186687                |
| Sum of electronic and thermal Free Energies=                                      |    |              |              | -6650.258071                |

**Table S9. Structure 3·H<sup>+</sup>(N)**

|  |                                                           |              |              |              |
|--|-----------------------------------------------------------|--------------|--------------|--------------|
|  | 6                                                         | -5.113585000 | 1.337731000  | -0.464070000 |
|  | 6                                                         | -3.915192000 | 0.792335000  | -0.008564000 |
|  | 6                                                         | -3.802054000 | -0.577427000 | 0.252102000  |
|  | 6                                                         | -4.876099000 | -1.446352000 | 0.069864000  |
|  | 6                                                         | -6.069354000 | -0.899306000 | -0.383754000 |
|  | 6                                                         | -6.187050000 | 0.473441000  | -0.647514000 |
|  | 6                                                         | -1.651255000 | 0.120437000  | 0.787917000  |
|  | 7                                                         | -2.514443000 | -0.898098000 | 0.695062000  |
|  | 1                                                         | -5.208172000 | 2.396442000  | -0.669700000 |
|  | 1                                                         | -4.784506000 | -2.506657000 | 0.272694000  |
|  | 1                                                         | -6.923985000 | -1.546396000 | -0.536709000 |
|  | 1                                                         | -7.130830000 | 0.869287000  | -1.001400000 |
|  | 16                                                        | -2.384811000 | 1.617622000  | 0.314822000  |
|  | 16                                                        | -0.020191000 | -0.125222000 | 1.311522000  |
|  | 34                                                        | 1.076990000  | -0.774281000 | -0.648783000 |
|  | 6                                                         | 2.575748000  | 0.361013000  | -0.700255000 |
|  | 1                                                         | 2.460610000  | 1.324124000  | -1.182432000 |
|  | 6                                                         | 3.764610000  | -0.076549000 | -0.221445000 |
|  | 1                                                         | 3.839107000  | -1.045953000 | 0.262222000  |
|  | 16                                                        | 5.236416000  | 0.825710000  | -0.352574000 |
|  | 6                                                         | 6.420913000  | -0.295175000 | 0.364418000  |
|  | 1                                                         | 6.031389000  | -1.268477000 | 0.642094000  |
|  | 6                                                         | 7.707487000  | 0.020607000  | 0.464649000  |
|  | 1                                                         | 8.097971000  | 0.989055000  | 0.173864000  |
|  | 1                                                         | 8.415546000  | -0.707593000 | 0.841468000  |
|  | 1                                                         | -2.241320000 | -1.845898000 | 0.930704000  |
|  | Temperature 298.150 Kelvin. Pressure 1.00000 Atm.         |              |              |              |
|  | Zero-point correction= 0.182219 (Hartree/Particle)        |              |              |              |
|  | Thermal correction to Energy= 0.197713                    |              |              |              |
|  | Thermal correction to Enthalpy= 0.198657                  |              |              |              |
|  | Thermal correction to Gibbs Free Energy= 0.134818         |              |              |              |
|  | Sum of electronic and zero-point Energies= -4075.813080   |              |              |              |
|  | Sum of electronic and thermal Energies= -4075.797585      |              |              |              |
|  | Sum of electronic and thermal Enthalpies= -4075.796641    |              |              |              |
|  | Sum of electronic and thermal Free Energies= -4075.860481 |              |              |              |

**Table S10. Structure 3·H<sup>+</sup>(S)**

|                                                                                   |    |              |              |              |
|-----------------------------------------------------------------------------------|----|--------------|--------------|--------------|
| 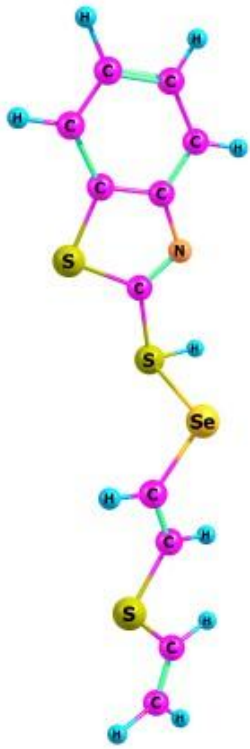 | 6  | -5.177292000 | -1.375896000 | 0.553213000  |
|                                                                                   | 6  | -3.985258000 | -0.840582000 | 0.067160000  |
|                                                                                   | 6  | -3.884347000 | 0.521429000  | -0.318509000 |
|                                                                                   | 6  | -5.004280000 | 1.361878000  | -0.214478000 |
|                                                                                   | 6  | -6.185047000 | 0.829250000  | 0.268961000  |
|                                                                                   | 6  | -6.270059000 | -0.524213000 | 0.648655000  |
|                                                                                   | 6  | -1.828608000 | -0.094677000 | -0.763061000 |
|                                                                                   | 7  | -2.641877000 | 0.908025000  | -0.773678000 |
|                                                                                   | 1  | -5.254870000 | -2.415108000 | 0.846224000  |
|                                                                                   | 1  | -4.922791000 | 2.399970000  | -0.510874000 |
|                                                                                   | 1  | -7.061135000 | 1.459673000  | 0.358361000  |
|                                                                                   | 1  | -7.209552000 | -0.912320000 | 1.023470000  |
|                                                                                   | 16 | -2.445418000 | -1.640188000 | -0.187483000 |
|                                                                                   | 16 | -0.147805000 | 0.057065000  | -1.299563000 |
|                                                                                   | 34 | 1.220220000  | 0.980992000  | 0.689578000  |
|                                                                                   | 6  | 2.647817000  | -0.180758000 | 0.798927000  |
|                                                                                   | 1  | 2.532582000  | -1.079684000 | 1.394343000  |
|                                                                                   | 6  | 3.845574000  | 0.130522000  | 0.207409000  |
|                                                                                   | 1  | 3.940237000  | 1.033616000  | -0.388603000 |
|                                                                                   | 16 | 5.245030000  | -0.833246000 | 0.387445000  |
|                                                                                   | 6  | 6.478891000  | 0.078089000  | -0.506675000 |
|                                                                                   | 1  | 6.140939000  | 0.995925000  | -0.974349000 |
|                                                                                   | 6  | 7.732616000  | -0.358828000 | -0.582242000 |
|                                                                                   | 1  | 8.067873000  | -1.275387000 | -0.110375000 |
|                                                                                   | 1  | 8.469179000  | 0.211648000  | -1.134651000 |
|                                                                                   | 1  | -0.345760000 | 1.256374000  | -1.895985000 |
| Temperature 298.150 Kelvin. Pressure 1.00000 Atm.                                 |    |              |              |              |
| Zero-point correction= 0.178645 (Hartree/Particle)                                |    |              |              |              |
| Thermal correction to Energy= 0.196176                                            |    |              |              |              |
| Thermal correction to Enthalpy= 0.197121                                          |    |              |              |              |
| Thermal correction to Gibbs Free Energy= 0.126667                                 |    |              |              |              |
| Sum of electronic and zero-point Energies= -4075.776559                           |    |              |              |              |
| Sum of electronic and thermal Energies= -4075.759028                              |    |              |              |              |
| Sum of electronic and thermal Enthalpies= -4075.758084                            |    |              |              |              |
| Sum of electronic and thermal Free Energies= -4075.828537                         |    |              |              |              |

**Table S11. Structure TS [3·H<sup>+</sup>(N) → 3·H<sup>+</sup>(S)]**

|                                                                                                                                                                                                                                                                                                                                                                                                                                                                                                                                                                                                     |    |              |              |              |
|-----------------------------------------------------------------------------------------------------------------------------------------------------------------------------------------------------------------------------------------------------------------------------------------------------------------------------------------------------------------------------------------------------------------------------------------------------------------------------------------------------------------------------------------------------------------------------------------------------|----|--------------|--------------|--------------|
| 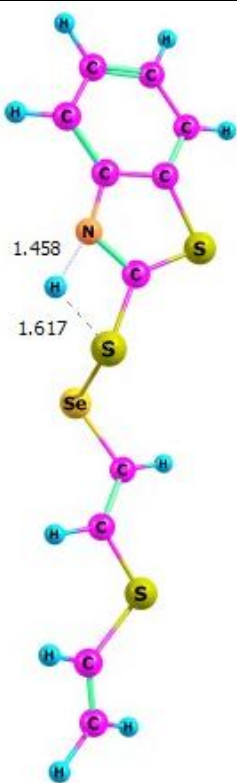                                                                                                                                                                                                                                                                                                                                                                                                                                                                                                                   | 6  | 5.246272000  | 1.312375000  | 0.296076000  |
|                                                                                                                                                                                                                                                                                                                                                                                                                                                                                                                                                                                                     | 6  | 3.994286000  | 0.798376000  | -0.037199000 |
|                                                                                                                                                                                                                                                                                                                                                                                                                                                                                                                                                                                                     | 6  | 3.815190000  | -0.579030000 | -0.314894000 |
|                                                                                                                                                                                                                                                                                                                                                                                                                                                                                                                                                                                                     | 6  | 4.901185000  | -1.461047000 | -0.264563000 |
|                                                                                                                                                                                                                                                                                                                                                                                                                                                                                                                                                                                                     | 6  | 6.142823000  | -0.944408000 | 0.063489000  |
|                                                                                                                                                                                                                                                                                                                                                                                                                                                                                                                                                                                                     | 6  | 6.313236000  | 0.424111000  | 0.340662000  |
|                                                                                                                                                                                                                                                                                                                                                                                                                                                                                                                                                                                                     | 6  | 1.712853000  | 0.167823000  | -0.579020000 |
|                                                                                                                                                                                                                                                                                                                                                                                                                                                                                                                                                                                                     | 7  | 2.498165000  | -0.887341000 | -0.606122000 |
|                                                                                                                                                                                                                                                                                                                                                                                                                                                                                                                                                                                                     | 1  | 5.387381000  | 2.364165000  | 0.510517000  |
|                                                                                                                                                                                                                                                                                                                                                                                                                                                                                                                                                                                                     | 1  | 4.759118000  | -2.512876000 | -0.478166000 |
|                                                                                                                                                                                                                                                                                                                                                                                                                                                                                                                                                                                                     | 1  | 7.000211000  | -1.604397000 | 0.108921000  |
|                                                                                                                                                                                                                                                                                                                                                                                                                                                                                                                                                                                                     | 1  | 7.298356000  | 0.796171000  | 0.594340000  |
|                                                                                                                                                                                                                                                                                                                                                                                                                                                                                                                                                                                                     | 16 | 2.459538000  | 1.665974000  | -0.182129000 |
|                                                                                                                                                                                                                                                                                                                                                                                                                                                                                                                                                                                                     | 16 | 0.116887000  | -0.404477000 | -1.089758000 |
|                                                                                                                                                                                                                                                                                                                                                                                                                                                                                                                                                                                                     | 34 | -1.196380000 | -0.687944000 | 0.935997000  |
|                                                                                                                                                                                                                                                                                                                                                                                                                                                                                                                                                                                                     | 6  | -2.643037000 | 0.447206000  | 0.630740000  |
|                                                                                                                                                                                                                                                                                                                                                                                                                                                                                                                                                                                                     | 1  | -2.534375000 | 1.487729000  | 0.912639000  |
|                                                                                                                                                                                                                                                                                                                                                                                                                                                                                                                                                                                                     | 6  | -3.816572000 | -0.054799000 | 0.158308000  |
|                                                                                                                                                                                                                                                                                                                                                                                                                                                                                                                                                                                                     | 1  | -3.893770000 | -1.103216000 | -0.114256000 |
|                                                                                                                                                                                                                                                                                                                                                                                                                                                                                                                                                                                                     | 16 | -5.241672000 | 0.894117000  | -0.024135000 |
| <p>Temperature 298.150 Kelvin. Pressure 1.00000 Atm.<br/>           Zero-point correction= 0.175959 (Hartree/Particle)<br/>           Thermal correction to Energy= 0.192972<br/>           Thermal correction to Enthalpy= 0.193916<br/>           Thermal correction to Gibbs Free Energy= 0.125365<br/>           Sum of electronic and zero-point Energies= -4075.749163<br/>           Sum of electronic and thermal Energies= -4075.732149<br/>           Sum of electronic and thermal Enthalpies= -4075.731205<br/>           Sum of electronic and thermal Free Energies= -4075.799757</p> | 6  | -6.419092000 | -0.297642000 | -0.623482000 |
|                                                                                                                                                                                                                                                                                                                                                                                                                                                                                                                                                                                                     | 1  | -5.995694000 | -1.175306000 | -1.099237000 |
|                                                                                                                                                                                                                                                                                                                                                                                                                                                                                                                                                                                                     | 6  | -7.727398000 | -0.079968000 | -0.540913000 |
|                                                                                                                                                                                                                                                                                                                                                                                                                                                                                                                                                                                                     | 1  | -8.148409000 | 0.801122000  | -0.070403000 |
|                                                                                                                                                                                                                                                                                                                                                                                                                                                                                                                                                                                                     | 1  | -8.421786000 | -0.798325000 | -0.959465000 |
|                                                                                                                                                                                                                                                                                                                                                                                                                                                                                                                                                                                                     | 1  | 1.264220000  | -1.541366000 | -1.024818000 |

Table S12. Structure TS5

|                                                                                   |    |              |              |              |
|-----------------------------------------------------------------------------------|----|--------------|--------------|--------------|
| 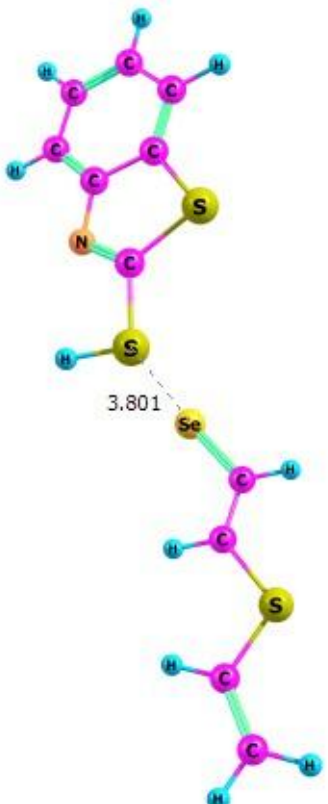 | 6  | 5.405324000  | -0.344150000 | -1.313267000 |
|                                                                                   | 6  | 4.212254000  | -0.510758000 | -0.613462000 |
|                                                                                   | 6  | 4.053571000  | -0.025499000 | 0.712623000  |
|                                                                                   | 6  | 5.117858000  | 0.639922000  | 1.343676000  |
|                                                                                   | 6  | 6.300100000  | 0.805113000  | 0.646741000  |
|                                                                                   | 6  | 6.442485000  | 0.318424000  | -0.667990000 |
|                                                                                   | 6  | 2.056546000  | -0.901932000 | 0.454447000  |
|                                                                                   | 7  | 2.820283000  | -0.258733000 | 1.277420000  |
|                                                                                   | 1  | 5.526851000  | -0.715384000 | -2.322896000 |
|                                                                                   | 1  | 4.992750000  | 1.006217000  | 2.354772000  |
|                                                                                   | 1  | 7.133021000  | 1.314981000  | 1.115057000  |
|                                                                                   | 1  | 7.381634000  | 0.462162000  | -1.188664000 |
|                                                                                   | 16 | 2.734614000  | -1.299509000 | -1.128688000 |
|                                                                                   | 16 | 0.412314000  | -1.384190000 | 0.852736000  |
|                                                                                   | 34 | -1.601671000 | 1.703293000  | -0.072037000 |
|                                                                                   | 6  | -2.999945000 | 0.812699000  | -0.821212000 |
|                                                                                   | 1  | -3.032488000 | 0.689218000  | -1.899795000 |
|                                                                                   | 6  | -4.043116000 | 0.339236000  | -0.039740000 |
|                                                                                   | 1  | -4.003895000 | 0.449975000  | 1.040135000  |
|                                                                                   | 16 | -5.417272000 | -0.391012000 | -0.713813000 |
|                                                                                   | 6  | -6.437008000 | -0.748085000 | 0.688030000  |
|                                                                                   | 1  | -6.024564000 | -0.487607000 | 1.656054000  |
|                                                                                   | 6  | -7.635167000 | -1.306403000 | 0.526058000  |
|                                                                                   | 1  | -8.041006000 | -1.561701000 | -0.446323000 |
|                                                                                   | 1  | -8.249250000 | -1.523506000 | 1.391626000  |
|                                                                                   | 1  | 0.519893000  | -1.011224000 | 2.148147000  |
| Temperature 298.150 Kelvin. Pressure 1.00000 Atm.                                 |    |              |              |              |
| Zero-point correction= 0.177372 (Hartree/Particle)                                |    |              |              |              |
| Thermal correction to Energy= 0.194684                                            |    |              |              |              |
| Thermal correction to Enthalpy= 0.195628                                          |    |              |              |              |
| Thermal correction to Gibbs Free Energy= 0.122988                                 |    |              |              |              |
| Sum of electronic and zero-point Energies= -4075.761363                           |    |              |              |              |
| Sum of electronic and thermal Energies= -4075.744051                              |    |              |              |              |
| Sum of electronic and thermal Enthalpies= -4075.743107                            |    |              |              |              |
| Sum of electronic and thermal Free Energies= -4075.815747                         |    |              |              |              |



**Table S13. Structure A<sup>+</sup>-2**

|                                                                                   |    |              |              |                             |
|-----------------------------------------------------------------------------------|----|--------------|--------------|-----------------------------|
| 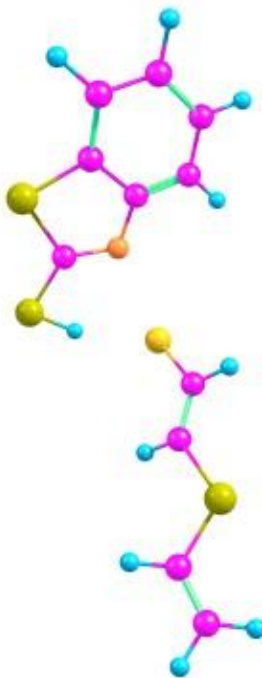 | 6  | -4.155583000 | -0.565903000 | -1.371384000                |
|                                                                                   | 6  | -3.063952000 | 0.103779000  | -0.823078000                |
|                                                                                   | 6  | -2.156217000 | -0.542731000 | 0.026650000                 |
|                                                                                   | 6  | -2.329427000 | -1.888008000 | 0.353959000                 |
|                                                                                   | 6  | -3.417333000 | -2.556404000 | -0.191418000                |
|                                                                                   | 6  | -4.319340000 | -1.906429000 | -1.045774000                |
|                                                                                   | 6  | -1.238005000 | 1.563543000  | 0.000349000                 |
|                                                                                   | 7  | -1.127739000 | 0.318837000  | 0.462149000                 |
|                                                                                   | 1  | -4.853918000 | -0.059871000 | -2.025990000                |
|                                                                                   | 1  | -1.641515000 | -2.388724000 | 1.022448000                 |
|                                                                                   | 1  | -3.572308000 | -3.600045000 | 0.052556000                 |
|                                                                                   | 1  | -5.159117000 | -2.453825000 | -1.455422000                |
|                                                                                   | 16 | -2.611637000 | 1.791510000  | -1.033157000                |
|                                                                                   | 16 | -0.195520000 | 2.915210000  | 0.328765000                 |
|                                                                                   | 34 | 0.353576000  | -0.316818000 | 1.649471000                 |
|                                                                                   | 6  | 1.534657000  | -1.051108000 | 0.384385000                 |
|                                                                                   | 1  | 1.311889000  | -2.051242000 | 0.032876000                 |
|                                                                                   | 6  | 2.675826000  | -0.401882000 | 0.050173000                 |
|                                                                                   | 1  | 2.882457000  | 0.593462000  | 0.431158000                 |
|                                                                                   | 16 | 3.896879000  | -1.092294000 | -0.964660000                |
|                                                                                   | 6  | 5.107296000  | 0.216334000  | -1.029347000                |
|                                                                                   | 1  | 4.707215000  | 1.222377000  | -1.092568000                |
|                                                                                   | 6  | 6.406690000  | -0.049159000 | -1.103806000                |
|                                                                                   | 1  | 6.800845000  | -1.057817000 | -1.057361000                |
|                                                                                   | 1  | 7.119320000  | 0.758072000  | -1.225538000                |
|                                                                                   | 1  | 0.574459000  | 2.214551000  | 1.201342000                 |
| Temperature 298.150 Kelvin. Pressure 1.00000 Atm.                                 |    |              |              |                             |
| Zero-point correction=                                                            |    |              |              | 0.179043 (Hartree/Particle) |
| Thermal correction to Energy=                                                     |    |              |              | 0.196183                    |
| Thermal correction to Enthalpy=                                                   |    |              |              | 0.197127                    |
| Thermal correction to Gibbs Free Energy=                                          |    |              |              | 0.130473                    |
| Sum of electronic and zero-point Energies=                                        |    |              |              | -4075.791650                |
| Sum of electronic and thermal Energies=                                           |    |              |              | -4075.774510                |
| Sum of electronic and thermal Enthalpies=                                         |    |              |              | -4075.773566                |
| Sum of electronic and thermal Free Energies=                                      |    |              |              | -4075.840220                |

**Table S14. Structure B<sup>+</sup>-2**

|                                                                                     |    |              |              |              |
|-------------------------------------------------------------------------------------|----|--------------|--------------|--------------|
| 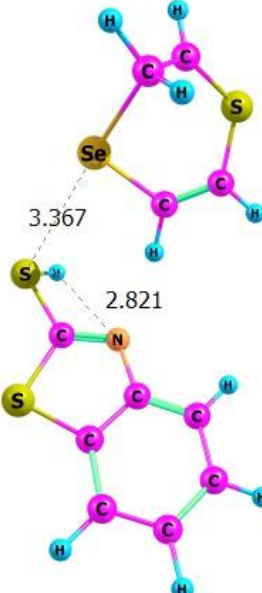 | 6  | 4.817824000  | -0.474316000 | -0.813290000 |
|                                                                                     | 6  | 3.637959000  | 0.069428000  | -0.303967000 |
|                                                                                     | 6  | 2.668642000  | -0.734428000 | 0.337624000  |
|                                                                                     | 6  | 2.891413000  | -2.110631000 | 0.478036000  |
|                                                                                     | 6  | 4.063958000  | -2.650638000 | -0.025615000 |
|                                                                                     | 6  | 5.016839000  | -1.840870000 | -0.666899000 |
|                                                                                     | 6  | 1.641394000  | 1.212506000  | 0.521881000  |
|                                                                                     | 7  | 1.539735000  | -0.052616000 | 0.774018000  |
|                                                                                     | 1  | 5.558955000  | 0.145562000  | -1.302054000 |
|                                                                                     | 1  | 2.157324000  | -2.726949000 | 0.982639000  |
|                                                                                     | 1  | 4.253584000  | -3.712124000 | 0.078361000  |
|                                                                                     | 1  | 5.926296000  | -2.288005000 | -1.049729000 |
|                                                                                     | 16 | 3.105875000  | 1.740252000  | -0.295019000 |
|                                                                                     | 16 | 0.382731000  | 2.411322000  | 0.916549000  |
|                                                                                     | 34 | -2.351157000 | 0.942508000  | -0.388076000 |
|                                                                                     | 6  | -1.619836000 | -0.641722000 | 0.317860000  |
|                                                                                     | 1  | -0.566562000 | -0.570900000 | 0.602108000  |
|                                                                                     | 6  | -2.304757000 | -1.788329000 | 0.519012000  |
|                                                                                     | 1  | -1.824564000 | -2.680731000 | 0.901897000  |
|                                                                                     | 16 | -4.051834000 | -1.867137000 | 0.577750000  |
|                                                                                     | 6  | -4.541593000 | -0.636047000 | -0.437733000 |



|                                                   |   |              |              |                             |
|---------------------------------------------------|---|--------------|--------------|-----------------------------|
|                                                   | 1 | -5.563349000 | -0.301802000 | -0.282469000                |
|                                                   | 6 | -3.704103000 | -0.062078000 | -1.484795000                |
|                                                   | 1 | -3.148992000 | -0.793570000 | -2.071599000                |
|                                                   | 1 | -4.230430000 | 0.652616000  | -2.111692000                |
|                                                   | 1 | 0.204126000  | 1.990686000  | 2.187822000                 |
| Temperature 298.150 Kelvin. Pressure 1.00000 Atm. |   |              |              |                             |
| Zero-point correction=                            |   |              |              | 0.180130 (Hartree/Particle) |
| Thermal correction to Energy=                     |   |              |              | 0.196542                    |
| Thermal correction to Enthalpy=                   |   |              |              | 0.197486                    |
| Thermal correction to Gibbs Free Energy=          |   |              |              | 0.131574                    |
| Sum of electronic and zero-point Energies=        |   |              |              | -4075.786028                |
| Sum of electronic and thermal Energies=           |   |              |              | -4075.769616                |
| Sum of electronic and thermal Enthalpies=         |   |              |              | -4075.768672                |
| Sum of electronic and thermal Free Energies=      |   |              |              | -4075.834584                |

**Table S15. Structure TS7**

|                                                                                    |                                                   |              |              |              |                             |
|------------------------------------------------------------------------------------|---------------------------------------------------|--------------|--------------|--------------|-----------------------------|
| 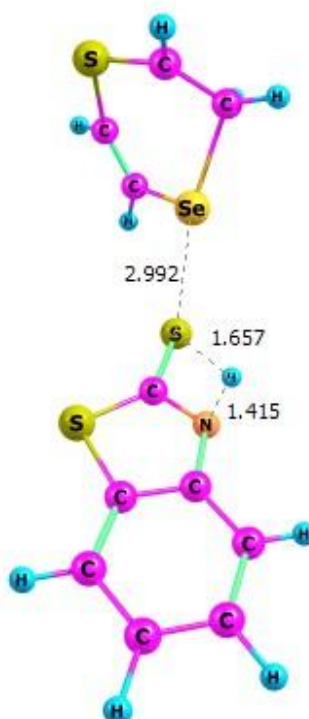 | 6                                                 | 4.703604000  | 1.337182000  | -0.890611000 |                             |
|                                                                                    | 6                                                 | 3.607780000  | 0.806784000  | -0.213926000 |                             |
|                                                                                    | 6                                                 | 3.494764000  | -0.581807000 | 0.028937000  |                             |
|                                                                                    | 6                                                 | 4.493116000  | -1.457812000 | -0.408064000 |                             |
|                                                                                    | 6                                                 | 5.583288000  | -0.925720000 | -1.079669000 |                             |
|                                                                                    | 6                                                 | 5.688223000  | 0.454073000  | -1.319210000 |                             |
|                                                                                    | 6                                                 | 1.585407000  | 0.147366000  | 0.994737000  |                             |
|                                                                                    | 7                                                 | 2.328810000  | -0.903148000 | 0.707921000  |                             |
|                                                                                    | 1                                                 | 4.791792000  | 2.400543000  | -1.075227000 |                             |
|                                                                                    | 1                                                 | 4.406470000  | -2.520170000 | -0.217447000 |                             |
|                                                                                    | 1                                                 | 6.369958000  | -1.585366000 | -1.424850000 |                             |
|                                                                                    | 1                                                 | 6.552651000  | 0.840389000  | -1.845190000 |                             |
|                                                                                    | 16                                                | 2.210186000  | 1.665698000  | 0.457139000  |                             |
|                                                                                    | 16                                                | 0.212600000  | -0.422225000 | 1.915919000  |                             |
|                                                                                    | 34                                                | -2.001987000 | -0.741903000 | -0.069758000 |                             |
|                                                                                    | 6                                                 | -2.990385000 | 0.413917000  | 1.061015000  |                             |
|                                                                                    | 1                                                 | -2.534574000 | 0.595707000  | 2.026059000  |                             |
|                                                                                    | 6                                                 | -4.146818000 | 1.023656000  | 0.737297000  |                             |
|                                                                                    | 1                                                 | -4.676067000 | 1.648853000  | 1.446348000  |                             |
|                                                                                    | 16                                                | -4.753885000 | 1.157853000  | -0.902282000 |                             |
|  | 6                                                 | -4.134408000 | -0.225754000 | -1.642687000 |                             |
|                                                                                    | 1                                                 | -4.052685000 | -0.155379000 | -2.723269000 |                             |
|                                                                                    | 6                                                 | -3.754485000 | -1.420969000 | -0.941824000 |                             |
|                                                                                    | 1                                                 | -4.381741000 | -1.701394000 | -0.098850000 |                             |
|                                                                                    | 1                                                 | -3.498749000 | -2.256820000 | -1.585820000 |                             |
|                                                                                    | 1                                                 | 1.305892000  | -1.566324000 | 1.426159000  |                             |
|                                                                                    | Temperature 298.150 Kelvin. Pressure 1.00000 Atm. |              |              |              |                             |
|                                                                                    | Zero-point correction=                            |              |              |              | 0.177249 (Hartree/Particle) |
|                                                                                    | Thermal correction to Energy=                     |              |              |              | 0.193240                    |
|                                                                                    | Thermal correction to Enthalpy=                   |              |              |              | 0.194184                    |
|                                                                                    | Thermal correction to Gibbs Free Energy=          |              |              |              | 0.128640                    |
|                                                                                    | Sum of electronic and zero-point Energies=        |              |              |              | -4075.744918                |
|                                                                                    | Sum of electronic and thermal Energies=           |              |              |              | -4075.728927                |
|                                                                                    | Sum of electronic and thermal Enthalpies=         |              |              |              | -4075.727983                |
|                                                                                    | Sum of electronic and thermal Free Energies=      |              |              |              | -4075.793527                |

**Table S16. Structure 4·H<sup>+</sup>**

|                                                                                   |                                                           |              |              |              |
|-----------------------------------------------------------------------------------|-----------------------------------------------------------|--------------|--------------|--------------|
| 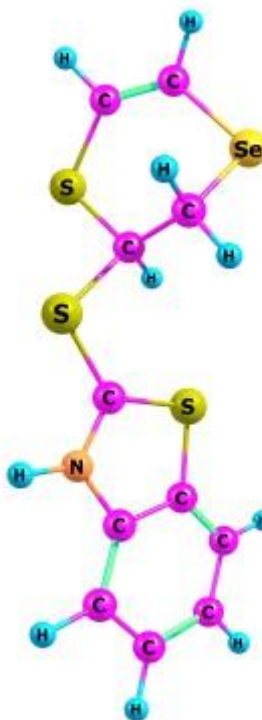 | 6                                                         | -4.267157000 | -1.651111000 | -0.637136000 |
|                                                                                   | 6                                                         | -3.323638000 | -0.685987000 | -0.294059000 |
|                                                                                   | 6                                                         | -3.708573000 | 0.539404000  | 0.260472000  |
|                                                                                   | 6                                                         | -5.048982000 | 0.842092000  | 0.491947000  |
|                                                                                   | 6                                                         | -5.989314000 | -0.121019000 | 0.149804000  |
|                                                                                   | 6                                                         | -5.604856000 | -1.350018000 | -0.406629000 |
|                                                                                   | 6                                                         | -1.403719000 | 0.833284000  | 0.205928000  |
|                                                                                   | 7                                                         | -2.597528000 | 1.348569000  | 0.522853000  |
|                                                                                   | 1                                                         | -3.974131000 | -2.600294000 | -1.067268000 |
|                                                                                   | 1                                                         | -5.346532000 | 1.791506000  | 0.920633000  |
|                                                                                   | 1                                                         | -7.039668000 | 0.082775000  | 0.316115000  |
|                                                                                   | 1                                                         | -6.362575000 | -2.079972000 | -0.662715000 |
|                                                                                   | 16                                                        | -1.565418000 | -0.759796000 | -0.457667000 |
|                                                                                   | 16                                                        | 0.051720000  | 1.736791000  | 0.439161000  |
|                                                                                   | 34                                                        | 3.345776000  | -1.519455000 | 0.259075000  |
|                                                                                   | 6                                                         | 4.580488000  | -0.101026000 | -0.063829000 |
|                                                                                   | 1                                                         | 5.618401000  | -0.342191000 | 0.130493000  |
|                                                                                   | 6                                                         | 4.228308000  | 1.131533000  | -0.428047000 |
|                                                                                   | 1                                                         | 4.972920000  | 1.915699000  | -0.523707000 |
|                                                                                   | 16                                                        | 2.639159000  | 1.758607000  | -0.893627000 |
|                                                                                   | 6                                                         | 1.416851000  | 0.572065000  | -0.192355000 |
|                                                                                   | 1                                                         | 0.975211000  | 0.001833000  | -1.008308000 |
|                                                                                   | 6                                                         | 1.921910000  | -0.321605000 | 0.923184000  |
|                                                                                   | 1                                                         | 2.325310000  | 0.255760000  | 1.753761000  |
|                                                                                   | 1                                                         | 1.129973000  | -0.975805000 | 1.288962000  |
|                                                                                   | 1                                                         | -2.687874000 | 2.276882000  | 0.921956000  |
|                                                                                   | Temperature 298.150 Kelvin. Pressure 1.00000 Atm.         |              |              |              |
|                                                                                   | Zero-point correction= 0.185500 (Hartree/Particle)        |              |              |              |
|                                                                                   | Thermal correction to Energy= 0.200878                    |              |              |              |
|                                                                                   | Thermal correction to Enthalpy= 0.201823                  |              |              |              |
|                                                                                   | Thermal correction to Gibbs Free Energy= 0.139262         |              |              |              |
|                                                                                   | Sum of electronic and zero-point Energies= -4075.816181   |              |              |              |
|                                                                                   | Sum of electronic and thermal Energies= -4075.800802      |              |              |              |
|                                                                                   | Sum of electronic and thermal Enthalpies= -4075.799858    |              |              |              |
|                                                                                   | Sum of electronic and thermal Free Energies= -4075.862418 |              |              |              |

**Table S17. Structure 4**

|                                                                                     |    |              |              |              |
|-------------------------------------------------------------------------------------|----|--------------|--------------|--------------|
| 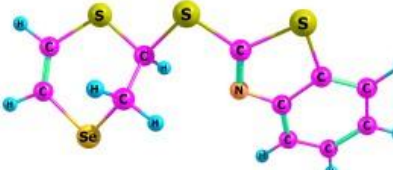 | 6  | 5.073492000  | -0.036724000 | -0.064657000 |
|                                                                                     | 6  | 3.711369000  | -0.327754000 | -0.084099000 |
|                                                                                     | 6  | 2.740478000  | 0.653613000  | 0.211486000  |
|                                                                                     | 6  | 3.149582000  | 1.951594000  | 0.535124000  |
|                                                                                     | 6  | 4.506148000  | 2.243359000  | 0.556398000  |
|                                                                                     | 6  | 5.459739000  | 1.259327000  | 0.259374000  |
|                                                                                     | 6  | 1.356230000  | -1.025044000 | -0.172555000 |
|                                                                                     | 7  | 1.422891000  | 0.222137000  | 0.145488000  |
|                                                                                     | 1  | 5.813018000  | -0.794588000 | -0.292491000 |
|                                                                                     | 1  | 2.402138000  | 2.701529000  | 0.762860000  |
|                                                                                     | 1  | 4.834239000  | 3.245522000  | 0.806198000  |
|                                                                                     | 1  | 6.513976000  | 1.509245000  | 0.282501000  |
|                                                                                     | 16 | 2.910431000  | -1.850862000 | -0.443843000 |
|                                                                                     | 16 | -0.129153000 | -1.961829000 | -0.354875000 |
|                                                                                     | 6  | -1.366123000 | -0.695896000 | 0.216219000  |
|                                                                                     | 6  | -1.739548000 | 0.252514000  | -0.908928000 |
|                                                                                     | 6  | -4.221032000 | -0.787592000 | 0.575340000  |
|                                                                                     | 6  | -4.383675000 | 0.478597000  | 0.189388000  |
|                                                                                     | 1  | -2.202008000 | -0.270176000 | -1.744436000 |
|                                                                                     | 1  | -5.090317000 | -1.404718000 | 0.782244000  |
|                                                                                     | 1  | -5.380396000 | 0.891318000  | 0.092437000  |

|                                                   |    |              |              |                             |
|---------------------------------------------------|----|--------------|--------------|-----------------------------|
|                                                   | 34 | -2.979006000 | 1.670686000  | -0.308285000                |
|                                                   | 16 | -2.752742000 | -1.728083000 | 0.867909000                 |
|                                                   | 1  | -0.846000000 | 0.776691000  | -1.244590000                |
|                                                   | 1  | -0.895210000 | -0.156671000 | 1.032963000                 |
| Temperature 298.150 Kelvin. Pressure 1.00000 Atm. |    |              |              |                             |
| Zero-point correction=                            |    |              |              | 0.173233 (Hartree/Particle) |
| Thermal correction to Energy=                     |    |              |              | 0.188271                    |
| Thermal correction to Enthalpy=                   |    |              |              | 0.189216                    |
| Thermal correction to Gibbs Free Energy=          |    |              |              | 0.127406                    |
| Sum of electronic and zero-point Energies=        |    |              |              | -4075.455392                |
| Sum of electronic and thermal Energies=           |    |              |              | -4075.440353                |
| Sum of electronic and thermal Enthalpies=         |    |              |              | -4075.439409                |
| Sum of electronic and thermal Free Energies=      |    |              |              | -4075.501218                |

**Table S18. Structure TS8 (4 → 5)**

|                                                                                    |    |              |              |                             |
|------------------------------------------------------------------------------------|----|--------------|--------------|-----------------------------|
| 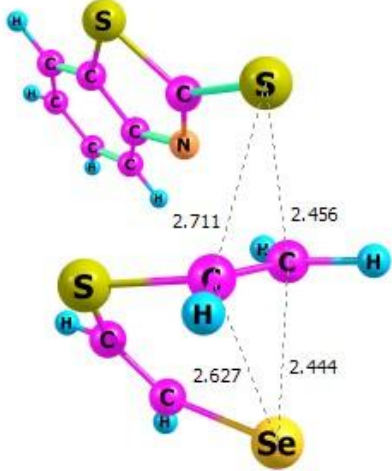 | 6  | -1.388303000 | -1.509306000 | -1.076609000                |
|                                                                                    | 6  | -2.434815000 | -1.860057000 | -0.315846000                |
|                                                                                    | 1  | -0.639453000 | -2.215925000 | -1.410984000                |
|                                                                                    | 1  | -2.576356000 | -2.900121000 | -0.043249000                |
|                                                                                    | 16 | -1.207985000 | 0.111120000  | -1.760067000                |
|                                                                                    | 6  | -1.974743000 | 1.086837000  | -0.560623000                |
|                                                                                    | 34 | -3.716716000 | -0.647345000 | 0.366594000                 |
|                                                                                    | 6  | -1.891375000 | 0.905664000  | 0.846762000                 |
|                                                                                    | 1  | -1.238692000 | 0.163067000  | 1.281245000                 |
|                                                                                    | 1  | -2.452999000 | 1.559079000  | 1.493357000                 |
|                                                                                    | 6  | 4.466849000  | -0.404448000 | -0.581795000                |
|                                                                                    | 6  | 3.265309000  | 0.173403000  | -0.172971000                |
|                                                                                    | 6  | 2.346722000  | -0.532601000 | 0.641357000                 |
|                                                                                    | 6  | 2.647352000  | -1.842766000 | 1.039380000                 |
|                                                                                    | 6  | 3.839917000  | -2.417633000 | 0.627048000                 |
|                                                                                    | 6  | 4.743073000  | -1.705136000 | -0.177204000                |
|                                                                                    | 6  | 1.193101000  | 1.360000000  | 0.489600000                 |
|                                                                                    | 7  | 1.206050000  | 0.161047000  | 0.992523000                 |
|                                                                                    | 1  | 5.167830000  | 0.142622000  | -1.200606000                |
|                                                                                    | 1  | 1.945495000  | -2.377026000 | 1.668187000                 |
|                                                                                    | 1  | 4.082196000  | -3.428800000 | 0.933231000                 |
|                                                                                    | 1  | 5.670416000  | -2.173275000 | -0.486486000                |
|                                                                                    | 16 | 2.619505000  | 1.763147000  | -0.516609000                |
|                                                                                    | 16 | -0.063989000 | 2.539781000  | 0.698734000                 |
|                                                                                    | 1  | -2.471443000 | 1.964268000  | -0.954095000                |
| Temperature 298.150 Kelvin. Pressure 1.00000 Atm.                                  |    |              |              |                             |
| Zero-point correction=                                                             |    |              |              | 0.169995 (Hartree/Particle) |
| Thermal correction to Energy=                                                      |    |              |              | 0.185440                    |
| Thermal correction to Enthalpy=                                                    |    |              |              | 0.186384                    |
| Thermal correction to Gibbs Free Energy=                                           |    |              |              | 0.123798                    |
| Sum of electronic and zero-point Energies=                                         |    |              |              | -4075.394499                |
| Sum of electronic and thermal Energies=                                            |    |              |              | -4075.379054                |
| Sum of electronic and thermal Enthalpies=                                          |    |              |              | -4075.378109                |
| Sum of electronic and thermal Free Energies=                                       |    |              |              | -4075.440696                |

**Table S19. Structure 5**

|                                                                                   |                                                           |              |              |              |
|-----------------------------------------------------------------------------------|-----------------------------------------------------------|--------------|--------------|--------------|
|  | 6                                                         | -4.360887000 | 0.706947000  | -0.643953000 |
|                                                                                   | 6                                                         | -4.499846000 | -0.433660000 | 0.029210000  |
|                                                                                   | 1                                                         | -5.177148000 | 1.385429000  | -0.859850000 |
|                                                                                   | 1                                                         | -5.434716000 | -0.799083000 | 0.431948000  |
|                                                                                   | 16                                                        | -2.777419000 | 1.175082000  | -1.283688000 |
|                                                                                   | 6                                                         | -1.777389000 | 0.052493000  | -0.220451000 |
|                                                                                   | 34                                                        | -2.933306000 | -1.502958000 | 0.272805000  |
|                                                                                   | 6                                                         | -1.247886000 | 0.722319000  | 1.043915000  |
|                                                                                   | 1                                                         | -2.052108000 | 1.208387000  | 1.596555000  |
|                                                                                   | 1                                                         | -0.760661000 | -0.012036000 | 1.684595000  |
|                                                                                   | 6                                                         | 5.009226000  | -0.002638000 | -0.427198000 |
|                                                                                   | 6                                                         | 3.686738000  | 0.316669000  | -0.128426000 |
|                                                                                   | 6                                                         | 2.714351000  | -0.683675000 | 0.088594000  |
|                                                                                   | 6                                                         | 3.082778000  | -2.030592000 | 0.004583000  |
|                                                                                   | 6                                                         | 4.400173000  | -2.351109000 | -0.292157000 |
|                                                                                   | 6                                                         | 5.355127000  | -1.347392000 | -0.506641000 |
|                                                                                   | 6                                                         | 1.403571000  | 1.070910000  | 0.387882000  |
|                                                                                   | 7                                                         | 1.438223000  | -0.218356000 | 0.373711000  |
|                                                                                   | 1                                                         | 5.749581000  | 0.770348000  | -0.593385000 |
|                                                                                   | 1                                                         | 2.335375000  | -2.796120000 | 0.173155000  |
|                                                                                   | 1                                                         | 4.695824000  | -3.391578000 | -0.359114000 |
|                                                                                   | 1                                                         | 6.378180000  | -1.620215000 | -0.737657000 |
|                                                                                   | 16                                                        | 2.941470000  | 1.899642000  | 0.042076000  |
|                                                                                   | 16                                                        | -0.020521000 | 2.056721000  | 0.715436000  |
|                                                                                   | 1                                                         | -0.961700000 | -0.340823000 | -0.820919000 |
|                                                                                   | Temperature 298.150 Kelvin. Pressure 1.00000 Atm.         |              |              |              |
|                                                                                   | Zero-point correction= 0.173009 (Hartree/Particle)        |              |              |              |
|                                                                                   | Thermal correction to Energy= 0.188033                    |              |              |              |
|                                                                                   | Thermal correction to Enthalpy= 0.188977                  |              |              |              |
|                                                                                   | Thermal correction to Gibbs Free Energy= 0.127253         |              |              |              |
|                                                                                   | Sum of electronic and zero-point Energies= -4075.460298   |              |              |              |
|                                                                                   | Sum of electronic and thermal Energies= -4075.445275      |              |              |              |
|                                                                                   | Sum of electronic and thermal Enthalpies= -4075.444331    |              |              |              |
|                                                                                   | Sum of electronic and thermal Free Energies= -4075.506055 |              |              |              |

**Table S20. Structure 3-3**

|                                                                                     |    |              |              |              |
|-------------------------------------------------------------------------------------|----|--------------|--------------|--------------|
| 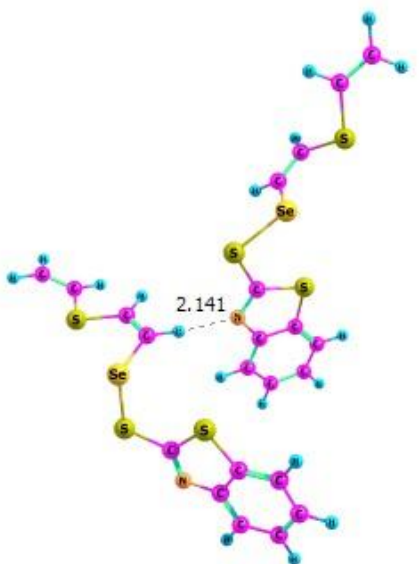 | 6  | -0.634693000 | -3.279040000 | 2.832531000  |
|                                                                                     | 6  | -0.892181000 | -2.209961000 | 1.972851000  |
|                                                                                     | 6  | 0.087555000  | -1.222851000 | 1.714542000  |
|                                                                                     | 6  | 1.344682000  | -1.308060000 | 2.327281000  |
|                                                                                     | 6  | 1.599028000  | -2.373412000 | 3.183112000  |
|                                                                                     | 6  | 0.619840000  | -3.348548000 | 3.434266000  |
|                                                                                     | 6  | -1.521018000 | -0.412003000 | 0.432217000  |
|                                                                                     | 7  | -0.310833000 | -0.220030000 | 0.836453000  |
|                                                                                     | 1  | -1.387630000 | -4.035670000 | 3.027610000  |
|                                                                                     | 1  | 2.094587000  | -0.551836000 | 2.122010000  |
|                                                                                     | 1  | 2.570101000  | -2.455039000 | 3.660906000  |
|                                                                                     | 1  | 0.842568000  | -4.171981000 | 4.105780000  |
|                                                                                     | 16 | -2.357401000 | -1.850154000 | 1.066285000  |
|                                                                                     | 16 | -2.286062000 | 0.736974000  | -0.695850000 |
|                                                                                     | 34 | -4.269345000 | -0.212943000 | -1.019553000 |
|                                                                                     | 6  | -5.232586000 | 0.645340000  | 0.400712000  |
|                                                                                     | 1  | -4.649801000 | 1.310716000  | 1.029410000  |
|                                                                                     | 6  | -6.534375000 | 0.422669000  | 0.599169000  |
|                                                                                     | 1  | -7.076324000 | 0.924118000  | 1.396445000  |
|                                                                                     | 16 | -7.408772000 | -0.807768000 | -0.338768000 |
|                                                                                     | 6  | -8.803024000 | 0.124681000  | -0.937470000 |
|                                                                                     | 1  | -8.583271000 | 1.145806000  | -1.236974000 |

|                                                   |               |              |                             |
|---------------------------------------------------|---------------|--------------|-----------------------------|
| 6                                                 | -10.012602000 | -0.415062000 | -1.090966000                |
| 1                                                 | -10.233363000 | -1.435439000 | -0.792991000                |
| 1                                                 | -10.817455000 | 0.158693000  | -1.539564000                |
| 6                                                 | 3.471914000   | -3.931649000 | -1.559402000                |
| 6                                                 | 3.905035000   | -2.659245000 | -1.183087000                |
| 6                                                 | 5.096782000   | -2.478464000 | -0.439797000                |
| 6                                                 | 5.861888000   | -3.593076000 | -0.071272000                |
| 6                                                 | 5.428899000   | -4.859702000 | -0.447165000                |
| 6                                                 | 4.245202000   | -5.028344000 | -1.183983000                |
| 6                                                 | 4.518302000   | -0.356514000 | -0.611744000                |
| 7                                                 | 5.406892000   | -1.159998000 | -0.134107000                |
| 1                                                 | 2.558014000   | -4.066158000 | -2.129008000                |
| 1                                                 | 6.774649000   | -3.446302000 | 0.496367000                 |
| 1                                                 | 6.013684000   | -5.731192000 | -0.168749000                |
| 1                                                 | 3.926003000   | -6.026849000 | -1.467007000                |
| 16                                                | 3.161439000   | -1.098294000 | -1.505247000                |
| 16                                                | 4.675649000   | 1.398312000  | -0.368067000                |
| 34                                                | 2.879813000   | 2.187986000  | -1.420310000                |
| 6                                                 | 1.607161000   | 2.232066000  | 0.007727000                 |
| 1                                                 | 1.005488000   | 1.342210000  | 0.194893000                 |
| 6                                                 | 1.423000000   | 3.350025000  | 0.725017000                 |
| 1                                                 | 0.660771000   | 3.369766000  | 1.502408000                 |
| 16                                                | 2.347772000   | 4.839245000  | 0.544204000                 |
| 6                                                 | 1.607248000   | 5.843763000  | 1.807796000                 |
| 1                                                 | 1.138790000   | 5.299866000  | 2.624741000                 |
| 6                                                 | 1.679203000   | 7.175136000  | 1.809186000                 |
| 1                                                 | 2.145549000   | 7.733269000  | 1.003145000                 |
| 1                                                 | 1.275743000   | 7.745213000  | 2.639441000                 |
| Temperature 298.150 Kelvin. Pressure 1.00000 Atm. |               |              |                             |
| Zero-point correction=                            |               |              | 0.342676 (Hartree/Particle) |
| Thermal correction to Energy=                     |               |              | 0.377229                    |
| Thermal correction to Enthalpy=                   |               |              | 0.378174                    |
| Thermal correction to Gibbs Free Energy=          |               |              | 0.262011                    |
| Sum of electronic and zero-point Energies=        |               |              | -8146.212625                |
| Sum of electronic and thermal Energies=           |               |              | -8146.178072                |
| Sum of electronic and thermal Enthalpies=         |               |              | -8146.177127                |
| Sum of electronic and thermal Free Energies=      |               |              | -8146.293290                |

Table S21. Structure TS9

|                                                                                   |    |              |              |                             |
|-----------------------------------------------------------------------------------|----|--------------|--------------|-----------------------------|
| 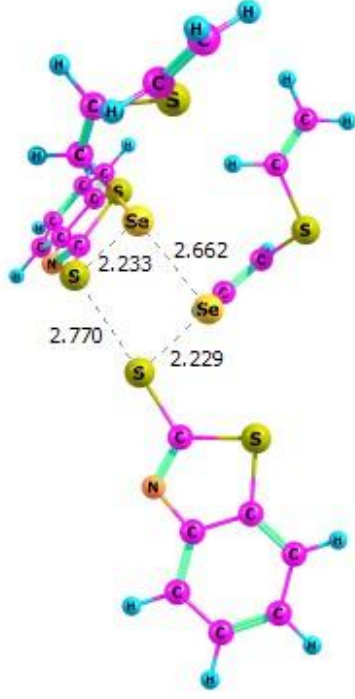 | 6  | 6.954833000  | -0.470251000 | 1.009720000                 |
|                                                                                   | 6  | 5.755714000  | -0.172740000 | 0.359779000                 |
|                                                                                   | 6  | 5.739571000  | 0.536862000  | -0.866017000                |
|                                                                                   | 6  | 6.946237000  | 0.956139000  | -1.442148000                |
|                                                                                   | 6  | 8.138999000  | 0.662998000  | -0.791414000                |
|                                                                                   | 6  | 8.143999000  | -0.043079000 | 0.423018000                 |
|                                                                                   | 6  | 3.559933000  | 0.253031000  | -0.654055000                |
|                                                                                   | 7  | 4.478670000  | 0.755627000  | -1.405219000                |
|                                                                                   | 1  | 6.963466000  | -1.016763000 | 1.947217000                 |
|                                                                                   | 1  | 6.925570000  | 1.499461000  | -2.380796000                |
|                                                                                   | 1  | 9.080552000  | 0.983325000  | -1.226822000                |
|                                                                                   | 1  | 9.087776000  | -0.260765000 | 0.913718000                 |
|                                                                                   | 16 | 4.109631000  | -0.572094000 | 0.831410000                 |
|                                                                                   | 16 | 1.831522000  | 0.488338000  | -1.094644000                |
|                                                                                   | 34 | 0.866151000  | -0.869660000 | 0.386083000                 |
|                                                                                   | 6  | 0.492499000  | 0.432982000  | 1.727804000                 |
|                                                                                   | 1  | 0.736362000  | 1.461817000  | 1.481922000                 |
|                                                                                   | 6  | -0.069732000 | 0.056562000  | 2.878166000                 |
|                                                                                   | 1  | -0.337418000 | 0.775485000  | 3.647058000                 |
|                                                                                   | 16 | -0.362697000 | -1.675568000 | 3.215987000                 |
|                                                                                   | 6  | -2.099591000 | -1.827654000 | 2.814748000                 |
|                                                                                   | 1  | -2.368785000 | -1.459541000 | 1.828640000                 |
|                                                                                   | 6  | -2.962008000 | -2.452450000 | 3.614981000                 |
|                                                                                   | 1  | -2.676395000 | -2.827440000 | 4.592983000                 |
|                                                                                   | 1  | -3.986255000 | -2.617437000 | 3.293767000                 |
|                                                                                   | 6  | -4.022964000 | 4.160810000  | 1.232620000                 |
|                                                                                   | 6  | -3.164170000 | 3.463753000  | 0.381031000                 |
|                                                                                   | 6  | -2.371520000 | 4.139469000  | -0.578971000                |
|                                                                                   | 6  | -2.444365000 | 5.535010000  | -0.682744000                |
|                                                                                   | 6  | -3.300857000 | 6.227320000  | 0.165418000                 |
|                                                                                   | 6  | -4.083095000 | 5.547642000  | 1.113792000                 |
|                                                                                   | 6  | -1.713550000 | 2.083907000  | -1.031728000                |
|                                                                                   | 7  | -1.565323000 | 3.321636000  | -1.359341000                |
|                                                                                   | 1  | -4.629182000 | 3.639648000  | 1.966469000                 |
|                                                                                   | 1  | -1.833994000 | 6.045187000  | -1.420132000                |
|                                                                                   | 1  | -3.367284000 | 7.308593000  | 0.094624000                 |
|                                                                                   | 1  | -4.745863000 | 6.109209000  | 1.765046000                 |
|                                                                                   | 16 | -2.865364000 | 1.733938000  | 0.285537000                 |
|                                                                                   | 16 | -0.803967000 | 0.815305000  | -1.882111000                |
|                                                                                   | 34 | -1.490694000 | -1.035863000 | -0.839977000                |
|                                                                                   | 6  | -3.155568000 | -1.248307000 | -1.881865000                |
|                                                                                   | 1  | -3.490763000 | -0.426502000 | -2.507673000                |
|                                                                                   | 6  | -3.850264000 | -2.386270000 | -1.813162000                |
|                                                                                   | 1  | -4.760528000 | -2.547099000 | -2.386175000                |
|                                                                                   | 16 | -3.394026000 | -3.674263000 | -0.666312000                |
|                                                                                   | 6  | -3.256939000 | -5.081467000 | -1.747130000                |
|                                                                                   | 1  | -2.858730000 | -4.865754000 | -2.735018000                |
|                                                                                   | 6  | -3.542553000 | -6.323880000 | -1.355180000                |
|                                                                                   | 1  | -3.939439000 | -6.543287000 | -0.368665000                |
|                                                                                   | 1  | -3.367321000 | -7.164036000 | -2.019686000                |
| Temperature 298.150 Kelvin. Pressure 1.00000 Atm.                                 |    |              |              |                             |
| Zero-point correction=                                                            |    |              |              | 0.343231 (Hartree/Particle) |
| Thermal correction to Energy=                                                     |    |              |              | 0.376078                    |
| Thermal correction to Enthalpy=                                                   |    |              |              | 0.377022                    |
| Thermal correction to Gibbs Free Energy=                                          |    |              |              | 0.272487                    |
| Sum of electronic and zero-point Energies=                                        |    |              |              | -8146.182441                |
| Sum of electronic and thermal Energies=                                           |    |              |              | -8146.149595                |
| Sum of electronic and thermal Enthalpies=                                         |    |              |              | -8146.148651                |
| Sum of electronic and thermal Free Energies=                                      |    |              |              | -8146.253186                |



**Table S22. Structure 6a–6b**

|                                                                                   |    |              |              |                             |
|-----------------------------------------------------------------------------------|----|--------------|--------------|-----------------------------|
| 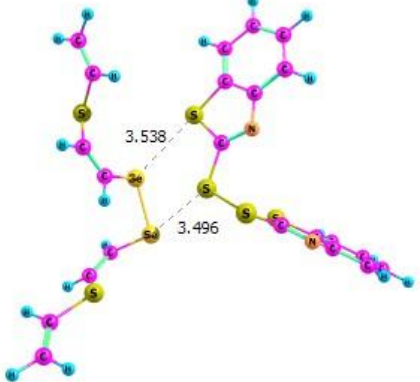 | 6  | 5.694568000  | -2.285358000 | -1.860873000                |
|                                                                                   | 6  | 4.856187000  | -1.974527000 | -0.788956000                |
|                                                                                   | 6  | 5.236435000  | -2.246671000 | 0.547321000                 |
|                                                                                   | 6  | 6.477583000  | -2.841899000 | 0.808762000                 |
|                                                                                   | 6  | 7.311283000  | -3.152741000 | -0.259221000                |
|                                                                                   | 6  | 6.924449000  | -2.877141000 | -1.581109000                |
|                                                                                   | 6  | 3.262776000  | -1.358436000 | 0.963140000                 |
|                                                                                   | 7  | 4.306355000  | -1.879615000 | 1.510141000                 |
|                                                                                   | 1  | 5.400317000  | -2.074281000 | -2.883780000                |
|                                                                                   | 1  | 6.761980000  | -3.047854000 | 1.835055000                 |
|                                                                                   | 1  | 8.275411000  | -3.614678000 | -0.070210000                |
|                                                                                   | 1  | 7.592180000  | -3.128059000 | -2.399604000                |
|                                                                                   | 16 | 3.260066000  | -1.236155000 | -0.812831000                |
|                                                                                   | 16 | 1.918363000  | -0.847069000 | 2.012163000                 |
|                                                                                   | 34 | -1.728390000 | -1.940881000 | -1.173519000                |
|                                                                                   | 6  | -3.420660000 | -2.725182000 | -1.610821000                |
|                                                                                   | 1  | -3.805679000 | -2.557200000 | -2.610215000                |
|                                                                                   | 6  | -4.078246000 | -3.501052000 | -0.739377000                |
|                                                                                   | 1  | -5.004023000 | -3.991530000 | -1.033037000                |
|                                                                                   | 16 | -3.542188000 | -3.832645000 | 0.912506000                 |
|                                                                                   | 6  | -4.943321000 | -4.731055000 | 1.535152000                 |
|                                                                                   | 1  | -5.901144000 | -4.475536000 | 1.087936000                 |
|                                                                                   | 6  | -4.852686000 | -5.600722000 | 2.541569000                 |
|                                                                                   | 1  | -3.903520000 | -5.862542000 | 2.998975000                 |
|                                                                                   | 1  | -5.744926000 | -6.068461000 | 2.944628000                 |
|                                                                                   | 6  | 1.195686000  | 5.382921000  | -0.442263000                |
|                                                                                   | 6  | 1.210649000  | 4.040770000  | -0.059340000                |
|                                                                                   | 6  | 2.284403000  | 3.497469000  | 0.683530000                 |
|                                                                                   | 6  | 3.360387000  | 4.316007000  | 1.051328000                 |
|                                                                                   | 6  | 3.344683000  | 5.653417000  | 0.672513000                 |
|                                                                                   | 6  | 2.273500000  | 6.182042000  | -0.066694000                |
|                                                                                   | 6  | 1.074708000  | 1.661334000  | 0.525153000                 |
|                                                                                   | 7  | 2.170188000  | 2.146940000  | 0.990781000                 |
|                                                                                   | 1  | 0.370786000  | 5.794936000  | -1.014341000                |
|                                                                                   | 1  | 4.180226000  | 3.891806000  | 1.620863000                 |
|                                                                                   | 1  | 4.171719000  | 6.299328000  | 0.950609000                 |
|                                                                                   | 1  | 2.283338000  | 7.229650000  | -0.351731000                |
|                                                                                   | 16 | 0.019089000  | 2.784489000  | -0.374967000                |
|                                                                                   | 16 | 0.531102000  | -0.038048000 | 0.695835000                 |
|                                                                                   | 34 | -2.358039000 | 0.322728000  | -1.271865000                |
|                                                                                   | 6  | -3.270515000 | 0.403577000  | 0.410015000                 |
|                                                                                   | 1  | -3.154305000 | -0.474187000 | 1.037323000                 |
|                                                                                   | 6  | -3.995760000 | 1.461922000  | 0.780522000                 |
|                                                                                   | 1  | -4.485848000 | 1.492908000  | 1.750015000                 |
|                                                                                   | 16 | -4.301222000 | 2.820834000  | -0.328891000                |
|                                                                                   | 6  | -3.689587000 | 4.195059000  | 0.622385000                 |
|                                                                                   | 1  | -2.789486000 | 3.992455000  | 1.196827000                 |
|                                                                                   | 6  | -4.237879000 | 5.410134000  | 0.570515000                 |
|                                                                                   | 1  | -5.138054000 | 5.615348000  | -0.000864000                |
|                                                                                   | 1  | -3.781411000 | 6.242161000  | 1.097605000                 |
| Temperature 298.150 Kelvin. Pressure 1.00000 Atm.                                 |    |              |              |                             |
| Zero-point correction=                                                            |    |              |              | 0.342345 (Hartree/Particle) |
| Thermal correction to Energy=                                                     |    |              |              | 0.377861                    |
| Thermal correction to Enthalpy=                                                   |    |              |              | 0.378805                    |
| Thermal correction to Gibbs Free Energy=                                          |    |              |              | 0.261014                    |
| Sum of electronic and zero-point Energies=                                        |    |              |              | -8146.209148                |
| Sum of electronic and thermal Energies=                                           |    |              |              | -8146.173632                |
| Sum of electronic and thermal Enthalpies=                                         |    |              |              | -8146.172688                |
| Sum of electronic and thermal Free Energies=                                      |    |              |              | -8146.290479                |

**Table S23. Structure A<sup>+</sup>**

|                                                                                   |                                                   |              |              |                             |
|-----------------------------------------------------------------------------------|---------------------------------------------------|--------------|--------------|-----------------------------|
| 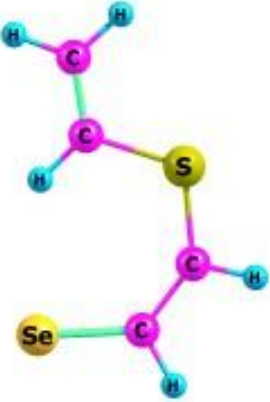 | 34                                                | 1.734659000  | 0.483697000  | 0.000077000                 |
|                                                                                   | 6                                                 | 1.048228000  | -1.166697000 | -0.000221000                |
|                                                                                   | 1                                                 | 1.752038000  | -1.995820000 | -0.000463000                |
|                                                                                   | 6                                                 | -0.311977000 | -1.596791000 | -0.000017000                |
|                                                                                   | 1                                                 | -0.455056000 | -2.677849000 | 0.000047000                 |
|                                                                                   | 16                                                | -1.818010000 | -0.893399000 | 0.000094000                 |
|                                                                                   | 6                                                 | -1.746345000 | 0.859506000  | -0.000418000                |
|                                                                                   | 1                                                 | -0.776323000 | 1.335106000  | -0.001125000                |
|                                                                                   | 6                                                 | -2.921868000 | 1.504645000  | 0.000117000                 |
|                                                                                   | 1                                                 | -3.880021000 | 0.994508000  | 0.000950000                 |
|                                                                                   | 1                                                 | -2.939117000 | 2.588757000  | -0.000296000                |
|                                                                                   | Temperature 298.150 Kelvin. Pressure 1.00000 Atm. |              |              |                             |
| Zero-point correction=                                                            |                                                   |              |              | 0.076341 (Hartree/Particle) |
| Thermal correction to Energy=                                                     |                                                   |              |              | 0.083656                    |
| Thermal correction to Enthalpy=                                                   |                                                   |              |              | 0.084600                    |
| Thermal correction to Gibbs Free Energy=                                          |                                                   |              |              | 0.042557                    |
| Sum of electronic and zero-point Energies=                                        |                                                   |              |              | -2954.809844                |
| Sum of electronic and thermal Energies=                                           |                                                   |              |              | -2954.802529                |
| Sum of electronic and thermal Enthalpies=                                         |                                                   |              |              | -2954.801585                |
| Sum of electronic and thermal Free Energies=                                      |                                                   |              |              | -2954.843628                |



**Table S24. Structure TS ( $A^+ \rightarrow B^+$ )**

|                                                                                   |                                                   |              |              |                             |
|-----------------------------------------------------------------------------------|---------------------------------------------------|--------------|--------------|-----------------------------|
| 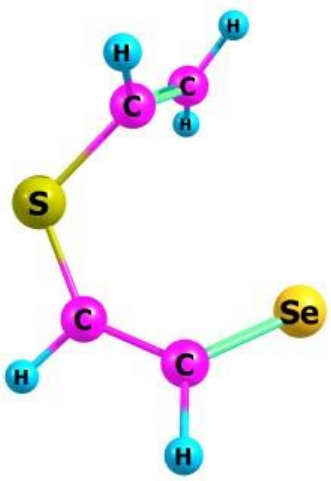 | 34                                                | 1.639926000  | 0.272384000  | -0.036738000                |
|                                                                                   | 6                                                 | 0.746910000  | -1.232830000 | 0.280300000                 |
|                                                                                   | 1                                                 | 1.285222000  | -2.078184000 | 0.709820000                 |
|                                                                                   | 6                                                 | -0.587491000 | -1.547304000 | -0.120550000                |
|                                                                                   | 1                                                 | -0.761808000 | -2.578821000 | -0.436674000                |
|                                                                                   | 16                                                | -2.024617000 | -0.710192000 | -0.144751000                |
|                                                                                   | 6                                                 | -1.796218000 | 0.936099000  | 0.532965000                 |
|                                                                                   | 1                                                 | -2.072459000 | 0.990805000  | 1.580993000                 |
|                                                                                   | 6                                                 | -1.526524000 | 1.988954000  | -0.228781000                |
|                                                                                   | 1                                                 | -1.309645000 | 1.919612000  | -1.287822000                |
|                                                                                   | 1                                                 | -1.524990000 | 2.979091000  | 0.215195000                 |
|                                                                                   | Temperature 298.150 Kelvin. Pressure 1.00000 Atm. |              |              |                             |
| Zero-point correction=                                                            |                                                   |              |              | 0.075482 (Hartree/Particle) |
| Thermal correction to Energy=                                                     |                                                   |              |              | 0.082148                    |
| Thermal correction to Enthalpy=                                                   |                                                   |              |              | 0.083092                    |
| Thermal correction to Gibbs Free Energy=                                          |                                                   |              |              | 0.042603                    |
| Sum of electronic and zero-point Energies=                                        |                                                   |              |              | -2954.800754                |
| Sum of electronic and thermal Energies=                                           |                                                   |              |              | -2954.794088                |
| Sum of electronic and thermal Enthalpies=                                         |                                                   |              |              | -2954.793144                |
| Sum of electronic and thermal Free Energies=                                      |                                                   |              |              | -2954.833634                |

**Table S25. Structure B<sup>+</sup>**

|                                                                                    |                                                   |              |              |                             |
|------------------------------------------------------------------------------------|---------------------------------------------------|--------------|--------------|-----------------------------|
|  | 34                                                | 1.348694000  | 0.022678000  | -0.164041000                |
|                                                                                    | 6                                                 | 0.173522000  | 1.439534000  | 0.195700000                 |
|                                                                                    | 1                                                 | 0.641599000  | 2.418624000  | 0.230981000                 |
|                                                                                    | 6                                                 | -1.165913000 | 1.333152000  | 0.345191000                 |
|                                                                                    | 1                                                 | -1.788520000 | 2.188658000  | 0.578385000                 |
|                                                                                    | 16                                                | -2.076748000 | -0.043697000 | -0.226888000                |
|                                                                                    | 6                                                 | -1.012426000 | -1.315457000 | -0.137140000                |
|                                                                                    | 1                                                 | -1.295274000 | -2.182990000 | -0.727252000                |
|                                                                                    | 6                                                 | 0.188114000  | -1.327230000 | 0.712728000                 |
|                                                                                    | 1                                                 | 0.006788000  | -0.994324000 | 1.735683000                 |
|                                                                                    | 1                                                 | 0.707991000  | -2.281869000 | 0.690916000                 |
|                                                                                    | Temperature 298.150 Kelvin. Pressure 1.00000 Atm. |              |              |                             |
| Zero-point correction=                                                             |                                                   |              |              | 0.078375 (Hartree/Particle) |
| Thermal correction to Energy=                                                      |                                                   |              |              | 0.084420                    |
| Thermal correction to Enthalpy=                                                    |                                                   |              |              | 0.085364                    |
| Thermal correction to Gibbs Free Energy=                                           |                                                   |              |              | 0.047337                    |
| Sum of electronic and zero-point Energies=                                         |                                                   |              |              | -2954.846935                |
| Sum of electronic and thermal Energies=                                            |                                                   |              |              | -2954.840890                |
| Sum of electronic and thermal Enthalpies=                                          |                                                   |              |              | -2954.839946                |
| Sum of electronic and thermal Free Energies=                                       |                                                   |              |              | -2954.877973                |
